# Supplementary material for: Riders on the storm: loggerhead sea turtles detect and respond to a major hurricane in the Northwest Atlantic Ocean
Source: Mov Ecol. 2020 Jul 27;8:32. doi: 10.1186/s40462-020-00218-6 (PMC7385951; doi:10.1186/s40462-020-00218-6)
Supplement: Supplementary file 3 — Additional file 3. Location source for tagged turtles and previously observed proportions of tagged turtles in the Mid-Atlantic Bight by month. [file 40462_2020_218_MOESM3_ESM.zip]

Archive with 4 entries (4 files):
- Croweetal2020__Ridersonthestorm_datadocumentation.pdf
- Croweetal2020_Ridersonthestorm_dive.csv
- Croweetal2020_Ridersonthestorm_location.csv
- Croweetal2020_Ridersonthestorm_tempdep.csv
