# Supplementary material for: Riders on the storm: loggerhead sea turtles detect and respond to a major hurricane in the Northwest Atlantic Ocean
Source: Mov Ecol. 2020 Jul 27;8:32. doi: 10.1186/s40462-020-00218-6 (PMC7385951; doi:10.1186/s40462-020-00218-6)
Supplement: Supplementary file 3 — Additional file 3. Location source for tagged turtles and previously observed proportions of tagged turtles in the Mid-Atlantic Bight by month. [file 40462_2020_218_MOESM3_ESM.zip › Croweetal2020_Ridersonthestorm_dive.csv]

ID	DS_EDT	divehr	MAX_DEP	TIME2DAY0	phase
b	2011-08-14 16:26:06	0.222777777777778	54	-13.517	Before
b	2011-08-14 16:43:00	0.0244444444444444	3	-13.514	Before
b	2011-08-15 19:48:28	0.0955555555555556	4	-12.382	Before
b	2011-08-16 13:10:32	0.233888888888889	56	-11.653	Before
b	2011-08-16 13:45:00	0.251666666666667	58	-11.628	Before
b	2011-08-16 17:22:50	0.00777777777777778	3	-11.487	Before
b	2011-08-16 17:12:44	0.162777777777778	8	-11.487	Before
b	2011-08-16 19:22:06	0.128888888888889	5	-11.399	Before
b	2011-08-16 19:31:50	0.125555555555556	6	-11.392	Before
b	2011-08-17 14:43:20	0.162777777777778	44	-10.591	Before
b	2011-08-18 06:05:30	0.160555555555556	42	-9.951	Before
b	2011-08-19 11:46:40	0.205	48	-8.712	Before
b	2011-08-19 12:24:40	0.196111111111111	50	-8.686	Before
b	2011-08-19 17:36:10	0.0233333333333333	5	-8.477	Before
b	2011-08-19 17:45:30	0.173888888888889	50	-8.464	Before
b	2011-08-19 18:15:32	0.0522222222222222	7	-8.448	Before
b	2011-08-19 18:28:10	0.03	8	-8.44	Before
b	2011-08-20 06:39:14	0.227222222222222	52	-7.925	Before
b	2011-08-20 06:55:40	0.0222222222222222	4	-7.922	Before
b	2011-08-20 19:05:42	0.0377777777777778	12	-7.414	Before
b	2011-08-20 19:11:30	0.0166666666666667	3	-7.411	Before
b	2011-08-21 07:54:34	0.0166666666666667	1	-6.881	Before
b	2011-08-21 07:59:30	0.169444444444444	48	-6.871	Before
b	2011-08-22 11:45:36	0.260555555555556	48	-5.71	Before
b	2011-08-22 12:20:20	0.196111111111111	48	-5.689	Before
b	2011-08-22 18:39:48	0.165	48	-5.427	Before
b	2011-08-22 19:05:20	0.153888888888889	6	-5.41	Before
b	2011-08-23 07:48:44	0.262777777777778	48	-4.875	Before
b	2011-08-23 08:21:20	0.293888888888889	48	-4.851	Before
b	2011-08-23 10:50:18	0.222777777777778	44	-4.75	Before
b	2011-08-23 11:15:10	0.247222222222222	46	-4.732	Before
b	2011-08-23 14:33:10	0.256111111111111	46	-4.594	Before
b	2011-08-23 15:19:50	0.180555555555556	44	-4.565	Before
b	2011-08-23 18:15:54	0.0311111111111111	5	-4.449	Before
b	2011-08-23 18:27:40	0.0133333333333333	3	-4.442	Before
b	2011-08-24 11:08:24	0.227222222222222	48	-3.738	Before
b	2011-08-24 11:36:20	0.327222222222222	48	-3.714	Before
b	2011-08-24 18:22:48	0.0622222222222222	10	-3.443	Before
b	2011-08-24 18:35:30	0.165	12	-3.43	Before
b	2011-08-26 09:21:30	0.113333333333333	30	-1.817	Approach
b	2011-08-26 09:54:00	0.298333333333333	52	-1.786	Approach
b	2011-08-27 08:29:30	0.160555555555556	52	-0.851	Approach
b	2011-08-27 08:56:30	0.198333333333333	52	-0.83	Approach
b	2011-08-27 12:44:14	0.00666666666666667	1	-0.68	Approach
b	2011-08-27 12:47:50	0.422777777777778	54	-0.66	Approach
b	2011-08-27 19:32:06	0.191666666666667	6	-0.389	During
b	2011-08-27 19:46:40	0.187222222222222	5	-0.379	During
b	2011-08-28 06:02:40	0.02	2	0.041	During
b	2011-08-28 10:42:12	0.0511111111111111	2	0.237	During
b	2011-08-28 10:49:20	0.561666666666667	46	0.263	During
b	2011-08-28 13:58:54	0.481666666666667	56	0.391	During
b	2011-08-28 14:32:00	0.530555555555556	58	0.416	During
b	2011-08-28 18:17:18	0.601666666666667	58	0.576	Departure
b	2011-08-28 18:59:40	0.712777777777778	30	0.61	Departure
b	2011-08-29 17:32:52	0.486111111111111	44	1.54	Departure
b	2011-08-29 18:23:00	0.735	42	1.585	Departure
b	2011-08-31 15:25:50	0.0288888888888889	5	3.433	After
b	2011-08-31 15:28:30	0.0277777777777778	4	3.435	After
b	2011-09-01 06:33:20	0.293888888888889	48	4.074	After
b	2011-09-01 06:54:30	0.407222222222222	48	4.094	After
b	2011-09-01 11:03:36	0.0166666666666667	1	4.25	After
b	2011-09-01 11:04:40	0.0144444444444444	1	4.251	After
b	2011-09-02 17:36:06	0.0411111111111111	9	5.524	After
b	2011-09-02 17:56:20	0.218333333333333	5	5.545	After
b	2011-09-03 06:25:08	0.165	6	6.063	After
b	2011-09-03 06:37:50	0.253888888888889	48	6.076	After
b	2011-09-04 06:47:18	0.351666666666667	48	7.086	After
b	2011-09-04 07:12:20	0.325	48	7.102	After
b	2011-09-04 19:29:10	0.202777777777778	4	7.609	After
b	2011-09-04 19:43:40	0.269444444444444	5	7.622	After
b	2011-09-05 07:09:12	0.242777777777778	48	8.097	After
b	2011-09-05 07:27:50	0.233888888888889	48	8.109	After
b	2011-09-05 08:51:30	0.260555555555556	46	8.169	After
b	2011-09-05 09:27:10	0.189444444444444	44	8.19	After
b	2011-09-05 23:46:40	0.247222222222222	5	8.79	After
b	2011-09-07 12:34:52	0.371666666666667	46	10.328	After
b	2011-09-07 12:59:50	0.490555555555556	44	10.351	After
b	2011-09-08 15:44:30	0.238333333333333	50	11.455	After
b	2011-09-08 15:59:00	0.0111111111111111	1	11.455	After
b	2011-09-09 06:36:02	0.127777777777778	12	12.069	After
b	2011-09-09 07:07:20	0.126666666666667	50	12.091	After
b	2011-09-09 08:21:24	0.316111111111111	50	12.15	After
b	2011-09-09 09:45:40	0.265	50	12.206	After
b	2011-09-09 11:40:34	0.160555555555556	48	12.282	After
b	2011-09-09 12:05:10	0.12	18	12.297	After
b	2011-09-09 23:51:08	0.463888888888889	6	12.802	After
b	2011-09-10 09:59:14	0.300555555555556	12	13.217	After
b	2011-09-10 10:19:20	0.428333333333333	38	13.237	After
c	2011-08-14 06:01:28	0.0744444444444444	2	-13.927	Before
c	2011-08-14 06:09:20	0.325	48	-13.911	Before
c	2011-08-14 15:03:58	0.205	54	-13.545	Before
c	2011-08-14 15:47:50	0.00777777777777778	1	-13.523	Before
c	2011-08-14 15:53:50	0.0666666666666667	2	-13.516	Before
c	2011-08-14 16:09:20	0.0455555555555556	1	-13.506	Before
c	2011-08-14 17:19:36	0.191666666666667	6	-13.452	Before
c	2011-08-14 18:14:40	0.233888888888889	54	-13.412	Before
c	2011-08-14 18:32:44	0.227222222222222	52	-13.399	Before
c	2011-08-15 09:55:12	0.01	1	-12.768	Before
c	2011-08-15 10:17:10	0.365	48	-12.738	Before
c	2011-08-15 10:47:28	0.316111111111111	48	-12.719	Before
c	2011-08-15 12:40:00	0.249444444444444	52	-12.643	Before
c	2011-08-15 15:47:10	0.220555555555556	52	-12.514	Before
c	2011-08-15 16:03:40	0.240555555555556	52	-12.502	Before
c	2011-08-16 06:39:34	0.393888888888889	46	-11.888	Before
c	2011-08-16 07:08:20	0.0433333333333333	2	-11.882	Before
c	2011-08-16 07:19:56	0.446111111111111	48	-11.857	Before
c	2011-08-16 08:10:20	0.365	48	-11.826	Before
c	2011-08-16 15:58:24	0.247222222222222	42	-11.506	Before
c	2011-08-16 16:17:10	0.200555555555556	42	-11.494	Before
c	2011-08-17 06:16:34	0.313888888888889	44	-10.907	Before
c	2011-08-17 06:39:00	0.307222222222222	44	-10.892	Before
c	2011-08-17 07:09:26	0.0966666666666667	2	-10.879	Before
c	2011-08-17 07:20:30	0.342777777777778	46	-10.861	Before
c	2011-08-17 09:25:36	0.316111111111111	46	-10.775	Before
c	2011-08-17 10:35:20	0.347222222222222	48	-10.726	Before
c	2011-08-17 23:58:00	0.114444444444444	2	-10.178	Before
c	2011-08-19 11:16:50	0.0544444444444444	2	-8.709	Before
c	2011-08-19 11:20:10	0.0355555555555556	1	-8.708	Before
c	2011-08-19 17:18:56	0.01	2	-8.46	Before
c	2011-08-19 18:43:30	0.238333333333333	44	-8.391	Before
c	2011-08-20 17:10:34	0.293888888888889	42	-7.454	Before
c	2011-08-20 17:31:40	0.245	42	-7.441	Before
c	2011-08-20 17:49:44	0.253888888888889	42	-7.428	Before
c	2011-08-20 18:57:20	0.311666666666667	42	-7.379	Before
c	2011-08-21 08:16:32	0.376111111111111	46	-6.821	Before
c	2011-08-21 09:34:40	0.307222222222222	48	-6.77	Before
c	2011-08-22 07:30:04	0.387222222222222	48	-5.853	Before
c	2011-08-22 08:20:20	0.490555555555556	50	-5.814	Before
c	2011-08-22 09:08:42	0.349444444444444	46	-5.786	Before
c	2011-08-22 09:51:10	0.0222222222222222	1	-5.77	Before
c	2011-08-22 15:25:50	0.0944444444444444	2	-5.535	Before
c	2011-08-22 15:35:30	0.0255555555555556	2	-5.531	Before
c	2011-08-22 15:49:44	0.0488888888888889	1	-5.52	Before
c	2011-08-22 15:57:00	0.116666666666667	2	-5.512	Before
c	2011-08-22 18:00:44	0.213888888888889	48	-5.422	Before
c	2011-08-22 18:24:40	0.01	4	-5.414	Before
c	2011-08-22 19:11:38	0.0611111111111111	2	-5.379	Before
c	2011-08-22 19:15:30	0.00888888888888889	1	-5.379	Before
c	2011-08-23 10:09:52	0.216111111111111	3	-4.749	Before
c	2011-08-23 10:26:50	0.387222222222222	44	-4.73	Before
c	2011-08-24 07:38:18	0.400555555555556	40	-3.846	Before
c	2011-08-24 08:40:50	0.526111111111111	46	-3.798	Before
c	2011-08-24 17:47:00	0.198333333333333	42	-3.432	Before
c	2011-08-24 19:25:00	0.0133333333333333	1	-3.372	Before
c	2011-08-24 19:26:14	0.00888888888888889	1	-3.371	Before
c	2011-08-24 19:51:20	0.0211111111111111	1	-3.353	Before
c	2011-08-24 19:54:16	0.0122222222222222	1	-3.352	Before
c	2011-08-25 06:21:52	0.307222222222222	46	-2.903	Before
c	2011-08-25 06:44:10	0.416111111111111	44	-2.883	Before
c	2011-08-25 07:21:36	0.450555555555556	48	-2.856	Before
c	2011-08-25 08:04:40	0.463888888888889	46	-2.826	Before
c	2011-08-25 15:34:28	0.01	1	-2.532	Before
c	2011-08-25 15:35:40	0.0144444444444444	1	-2.531	Before
c	2011-08-25 17:32:00	0.00777777777777778	1	-2.451	Before
c	2011-08-25 17:30:12	0.0222222222222222	1	-2.451	Before
c	2011-08-26 14:38:38	0.318333333333333	50	-1.558	Approach
c	2011-08-26 15:07:30	0.298333333333333	50	-1.539	Approach
c	2011-08-27 09:09:50	0.0144444444444444	1	-0.799	Approach
c	2011-08-27 09:11:10	0.01	1	-0.798	Approach
c	2011-08-27 09:12:12	0.0222222222222222	1	-0.797	Approach
c	2011-08-27 09:13:40	0.0111111111111111	1	-0.796	Approach
c	2011-08-27 09:24:04	0.503888888888889	50	-0.769	Approach
c	2011-08-27 10:18:20	0.441666666666667	48	-0.734	Approach
c	2011-08-27 10:54:56	0.0944444444444444	2	-0.723	Approach
c	2011-08-27 11:00:40	0.0166666666666667	1	-0.722	Approach
c	2011-08-27 15:08:48	0.229444444444444	4	-0.541	Approach
c	2011-08-27 15:27:10	0.253888888888889	6	-0.527	Approach
c	2011-08-27 18:03:38	0.128888888888889	3	-0.424	During
c	2011-08-27 18:13:50	0.0311111111111111	2	-0.421	During
c	2011-08-27 19:06:08	0.0188888888888889	3	-0.385	During
c	2011-08-27 19:16:30	0.0377777777777778	3	-0.377	During
c	2011-08-28 06:04:44	0.106666666666667	2	0.076	During
c	2011-08-28 06:13:40	0.0255555555555556	2	0.079	During
c	2011-08-28 06:18:42	0.0377777777777778	2	0.083	During
c	2011-08-28 06:22:10	0.211666666666667	32	0.093	During
c	2011-08-28 08:51:58	1.26611111111111	40	0.241	During
c	2011-08-28 10:13:40	0.615	7	0.27	During
c	2011-08-28 22:32:20	1.70166666666667	42	0.829	Departure
c	2011-08-29 07:43:56	1.50611111111111	42	1.203	Departure
c	2011-08-29 09:18:50	0.0633333333333333	2	1.209	Departure
c	2011-08-30 22:58:58	1.06166666666667	16	2.82	After
c	2011-08-31 06:00:30	0.00666666666666667	1	3.069	After
c	2011-08-31 06:08:50	0.0555555555555556	1	3.077	After
c	2011-08-31 06:49:28	0.0133333333333333	1	3.103	After
c	2011-08-31 06:54:20	1.10611111111111	48	3.152	After
c	2011-08-31 08:09:00	0.646111111111111	48	3.185	After
c	2011-08-31 09:23:20	0.757222222222222	50	3.241	After
c	2011-08-31 11:20:00	0.810555555555556	46	3.325	After
c	2011-09-01 07:13:14	1.07944444444444	38	4.164	After
c	2011-09-01 08:33:30	0.00666666666666667	1	4.175	After
c	2011-09-01 14:19:18	0.0388888888888889	4	4.417	After
c	2011-09-01 14:25:30	0.761666666666667	36	4.451	After
c	2011-09-02 06:27:20	0.0922222222222222	38	5.091	After
c	2011-09-02 06:35:40	0.0111111111111111	1	5.094	After
c	2011-09-02 07:54:26	0.708333333333333	42	5.178	After
c	2011-09-02 09:35:10	0.00777777777777778	1	5.218	After
c	2011-09-02 12:31:00	0.846111111111111	42	5.375	After
c	2011-09-02 16:13:30	0.770555555555556	44	5.527	After
c	2011-09-02 19:39:10	0.291666666666667	3	5.65	After
c	2011-09-02 23:29:18	0.681666666666667	7	5.826	After
c	2011-09-05 06:07:40	0.0122222222222222	1	8.074	After
c	2011-09-05 06:09:06	0.00888888888888889	1	8.075	After
c	2011-09-05 06:09:50	0.107777777777778	2	8.08	After
c	2011-09-05 06:20:26	0.583888888888889	56	8.107	After
c	2011-09-05 07:02:00	0.592777777777778	56	8.136	After
c	2011-09-05 12:13:16	0.579444444444444	54	8.352	After
c	2011-09-05 12:57:40	0.521666666666667	54	8.38	After
c	2011-09-05 19:06:40	0.00888888888888889	1	8.615	After
c	2011-09-05 19:13:00	0.0222222222222222	1	8.62	After
c	2011-09-05 23:59:40	0.347222222222222	4	8.833	After
c	2011-09-06 06:13:26	0.213888888888889	3	9.087	After
c	2011-09-06 06:31:00	0.699444444444444	54	9.119	After
c	2011-09-07 06:12:02	0.06	2	10.079	After
c	2011-09-07 06:20:50	0.121111111111111	52	10.088	After
c	2011-09-07 07:45:54	0.641666666666667	54	10.169	After
c	2011-09-07 08:56:30	0.628333333333333	56	10.217	After
c	2011-09-07 12:30:24	0.211666666666667	54	10.348	After
c	2011-09-07 13:50:00	0.03	1	10.396	After
c	2011-09-07 13:51:52	0.0855555555555556	1	10.4	After
c	2011-09-07 14:00:00	0.185	2	10.41	After
c	2011-09-07 14:21:04	0.00666666666666667	2	10.417	After
c	2011-09-07 14:25:40	0.116666666666667	50	10.425	After
c	2011-09-08 23:28:10	0.761666666666667	5	11.828	After
c	2011-09-09 06:53:16	0.00888888888888889	1	12.106	After
c	2011-09-09 06:54:20	0.00666666666666667	1	12.107	After
c	2011-09-09 09:48:02	0.00666666666666667	1	12.227	After
c	2011-09-09 09:49:10	0.00666666666666667	1	12.228	After
c	2011-09-09 09:49:46	0.00777777777777778	1	12.228	After
c	2011-09-09 10:06:00	0.01	2	12.24	After
c	2011-09-09 13:43:36	0.0188888888888889	1	12.391	After
c	2011-09-09 13:45:00	0.03	1	12.393	After
c	2011-09-10 06:31:16	0.530555555555556	34	13.112	After
c	2011-09-10 07:06:30	0.868333333333333	34	13.151	After
c	2011-09-10 17:20:02	0.0277777777777778	8	13.542	After
c	2011-09-10 17:22:50	0.0388888888888889	2	13.544	After
c	2011-09-10 17:31:12	0.0122222222222222	1	13.549	After
c	2011-09-10 17:32:20	0.0255555555555556	1	13.55	After
c	2011-09-10 17:46:24	0.0777777777777778	2	13.562	After
c	2011-09-10 17:59:00	0.0222222222222222	1	13.569	After
c	2011-09-10 18:00:44	0.0333333333333333	2	13.57	After
c	2011-09-10 18:05:00	0.165	2	13.579	After
c	2011-09-10 18:51:44	0.171666666666667	4	13.612	After
c	2011-09-10 19:05:10	0.0144444444444444	3	13.614	After
c	2011-09-10 19:06:18	0.342777777777778	4	13.629	After
d	2011-08-14 14:02:12	0.307222222222222	32	-13.539	Before
d	2011-08-14 14:30:00	0.289444444444444	34	-13.521	Before
d	2011-08-14 17:48:12	0.273888888888889	42	-13.384	Before
d	2011-08-14 18:09:10	0.238333333333333	42	-13.371	Before
d	2011-08-14 18:25:42	0.0488888888888889	2	-13.367	Before
d	2011-08-14 18:31:30	0.316111111111111	11	-13.352	Before
d	2011-08-15 12:01:00	0.353888888888889	32	-12.622	Before
d	2011-08-15 12:39:20	0.176111111111111	16	-12.602	Before
d	2011-08-15 17:33:56	0.180555555555556	30	-12.398	Before
d	2011-08-15 17:56:40	0.205	32	-12.381	Before
d	2011-08-16 07:02:42	0.302777777777778	42	-11.831	Before
d	2011-08-16 07:25:00	0.325	42	-11.814	Before
d	2011-08-16 11:29:18	0.0455555555555556	2	-11.656	Before
d	2011-08-16 11:51:40	0.269444444444444	38	-11.632	Before
d	2011-08-16 14:43:48	0.300555555555556	34	-11.511	Before
d	2011-08-16 15:12:40	0.285	12	-11.491	Before
d	2011-08-16 16:25:42	0.220555555555556	34	-11.443	Before
d	2011-08-16 16:55:30	0.220555555555556	32	-11.423	Before
d	2011-08-16 18:23:08	0.276111111111111	36	-11.359	Before
d	2011-08-16 18:44:30	0.0455555555555556	2	-11.354	Before
d	2011-08-17 14:35:46	0.227222222222222	36	-10.519	Before
d	2011-08-17 14:53:40	0.205	34	-10.508	Before
d	2011-08-18 15:07:12	0.156111111111111	32	-9.501	Before
d	2011-08-18 15:51:20	0.182777777777778	32	-9.469	Before
d	2011-08-18 19:29:34	0.0377777777777778	2	-9.323	Before
d	2011-08-18 19:42:00	0.289444444444444	11	-9.304	Before
d	2011-08-18 23:59:56	0.14	2	-9.131	Before
d	2011-08-19 06:13:02	0.256111111111111	10	-8.867	Before
d	2011-08-19 06:30:00	0.247222222222222	7	-8.856	Before
d	2011-08-19 06:59:10	0.202777777777778	9	-8.838	Before
d	2011-08-19 07:18:20	0.193888888888889	12	-8.825	Before
d	2011-08-19 07:43:06	0.162777777777778	32	-8.809	Before
d	2011-08-19 08:13:50	0.151666666666667	34	-8.788	Before
d	2011-08-19 16:10:56	0.0255555555555556	3	-8.462	Before
d	2011-08-19 17:00:50	0.0633333333333333	15	-8.426	Before
d	2011-08-19 17:07:34	0.182777777777778	36	-8.416	Before
d	2011-08-19 17:34:10	0.189444444444444	34	-8.397	Before
d	2011-08-20 17:33:06	0.0188888888888889	2	-7.405	Before
d	2011-08-20 18:01:00	0.0444444444444444	2	-7.385	Before
d	2011-08-20 18:05:36	0.134444444444444	34	-7.378	Before
d	2011-08-20 18:16:00	0.202777777777778	34	-7.368	Before
d	2011-08-21 13:49:06	0.311666666666667	36	-6.548	Before
d	2011-08-21 14:38:50	0.216111111111111	34	-6.518	Before
d	2011-08-21 17:43:24	0.0277777777777778	2	-6.397	Before
d	2011-08-21 17:49:00	0.289444444444444	36	-6.383	Before
d	2011-08-21 19:22:42	0.282777777777778	42	-6.318	Before
d	2011-08-21 19:41:40	0.107777777777778	3	-6.312	Before
d	2011-08-22 07:27:38	0.340555555555556	38	-5.812	Before
d	2011-08-22 08:05:50	0.287222222222222	36	-5.788	Before
d	2011-08-22 11:00:46	0.318333333333333	40	-5.665	Before
d	2011-08-22 11:36:10	0.342777777777778	40	-5.639	Before
d	2011-08-22 19:26:02	0.135555555555556	3	-5.322	Before
d	2011-08-22 19:36:30	0.296111111111111	13	-5.308	Before
d	2011-08-23 18:02:10	0.260555555555556	36	-4.375	Before
d	2011-08-23 18:22:20	0.260555555555556	36	-4.361	Before
d	2011-08-23 18:42:40	0.00666666666666667	1	-4.357	Before
d	2011-08-23 18:43:20	0.0177777777777778	1	-4.356	Before
d	2011-08-24 06:28:10	0.276111111111111	32	-3.856	Before
d	2011-08-24 06:47:40	0.300555555555556	32	-3.841	Before
d	2011-08-25 12:24:22	0.213888888888889	15	-2.611	Before
d	2011-08-25 12:42:20	0.0111111111111111	2	-2.607	Before
d	2011-08-26 16:58:54	0.158333333333333	18	-1.423	Approach
d	2011-08-26 17:55:10	0.0788888888888889	36	-1.387	Approach
d	2011-08-26 19:16:06	0.260555555555556	16	-1.323	Approach
d	2011-08-27 11:21:22	0.463888888888889	14	-0.645	Approach
d	2011-08-27 11:59:30	0.396111111111111	38	-0.621	Approach
d	2011-08-27 16:24:16	0.00777777777777778	2	-0.453	During
d	2011-08-27 16:25:40	0.01	1	-0.452	During
d	2011-08-27 16:28:20	0.00777777777777778	1	-0.45	During
d	2011-08-27 16:40:10	0.425	9	-0.425	During
d	2011-08-27 18:05:00	0.127777777777778	8	-0.378	During
d	2011-08-27 18:15:00	0.282777777777778	36	-0.365	During
d	2011-08-27 23:52:10	0.349444444444444	6	-0.128	During
d	2011-08-28 06:35:32	0.342777777777778	32	0.152	During
d	2011-08-28 06:59:10	0.810555555555556	34	0.188	During
d	2011-08-28 09:43:50	0.663888888888889	30	0.296	During
d	2011-08-28 10:28:00	0.757222222222222	34	0.331	During
d	2011-08-28 11:16:46	1.23944444444444	32	0.385	During
d	2011-08-28 12:38:00	0.743888888888889	36	0.42	During
d	2011-08-28 13:26:44	1.23055555555556	34	0.474	During
d	2011-08-28 14:46:10	1.65722222222222	32	0.547	Departure
d	2011-08-29 08:53:42	0.748333333333333	20	1.265	Departure
d	2011-08-29 09:43:00	0.788333333333333	22	1.301	Departure
d	2011-08-29 10:33:16	0.0533333333333333	3	1.305	Departure
d	2011-08-29 10:42:00	0.739444444444444	20	1.34	Departure
d	2011-08-29 15:38:14	0.779444444444444	20	1.547	Departure
d	2011-08-29 16:29:40	0.717222222222222	20	1.58	Departure
d	2011-08-29 19:36:08	0.0877777777777778	3	1.683	Departure
d	2011-08-30 06:19:10	0.841666666666667	19	2.161	After
d	2011-08-30 08:19:40	0.810555555555556	20	2.244	After
d	2011-08-30 09:13:30	0.797222222222222	22	2.281	After
d	2011-08-30 16:12:56	0.0155555555555556	4	2.539	After
d	2011-08-30 16:15:40	0.0111111111111111	3	2.541	After
d	2011-08-30 16:16:32	0.0177777777777778	3	2.542	After
d	2011-08-30 16:18:20	0.0166666666666667	3	2.543	After
d	2011-08-30 16:50:58	0.00666666666666667	2	2.565	After
d	2011-08-30 16:51:50	0.0488888888888889	3	2.568	After
d	2011-08-31 09:28:28	0.0422222222222222	6	3.259	After
d	2011-08-31 09:32:40	0.122222222222222	16	3.266	After
d	2011-08-31 09:42:02	0.318333333333333	36	3.28	After
d	2011-08-31 12:18:10	0.00777777777777778	3	3.376	After
d	2011-08-31 12:44:02	0.02	3	3.394	After
d	2011-08-31 12:49:50	0.0633333333333333	17	3.4	After
d	2011-08-31 15:14:40	0.00888888888888889	2	3.498	After
d	2011-08-31 15:13:08	0.0177777777777778	2	3.498	After
d	2011-08-31 15:15:26	0.00666666666666667	2	3.499	After
d	2011-08-31 15:20:10	0.0177777777777778	2	3.503	After
d	2011-08-31 17:27:04	0.249444444444444	9	3.6	After
d	2011-08-31 19:27:20	0.0233333333333333	22	3.675	After
d	2011-09-01 07:38:14	0.623888888888889	34	4.207	After
d	2011-09-01 08:27:50	0.432777777777778	32	4.234	After
d	2011-09-01 15:00:10	0.521666666666667	36	4.51	After
d	2011-09-01 15:44:10	0.285	30	4.53	After
d	2011-09-01 16:33:44	0.262777777777778	30	4.564	After
d	2011-09-01 16:59:40	0.01	4	4.571	After
d	2011-09-02 10:46:00	0.712777777777778	36	5.341	After
d	2011-09-02 11:52:40	0.655	36	5.385	After
d	2011-09-03 17:47:50	0.173888888888889	28	6.612	After
d	2011-09-03 19:07:50	0.176111111111111	3	6.667	After
d	2011-09-04 06:27:06	0.490555555555556	36	7.152	After
d	2011-09-04 06:59:40	0.151666666666667	10	7.161	After
d	2011-09-04 18:36:52	0.128888888888889	36	7.644	After
d	2011-09-04 18:46:20	0.0166666666666667	2	7.646	After
d	2011-09-04 19:22:16	0.0177777777777778	2	7.671	After
d	2011-09-04 19:27:00	0.407222222222222	9	7.69	After
d	2011-09-04 23:49:50	0.216111111111111	2	7.865	After
d	2011-09-06 06:18:50	0.00666666666666667	1	9.126	After
d	2011-09-06 06:17:42	0.00666666666666667	1	9.126	After
d	2011-09-07 10:06:50	0.00666666666666667	1	10.285	After
d	2011-09-07 10:08:30	0.00888888888888889	1	10.286	After
d	2011-09-07 10:07:50	0.0111111111111111	1	10.286	After
d	2011-09-07 10:22:40	0.03	3	10.297	After
d	2011-09-08 06:24:34	0.302777777777778	16	11.143	After
d	2011-09-08 06:45:00	0.338333333333333	32	11.158	After
d	2011-09-08 13:25:20	0.169444444444444	20	11.429	After
d	2011-09-08 13:59:00	0.256111111111111	19	11.456	After
d	2011-09-08 16:15:08	0.216111111111111	20	11.549	After
d	2011-09-08 16:42:40	0.305	22	11.572	After
d	2011-09-09 08:07:04	0.0288888888888889	5	12.202	After
d	2011-09-09 08:09:20	0.00666666666666667	4	12.203	After
d	2011-09-09 08:09:48	0.0144444444444444	5	12.204	After
d	2011-09-09 08:13:40	0.0355555555555556	6	12.207	After
d	2011-09-09 09:16:34	0.477222222222222	32	12.269	After
d	2011-09-09 09:47:40	0.393888888888889	18	12.287	After
d	2011-09-09 12:48:02	0.0433333333333333	7	12.398	After
d	2011-09-09 13:00:40	0.468333333333333	18	12.425	After
d	2011-09-09 16:02:00	0.00666666666666667	3	12.531	After
d	2011-09-09 16:10:40	0.351666666666667	19	12.552	After
d	2011-09-09 17:15:22	0.365	18	12.597	After
d	2011-09-09 17:41:00	0.411666666666667	19	12.617	After
d	2011-09-09 18:50:56	0.0388888888888889	4	12.65	After
d	2011-09-09 18:58:40	0.305	14	12.666	After
d	2011-09-09 19:20:10	0.437222222222222	14	12.687	After
d	2011-09-09 19:49:40	0.00777777777777778	1	12.689	After
d	2011-09-10 08:19:12	0.365	38	13.225	After
d	2011-09-10 08:43:10	0.441666666666667	16	13.245	After
d	2011-09-10 10:08:24	0.333888888888889	12	13.299	After
d	2011-09-10 10:42:20	0.00666666666666667	2	13.309	After
d	2011-09-10 14:22:02	0.0111111111111111	2	13.462	After
d	2011-09-10 14:24:30	0.0122222222222222	2	13.464	After
d	2011-09-10 14:34:58	0.128888888888889	11	13.476	After
d	2011-09-10 14:54:20	0.0133333333333333	2	13.485	After
d	2011-09-10 15:38:54	0.0111111111111111	2	13.515	After
d	2011-09-10 15:40:10	0.00666666666666667	2	13.516	After
d	2011-09-10 17:12:42	0.0422222222222222	4	13.582	After
d	2011-09-10 17:37:40	0.0177777777777778	4	13.598	After
e	2011-08-14 16:44:28	0.0144444444444444	1	-13.422	Before
e	2011-08-14 16:50:40	0.229444444444444	54	-13.408	Before
e	2011-08-15 06:29:10	0.256111111111111	56	-12.839	Before
e	2011-08-15 06:47:00	0.296111111111111	56	-12.825	Before
e	2011-08-15 15:56:52	0.0611111111111111	12	-12.453	Before
e	2011-08-15 16:03:20	0.0155555555555556	2	-12.45	Before
e	2011-08-16 09:52:24	0.289444444444444	56	-11.696	Before
e	2011-08-16 10:25:40	0.238333333333333	56	-11.675	Before
e	2011-08-16 13:53:22	0.0277777777777778	1	-11.54	Before
e	2011-08-16 14:31:40	0.189444444444444	50	-11.506	Before
e	2011-08-16 16:16:46	0.0111111111111111	1	-11.441	Before
e	2011-08-16 16:19:50	0.0533333333333333	3	-11.437	Before
e	2011-08-17 10:38:20	0.0366666666666667	2	-10.675	Before
e	2011-08-17 10:42:00	0.0766666666666667	3	-10.671	Before
e	2011-08-18 13:05:54	0.329444444444444	56	-9.56	Before
e	2011-08-18 13:52:10	0.329444444444444	52	-9.528	Before
e	2011-08-19 08:21:42	0.0311111111111111	12	-8.77	Before
e	2011-08-19 08:44:40	0.282777777777778	54	-8.744	Before
e	2011-08-20 16:04:28	0.0533333333333333	6	-7.448	Before
e	2011-08-20 16:09:40	0.0444444444444444	3	-7.444	Before
e	2011-08-20 17:23:18	0.0433333333333333	2	-7.393	Before
e	2011-08-20 17:27:50	0.0466666666666667	1	-7.39	Before
e	2011-08-20 18:08:42	0.0133333333333333	2	-7.363	Before
e	2011-08-20 18:30:20	0.0411111111111111	2	-7.347	Before
e	2011-08-21 10:59:00	0.0288888888888889	1	-6.661	Before
e	2011-08-21 11:01:00	0.00777777777777778	1	-6.66	Before
e	2011-08-21 18:47:58	0.118888888888889	3	-6.331	Before
e	2011-08-21 19:08:20	0.0633333333333333	2	-6.32	Before
e	2011-08-21 19:20:58	0.145	7	-6.307	Before
e	2011-08-21 19:32:00	0.187222222222222	10	-6.298	Before
e	2011-08-22 09:25:22	0.01	1	-5.727	Before
e	2011-08-22 09:36:40	0.01	2	-5.719	Before
e	2011-08-22 16:18:34	0.267222222222222	50	-5.429	Before
e	2011-08-22 16:36:00	0.0222222222222222	2	-5.427	Before
e	2011-08-23 11:15:14	0.269444444444444	48	-4.64	Before
e	2011-08-23 12:10:10	0.287222222222222	50	-4.601	Before
e	2011-08-23 17:32:14	0.0588888888888889	3	-4.387	Before
e	2011-08-23 17:38:50	0.0277777777777778	1	-4.383	Before
e	2011-08-23 18:46:10	0.0166666666666667	2	-4.337	Before
e	2011-08-23 18:47:50	0.0388888888888889	3	-4.335	Before
e	2011-08-24 06:49:06	0.00666666666666667	2	-3.835	Before
e	2011-08-24 06:49:50	0.0111111111111111	2	-3.835	Before
e	2011-08-24 07:37:46	0.0177777777777778	2	-3.801	Before
e	2011-08-24 07:52:20	0.296111111111111	46	-3.779	Before
e	2011-08-24 16:58:30	0.103333333333333	7	-3.408	Before
e	2011-08-24 17:10:10	0.296111111111111	56	-3.392	Before
e	2011-08-25 15:36:04	0.280555555555556	50	-2.458	Before
e	2011-08-25 16:15:20	0.287222222222222	50	-2.43	Before
e	2011-08-26 06:46:00	0.318333333333333	50	-1.825	Approach
e	2011-08-26 07:08:50	0.351666666666667	50	-1.807	Approach
e	2011-08-26 10:33:20	0.00777777777777778	1	-1.68	Approach
e	2011-08-26 10:34:20	0.00666666666666667	1	-1.679	Approach
e	2011-08-26 10:39:00	0.0377777777777778	3	-1.674	Approach
e	2011-08-26 10:42:00	0.0122222222222222	2	-1.673	Approach
e	2011-08-26 18:14:04	0.216111111111111	50	-1.351	Approach
e	2011-08-26 18:29:10	0.0322222222222222	2	-1.348	Approach
e	2011-08-26 19:28:24	0.149444444444444	50	-1.302	Approach
e	2011-08-27 06:00:40	0.04	1	-0.868	Approach
e	2011-08-27 06:08:40	0.291666666666667	50	-0.852	Approach
e	2011-08-27 06:28:36	0.229444444444444	50	-0.84	Approach
e	2011-08-27 06:44:50	0.327222222222222	50	-0.825	Approach
e	2011-08-27 09:04:22	0.0122222222222222	2	-0.741	Approach
e	2011-08-27 09:11:30	0.211666666666667	48	-0.728	Approach
e	2011-08-27 09:27:46	0.227222222222222	48	-0.716	Approach
e	2011-08-27 09:49:20	0.0133333333333333	1	-0.71	Approach
e	2011-08-27 09:56:54	0.358333333333333	50	-0.69	Approach
e	2011-08-27 10:35:30	0.389444444444444	50	-0.662	Approach
e	2011-08-27 11:11:32	0.0144444444444444	2	-0.653	Approach
e	2011-08-27 11:17:00	0.391666666666667	50	-0.633	Approach
e	2011-08-27 11:42:56	0.0811111111111111	3	-0.628	Approach
e	2011-08-27 11:49:20	0.0166666666666667	2	-0.626	Approach
e	2011-08-27 12:20:38	0.0111111111111111	2	-0.605	Approach
e	2011-08-27 12:26:30	0.307222222222222	50	-0.589	Approach
e	2011-08-27 16:21:20	0.0855555555555556	4	-0.435	During
e	2011-08-27 16:30:00	0.173888888888889	50	-0.425	During
e	2011-08-27 16:56:06	0.0222222222222222	3	-0.413	During
e	2011-08-27 17:01:50	0.09	50	-0.406	During
e	2011-08-27 19:01:10	0.0177777777777778	2	-0.326	During
e	2011-08-27 19:07:10	0.189444444444444	11	-0.315	During
e	2011-08-29 08:44:30	0.0333333333333333	7	1.246	Departure
e	2011-08-29 08:47:10	0.0488888888888889	7	1.248	Departure
e	2011-08-29 19:07:24	0.269444444444444	52	1.688	Departure
e	2011-08-29 19:32:40	0.00666666666666667	1	1.695	Departure
e	2011-08-30 08:25:48	0.107777777777778	6	2.236	After
e	2011-08-30 08:37:00	0.400555555555556	46	2.256	After
e	2011-08-30 17:24:50	0.149444444444444	3	2.612	After
e	2011-08-30 17:38:20	0.123333333333333	8	2.62	After
e	2011-08-31 07:25:56	0.282777777777778	54	3.202	After
e	2011-08-31 07:56:40	0.0122222222222222	1	3.212	After
e	2011-08-31 10:43:34	0.0255555555555556	2	3.328	After
e	2011-08-31 10:45:50	0.0177777777777778	2	3.33	After
e	2011-08-31 17:31:06	0.01	1	3.611	After
e	2011-08-31 17:32:10	0.0344444444444444	4	3.612	After
e	2011-08-31 17:44:00	0.0177777777777778	4	3.62	After
e	2011-08-31 17:45:20	0.0322222222222222	4	3.621	After
e	2011-09-01 18:38:52	0.00666666666666667	1	4.658	After
e	2011-09-01 18:39:20	0.0422222222222222	2	4.659	After
e	2011-09-03 06:42:20	0.0344444444444444	11	6.161	After
e	2011-09-03 06:45:42	0.0222222222222222	5	6.163	After
e	2011-09-03 06:47:30	0.0233333333333333	4	6.164	After
e	2011-09-03 11:46:06	0.231666666666667	52	6.38	After
e	2011-09-03 13:27:10	0.00777777777777778	3	6.441	After
e	2011-09-03 14:57:14	0.0144444444444444	1	6.504	After
e	2011-09-03 15:13:20	0.0122222222222222	1	6.515	After
e	2011-09-04 09:28:12	0.00888888888888889	1	7.275	After
e	2011-09-04 09:47:10	0.0122222222222222	2	7.289	After
e	2011-09-05 12:08:56	0.333888888888889	56	8.4	After
e	2011-09-05 13:04:00	0.378333333333333	56	8.44	After
e	2011-09-05 14:57:24	0.371666666666667	56	8.519	After
e	2011-09-05 15:19:50	0.0111111111111111	1	8.52	After
e	2011-09-05 17:28:50	0.331666666666667	56	8.622	After
e	2011-09-05 17:53:00	0.01	1	8.626	After
e	2011-09-06 07:42:54	0.499444444444444	52	9.223	After
e	2011-09-06 08:20:00	0.512777777777778	52	9.249	After
e	2011-09-06 16:51:22	0.376111111111111	54	9.598	After
e	2011-09-06 17:19:40	0.373888888888889	54	9.618	After
e	2011-09-08 06:09:50	0.01	1	11.138	After
e	2011-09-08 06:12:36	0.0344444444444444	6	11.14	After
e	2011-09-08 06:16:20	0.285	58	11.154	After
e	2011-09-08 07:45:48	0.463888888888889	58	11.223	After
e	2011-09-08 08:15:30	0.00888888888888889	1	11.225	After
e	2011-09-08 12:17:36	0.118888888888889	2	11.397	After
e	2011-09-08 12:25:20	0.0266666666666667	1	11.399	After
e	2011-09-08 17:39:26	0.0633333333333333	7	11.619	After
e	2011-09-08 17:55:40	0.0622222222222222	8	11.63	After
e	2011-09-09 08:16:04	0.106666666666667	4	12.229	After
e	2011-09-09 08:25:20	0.0511111111111111	3	12.233	After
e	2011-09-09 09:01:38	0.0833333333333333	3	12.26	After
e	2011-09-09 09:06:50	0.0155555555555556	2	12.261	After
e	2011-09-09 13:18:24	0.0133333333333333	1	12.435	After
e	2011-09-09 13:23:40	0.632777777777778	62	12.465	After
e	2011-09-09 14:23:22	0.00777777777777778	2	12.48	After
e	2011-09-09 14:36:40	0.327222222222222	60	12.503	After
e	2011-09-09 19:30:36	0.0866666666666667	3	12.697	After
e	2011-09-10 13:13:40	0.01	2	13.432	After
e	2011-09-10 13:26:50	0.0177777777777778	5	13.441	After
f	2011-08-15 09:54:18	0.327222222222222	46	-12.694	Before
f	2011-08-15 10:56:10	0.176111111111111	3	-12.657	Before
f	2011-08-15 16:39:24	0.313888888888889	42	-12.413	Before
f	2011-08-15 17:03:30	0.307222222222222	42	-12.397	Before
f	2011-08-17 16:52:50	0.180555555555556	48	-10.409	Before
f	2011-08-17 17:06:20	0.256111111111111	50	-10.397	Before
f	2011-08-18 06:42:28	0.472777777777778	50	-9.821	Before
f	2011-08-18 07:23:40	0.543888888888889	50	-9.79	Before
f	2011-08-18 08:17:32	0.530555555555556	50	-9.753	Before
f	2011-08-18 09:11:40	0.472777777777778	50	-9.718	Before
f	2011-08-18 17:24:50	0.322777777777778	40	-9.381	Before
f	2011-08-18 17:48:20	0.340555555555556	40	-9.364	Before
f	2011-08-18 18:13:46	0.353888888888889	36	-9.346	Before
f	2011-08-18 19:16:10	0.307222222222222	40	-9.305	Before
f	2011-08-19 07:33:00	0.463888888888889	38	-8.786	Before
f	2011-08-19 08:36:40	0.336111111111111	38	-8.748	Before
f	2011-08-19 15:00:38	0.262777777777778	42	-8.484	Before
f	2011-08-19 16:26:30	0.00666666666666667	1	-8.435	Before
f	2011-08-20 08:32:14	0.311666666666667	38	-7.752	Before
f	2011-08-20 10:19:10	0.282777777777778	38	-7.679	Before
f	2011-08-21 08:13:06	0.320555555555556	44	-6.765	Before
f	2011-08-21 08:55:10	0.293888888888889	46	-6.736	Before
f	2011-08-21 10:52:22	0.0155555555555556	1	-6.667	Before
f	2011-08-21 11:16:00	0.0933333333333333	1	-6.647	Before
f	2011-08-22 06:59:46	0.422777777777778	50	-5.811	Before
f	2011-08-22 07:28:00	0.200555555555556	5	-5.801	Before
f	2011-08-22 08:34:16	0.468333333333333	52	-5.744	Before
f	2011-08-22 09:36:20	0.393888888888889	52	-5.704	Before
f	2011-08-22 10:13:28	0.385	50	-5.678	Before
f	2011-08-22 10:59:00	0.176111111111111	14	-5.655	Before
f	2011-08-22 17:13:02	0.236111111111111	9	-5.393	Before
f	2011-08-22 17:31:00	0.187222222222222	42	-5.383	Before
f	2011-08-25 09:56:38	0.400555555555556	52	-2.689	Before
f	2011-08-25 10:41:30	0.369444444444444	52	-2.659	Before
f	2011-08-25 18:57:44	0.00666666666666667	3	-2.33	Before
f	2011-08-25 23:53:40	0.11	2	-2.12	Before
f	2011-08-29 09:00:10	0.850555555555556	40	1.29	Departure
f	2011-08-29 10:06:50	0.770555555555556	42	1.333	Departure
f	2011-09-03 10:27:14	0.628333333333333	52	6.341	After
f	2011-09-03 12:43:50	0.0233333333333333	3	6.411	After
f	2011-09-06 06:18:08	0.552777777777778	16	9.165	After
f	2011-09-06 06:54:50	0.409444444444444	56	9.185	After
f	2011-09-06 11:07:50	0.111111111111111	4	9.348	After
f	2011-09-06 11:17:50	0.0711111111111111	2	9.353	After
f	2011-09-07 11:56:28	0.205	42	10.386	After
f	2011-09-07 12:12:50	0.441666666666667	42	10.407	After
f	2011-09-08 09:53:36	0.0144444444444444	1	11.292	After
f	2011-09-08 10:03:50	0.530555555555556	50	11.321	After
f	2011-09-08 12:03:44	0.0122222222222222	1	11.383	After
f	2011-09-08 12:11:00	0.267222222222222	48	11.398	After
f	2011-09-08 13:42:54	0.351666666666667	46	11.466	After
f	2011-09-08 14:05:40	0.02	2	11.468	After
f	2011-09-08 23:52:58	0.293888888888889	3	11.887	After
f	2011-09-09 08:38:40	0.0155555555555556	1	12.24	After
f	2011-09-09 08:40:40	0.00666666666666667	1	12.242	After
f	2011-09-09 14:32:14	0.0311111111111111	1	12.487	After
f	2011-09-09 15:09:40	0.481666666666667	50	12.531	After
f	2011-09-09 16:13:08	0.463888888888889	46	12.575	After
f	2011-09-09 16:42:30	0.0411111111111111	1	12.578	After
g	2011-08-14 06:21:04	0.251666666666667	52	-13.806	Before
g	2011-08-14 06:38:50	0.220555555555556	52	-13.795	Before
g	2011-08-15 06:29:40	0.220555555555556	42	-12.802	Before
g	2011-08-15 06:45:50	0.291666666666667	42	-12.788	Before
g	2011-08-15 08:57:56	0.302777777777778	44	-12.695	Before
g	2011-08-15 09:21:50	0.316111111111111	44	-12.678	Before
g	2011-08-15 18:46:34	0.216111111111111	50	-12.29	Before
g	2011-08-15 19:56:10	0.03	1	-12.25	Before
g	2011-08-17 07:27:56	0.278333333333333	54	-10.759	Before
g	2011-08-17 08:22:20	0.282777777777778	54	-10.721	Before
g	2011-08-17 08:57:52	0.298333333333333	54	-10.696	Before
g	2011-08-17 09:35:40	0.278333333333333	54	-10.67	Before
g	2011-08-17 14:34:42	0.211666666666667	54	-10.465	Before
g	2011-08-17 14:53:40	0.0244444444444444	4	-10.46	Before
g	2011-08-17 18:16:46	0.193888888888889	44	-10.312	Before
g	2011-08-17 18:31:20	0.171666666666667	44	-10.303	Before
g	2011-08-18 15:26:04	0.225	42	-9.429	Before
g	2011-08-18 15:45:30	0.227222222222222	44	-9.415	Before
g	2011-08-18 18:43:52	0.193888888888889	34	-9.293	Before
g	2011-08-18 18:58:30	0.189444444444444	36	-9.283	Before
g	2011-08-18 19:14:32	0.173888888888889	40	-9.272	Before
g	2011-08-19 09:07:04	0.258333333333333	46	-8.691	Before
g	2011-08-19 10:02:40	0.278333333333333	48	-8.651	Before
g	2011-08-20 09:13:58	0.276111111111111	60	-7.685	Before
g	2011-08-20 10:00:30	0.285	62	-7.653	Before
g	2011-08-22 19:39:04	0.196111111111111	17	-5.255	Before
g	2011-08-22 19:51:30	0.0244444444444444	3	-5.253	Before
g	2011-08-23 23:53:32	0.147222222222222	3	-4.08	Before
g	2011-08-24 13:22:56	0.233888888888889	50	-3.514	Before
g	2011-08-24 15:04:40	0.182777777777778	46	-3.446	Before
g	2011-08-25 08:29:14	0.311666666666667	44	-2.715	Before
g	2011-08-25 09:15:30	0.318333333333333	46	-2.682	Before
g	2011-08-26 08:01:28	0.273888888888889	48	-1.736	Approach
g	2011-08-26 08:29:40	0.333888888888889	50	-1.714	Approach
g	2011-08-26 10:45:38	0.0755555555555556	2	-1.63	Approach
g	2011-08-26 11:56:00	0.271666666666667	46	-1.573	Approach
g	2011-08-26 18:03:18	0.182777777777778	48	-1.322	Approach
g	2011-08-26 18:17:20	0.207222222222222	48	-1.311	Approach
g	2011-08-27 14:31:06	0.00777777777777778	3	-0.476	During
g	2011-08-27 14:34:50	0.00888888888888889	1	-0.474	During
g	2011-08-27 17:29:24	0.00777777777777778	1	-0.352	During
g	2011-08-27 17:31:20	0.0477777777777778	2	-0.349	During
g	2011-08-27 18:14:30	0.00666666666666667	1	-0.321	During
g	2011-08-27 18:12:46	0.0277777777777778	2	-0.321	During
g	2011-08-27 18:34:44	0.0122222222222222	1	-0.307	During
g	2011-08-27 18:41:00	0.0122222222222222	2	-0.303	During
g	2011-08-27 19:14:02	0.00888888888888889	1	-0.28	During
g	2011-08-27 19:22:10	0.191666666666667	3	-0.266	During
g	2011-08-28 06:12:34	0.00777777777777778	2	0.178	During
g	2011-08-28 06:15:50	0.00777777777777778	2	0.18	During
g	2011-08-28 06:48:20	0.00777777777777778	2	0.202	During
g	2011-08-28 06:49:20	0.0177777777777778	3	0.204	During
g	2011-08-28 06:55:08	0.01	2	0.207	During
g	2011-08-28 06:56:20	0.0122222222222222	2	0.208	During
g	2011-08-28 11:08:12	0.00666666666666667	1	0.383	During
g	2011-08-28 11:09:00	0.00666666666666667	1	0.383	During
g	2011-08-28 11:52:44	0.0177777777777778	2	0.414	During
g	2011-08-28 12:03:50	0.298333333333333	52	0.434	During
g	2011-08-28 13:58:12	0.983888888888889	54	0.542	Departure
g	2011-08-28 15:02:30	0.881666666666667	52	0.582	Departure
g	2011-08-28 19:38:42	0.0177777777777778	2	0.738	Departure
g	2011-08-28 19:39:50	0.0277777777777778	1	0.739	Departure
g	2011-08-29 12:02:36	1.06166666666667	52	1.465	Departure
g	2011-08-29 14:52:40	0.761666666666667	52	1.57	Departure
g	2011-08-29 17:26:42	0.396111111111111	50	1.662	Departure
g	2011-08-29 18:44:10	0.00666666666666667	1	1.699	Departure
g	2011-08-29 23:14:50	1.25722222222222	44	1.94	Departure
g	2011-08-30 11:11:54	0.400555555555556	52	2.402	After
g	2011-08-30 14:33:30	1.05277777777778	54	2.569	After
g	2011-09-02 09:51:12	0.428333333333333	40	5.347	After
g	2011-09-02 10:26:00	0.512777777777778	42	5.375	After
g	2011-09-03 06:07:16	0.00666666666666667	1	6.174	After
g	2011-09-03 06:10:20	0.0533333333333333	1	6.178	After
g	2011-09-03 15:59:18	0.329444444444444	40	6.598	After
g	2011-09-03 16:36:10	0.333888888888889	42	6.624	After
g	2011-09-04 17:47:34	0.153888888888889	66	7.666	After
g	2011-09-06 06:48:06	0.463888888888889	54	9.221	After
g	2011-09-06 07:20:00	0.495	56	9.245	After
g	2011-09-07 14:58:54	0.111111111111111	42	10.547	After
g	2011-09-07 15:51:00	0.01	2	10.579	After
g	2011-09-08 06:09:30	0.00777777777777778	1	11.175	After
g	2011-09-08 06:08:50	0.00666666666666667	1	11.175	After
g	2011-09-08 06:23:36	0.0655555555555556	11	11.188	After
g	2011-09-08 06:28:20	0.0888888888888889	42	11.192	After
g	2011-09-08 17:32:32	0.387222222222222	46	11.666	After
g	2011-09-08 18:39:20	0.0188888888888889	4	11.697	After
g	2011-09-09 06:05:56	0.0533333333333333	2	12.175	After
g	2011-09-09 06:14:40	0.0966666666666667	6	12.183	After
g	2011-09-09 06:38:24	0.105555555555556	32	12.2	After
g	2011-09-09 06:46:00	0.0988888888888889	6	12.205	After
g	2011-09-09 07:07:08	0.102222222222222	7	12.219	After
g	2011-09-09 07:13:20	0.0322222222222222	5	12.221	After
g	2011-09-09 16:57:40	0.00777777777777778	2	12.626	After
g	2011-09-09 17:01:40	0.160555555555556	19	12.635	After
g	2011-09-10 06:59:56	0.14	42	13.216	After
g	2011-09-10 07:12:00	0.265	42	13.23	After
g	2011-09-10 17:15:20	0.592777777777778	42	13.662	After
h	2011-08-14 06:00:10	0.149444444444444	4	-13.878	Before
h	2011-08-14 06:22:30	0.145	42	-13.863	Before
h	2011-08-14 13:54:06	0.169444444444444	42	-13.548	Before
h	2011-08-14 14:09:40	0.202777777777778	42	-13.536	Before
h	2011-08-15 06:56:44	0.327222222222222	46	-12.831	Before
h	2011-08-15 07:22:10	0.428333333333333	44	-12.81	Before
h	2011-08-15 12:00:14	0.04	14	-12.633	Before
h	2011-08-15 12:02:50	0.00666666666666667	2	-12.632	Before
h	2011-08-15 12:03:40	0.167222222222222	3	-12.625	Before
h	2011-08-15 12:15:30	0.125555555555556	6	-12.618	Before
h	2011-08-16 18:58:32	0.0388888888888889	2	-11.342	Before
h	2011-08-16 19:11:50	0.200555555555556	46	-11.326	Before
h	2011-08-17 06:07:18	0.0944444444444444	48	-10.875	Before
h	2011-08-17 06:16:30	0.122222222222222	50	-10.868	Before
h	2011-08-17 08:17:08	0.278333333333333	48	-10.778	Before
h	2011-08-17 09:21:40	0.273888888888889	46	-10.733	Before
h	2011-08-17 12:20:12	0.105555555555556	2	-10.616	Before
h	2011-08-17 12:30:20	0.0477777777777778	6	-10.611	Before
h	2011-08-18 12:19:54	0.249444444444444	40	-9.61	Before
h	2011-08-18 13:23:30	0.209444444444444	38	-9.568	Before
h	2011-08-18 14:24:24	0.231666666666667	40	-9.525	Before
h	2011-08-18 15:24:00	0.242777777777778	40	-9.483	Before
h	2011-08-19 12:57:04	0.193888888888889	44	-8.587	Before
h	2011-08-19 13:41:20	0.236111111111111	44	-8.554	Before
h	2011-08-20 06:50:16	0.0233333333333333	1	-7.849	Before
h	2011-08-20 07:01:10	0.287222222222222	46	-7.83	Before
h	2011-08-22 06:20:50	0.01	1	-5.87	Before
h	2011-08-22 06:18:50	0.0288888888888889	1	-5.87	Before
h	2011-08-22 06:28:48	0.113333333333333	48	-5.86	Before
h	2011-08-22 06:38:20	0.153888888888889	50	-5.851	Before
h	2011-08-23 07:29:48	0.00666666666666667	1	-4.822	Before
h	2011-08-23 07:33:20	0.300555555555556	40	-4.807	Before
h	2011-08-23 07:54:34	0.371666666666667	40	-4.789	Before
h	2011-08-23 08:22:00	0.463888888888889	40	-4.767	Before
h	2011-08-23 11:45:54	0.242777777777778	40	-4.634	Before
h	2011-08-23 12:04:40	0.260555555555556	40	-4.62	Before
h	2011-08-23 19:44:38	0.0122222222222222	1	-4.311	Before
h	2011-08-23 19:50:50	0.127777777777778	2	-4.302	Before
h	2011-08-24 09:14:22	0.207222222222222	42	-3.741	Before
h	2011-08-24 10:49:10	0.196111111111111	38	-3.675	Before
h	2011-08-24 11:05:06	0.258333333333333	38	-3.662	Before
h	2011-08-24 11:44:30	0.245	38	-3.635	Before
h	2011-08-24 16:42:04	0.134444444444444	44	-3.433	Before
h	2011-08-24 16:55:00	0.167222222222222	44	-3.423	Before
h	2011-08-25 14:10:44	0.00888888888888889	1	-2.543	Before
h	2011-08-25 14:11:20	0.0166666666666667	1	-2.543	Before
h	2011-08-26 06:59:46	0.307222222222222	46	-1.83	Approach
h	2011-08-26 07:21:00	0.441666666666667	46	-1.81	Approach
h	2011-08-26 15:08:18	0.00888888888888889	2	-1.503	Approach
h	2011-08-26 15:23:40	0.258333333333333	44	-1.482	Approach
h	2011-08-26 23:55:24	0.13	2	-1.132	Approach
h	2011-08-27 11:30:04	0.178333333333333	40	-0.648	Approach
h	2011-08-27 12:05:20	0.298333333333333	11	-0.618	Approach
h	2011-08-27 12:38:54	0.282777777777778	40	-0.596	Approach
h	2011-08-27 13:06:50	0.285	13	-0.576	Approach
h	2011-08-27 13:28:08	0.0755555555555556	40	-0.57	Approach
h	2011-08-27 14:25:50	0.0755555555555556	9	-0.53	Approach
h	2011-08-27 16:55:46	0.193888888888889	5	-0.421	During
h	2011-08-27 17:10:00	0.187222222222222	4	-0.411	During
h	2011-08-27 17:24:54	0.191666666666667	7	-0.401	During
h	2011-08-27 17:39:20	0.169444444444444	6	-0.392	During
h	2011-08-27 19:46:30	0.0155555555555556	1	-0.31	During
h	2011-08-27 19:47:50	0.00666666666666667	1	-0.309	During
h	2011-08-28 07:58:00	0.0455555555555556	28	0.199	During
h	2011-08-28 08:54:10	0.0888888888888889	40	0.24	During
h	2011-08-28 18:49:18	0.141111111111111	14	0.656	Departure
h	2011-08-29 06:19:40	0.103333333333333	32	1.134	Departure
h	2011-08-29 06:45:56	0.380555555555556	44	1.163	Departure
h	2011-08-29 07:18:00	0.739444444444444	44	1.201	Departure
h	2011-08-29 10:55:46	0.677222222222222	44	1.349	Departure
h	2011-08-29 11:52:10	0.632777777777778	44	1.386	Departure
h	2011-08-30 07:08:54	0.280555555555556	44	2.175	After
h	2011-08-30 07:53:50	0.320555555555556	40	2.208	After
h	2011-08-30 12:56:44	0.137777777777778	38	2.411	After
h	2011-08-30 14:16:10	0.229444444444444	40	2.47	After
h	2011-08-30 19:23:26	0.00777777777777778	3	2.674	After
h	2011-08-31 07:51:38	0.231666666666667	3	3.203	After
h	2011-08-31 08:09:40	0.663888888888889	38	3.233	After
h	2011-08-31 08:55:32	0.797222222222222	36	3.271	After
h	2011-08-31 09:59:40	0.775	40	3.314	After
h	2011-08-31 10:56:18	0.503888888888889	38	3.342	After
h	2011-08-31 12:01:50	0.387222222222222	38	3.383	After
h	2011-08-31 13:00:22	0.121111111111111	38	3.413	After
h	2011-08-31 13:19:40	0.566111111111111	40	3.444	After
h	2011-09-01 14:27:58	0.418333333333333	42	4.486	After
h	2011-09-01 15:35:50	0.238333333333333	40	4.525	After
h	2011-09-02 06:23:06	0.101111111111111	32	5.136	After
h	2011-09-02 06:31:50	0.398333333333333	34	5.154	After
h	2011-09-02 11:16:44	0.382777777777778	38	5.351	After
h	2011-09-02 12:20:20	0.218333333333333	38	5.389	After
h	2011-09-02 15:04:56	0.450555555555556	32	5.513	After
h	2011-09-02 16:11:00	0.269444444444444	40	5.551	After
h	2011-09-03 13:14:58	0.103333333333333	38	6.422	After
h	2011-09-03 15:51:00	0.0666666666666667	40	6.529	After
h	2011-09-04 15:50:10	0.238333333333333	44	7.535	After
h	2011-09-04 17:56:10	0.02	3	7.614	After
h	2011-09-05 06:12:10	0.13	38	8.129	After
h	2011-09-05 06:23:18	0.329444444444444	42	8.145	After
h	2011-09-05 06:46:40	0.446111111111111	42	8.167	After
h	2011-09-05 08:41:28	0.373888888888889	42	8.243	After
h	2011-09-05 15:24:40	0.160555555555556	40	8.514	After
h	2011-09-05 19:17:40	0.220555555555556	2	8.679	After
h	2011-09-08 12:11:58	0.0988888888888889	38	11.378	After
h	2011-09-08 12:27:40	0.1	40	11.389	After
h	2011-09-08 13:37:28	0.229444444444444	40	11.443	After
h	2011-09-08 15:22:40	0.231666666666667	40	11.516	After
h	2011-09-08 17:35:22	0.0188888888888889	2	11.599	After
h	2011-09-08 17:42:30	0.0611111111111111	8	11.606	After
h	2011-09-08 17:53:38	0.0244444444444444	4	11.612	After
h	2011-09-08 18:00:50	0.0222222222222222	4	11.617	After
h	2011-09-08 18:16:00	0.101111111111111	40	11.631	After
h	2011-09-08 19:03:30	0.06	38	11.662	After
h	2011-09-09 10:53:56	0.0377777777777778	1	12.321	After
h	2011-09-09 11:02:00	0.338333333333333	34	12.339	After
h	2011-09-09 12:31:04	0.01	1	12.388	After
h	2011-09-09 12:32:40	0.00666666666666667	3	12.389	After
h	2011-09-10 06:02:10	0.169444444444444	2	13.124	After
h	2011-09-10 09:58:38	0.393888888888889	42	13.298	After
h	2011-09-10 10:48:30	0.393888888888889	40	13.332	After
h	2011-09-10 13:12:40	0.282777777777778	36	13.428	After
h	2011-09-10 13:55:20	0.360555555555556	38	13.461	After
h	2011-09-10 14:29:14	0.318333333333333	36	13.482	After
h	2011-09-10 16:55:30	0.176111111111111	40	13.578	After
i	2011-08-14 07:27:36	0.0988888888888889	2	-13.742	Before
i	2011-08-14 07:40:00	0.413888888888889	36	-13.721	Before
i	2011-08-14 09:37:10	0.0166666666666667	1	-13.656	Before
i	2011-08-14 09:44:10	0.318333333333333	36	-13.638	Before
i	2011-08-14 10:08:10	0.00666666666666667	1	-13.635	Before
i	2011-08-14 10:07:34	0.00888888888888889	1	-13.635	Before
i	2011-08-14 11:11:26	0.00777777777777778	1	-13.591	Before
i	2011-08-14 11:17:50	0.342777777777778	32	-13.572	Before
i	2011-08-14 12:53:48	0.00666666666666667	1	-13.52	Before
i	2011-08-14 13:24:10	0.00666666666666667	1	-13.499	Before
i	2011-08-15 09:03:28	0.0633333333333333	1	-12.677	Before
i	2011-08-15 09:13:40	0.273888888888889	30	-12.661	Before
i	2011-08-15 19:06:48	0.0488888888888889	9	-12.259	Before
i	2011-08-15 19:10:20	0.0911111111111111	2	-12.255	Before
i	2011-08-16 11:37:32	0.293888888888889	30	-11.561	Before
i	2011-08-16 13:30:20	0.225	38	-11.485	Before
i	2011-08-16 23:51:22	0.282777777777778	10	-11.051	Before
i	2011-08-17 16:18:22	0.269444444444444	32	-10.367	Before
i	2011-08-17 16:38:20	0.311666666666667	32	-10.351	Before
i	2011-08-19 13:18:32	0.242777777777778	36	-8.493	Before
i	2011-08-19 14:32:40	0.00666666666666667	2	-8.451	Before
i	2011-08-19 23:54:00	0.225	7	-8.052	Before
i	2011-08-20 17:46:54	0.245	36	-7.306	Before
i	2011-08-20 18:39:50	0.222777777777778	36	-7.27	Before
i	2011-08-22 08:55:02	0.329444444444444	38	-5.672	Before
i	2011-08-22 09:18:20	0.00666666666666667	1	-5.669	Before
i	2011-08-22 09:19:56	0.00777777777777778	1	-5.668	Before
i	2011-08-22 09:21:00	0.0288888888888889	2	-5.666	Before
i	2011-08-22 09:34:50	0.265	38	-5.647	Before
i	2011-08-22 10:55:30	0.307222222222222	36	-5.589	Before
i	2011-08-23 08:28:20	0.0144444444444444	1	-4.704	Before
i	2011-08-23 08:29:20	0.0122222222222222	1	-4.703	Before
i	2011-08-23 17:00:28	0.0288888888888889	9	-4.347	Before
i	2011-08-23 17:44:10	0.200555555555556	30	-4.31	Before
i	2011-08-24 06:36:40	0.247222222222222	38	-3.772	Before
i	2011-08-24 19:21:00	0.225	7	-3.242	Before
i	2011-08-24 19:37:50	0.225	8	-3.23	Before
i	2011-08-25 06:07:30	0.285	9	-2.79	Before
i	2011-08-25 06:29:00	0.0622222222222222	2	-2.785	Before
i	2011-08-25 09:15:16	0.0588888888888889	2	-2.669	Before
i	2011-08-25 09:23:20	0.307222222222222	34	-2.653	Before
i	2011-08-25 11:31:14	0.293888888888889	32	-2.565	Before
i	2011-08-25 12:29:30	0.0388888888888889	1	-2.535	Before
i	2011-08-25 13:11:54	0.00777777777777778	1	-2.507	Before
i	2011-08-25 13:14:50	0.0122222222222222	1	-2.505	Before
i	2011-08-25 15:04:04	0.289444444444444	9	-2.417	Before
i	2011-08-25 15:32:00	0.258333333333333	8	-2.399	Before
i	2011-08-25 16:35:28	0.251666666666667	40	-2.355	Before
i	2011-08-25 17:26:40	0.0822222222222222	2	-2.327	Before
i	2011-08-25 17:47:20	0.0533333333333333	2	-2.314	Before
i	2011-08-25 17:55:00	0.262777777777778	32	-2.3	Before
i	2011-08-25 19:21:06	0.298333333333333	8	-2.239	Before
i	2011-08-26 07:16:24	0.225	36	-1.745	Approach
i	2011-08-26 07:51:40	0.249444444444444	36	-1.719	Approach
i	2011-08-26 09:33:30	0.00777777777777778	2	-1.659	Approach
i	2011-08-26 09:44:00	0.282777777777778	32	-1.64	Approach
i	2011-08-27 07:48:38	0.01	2	-0.731	Approach
i	2011-08-27 08:09:40	0.01	2	-0.717	Approach
i	2011-08-27 10:29:06	0.0133333333333333	1	-0.62	Approach
i	2011-08-27 10:42:20	0.743888888888889	38	-0.58	Approach
i	2011-08-27 15:05:10	0.0166666666666667	2	-0.428	During
i	2011-08-27 15:07:10	0.00666666666666667	1	-0.427	During
i	2011-08-28 11:32:12	0.0111111111111111	2	0.424	During
i	2011-08-28 11:38:20	0.0244444444444444	3	0.429	During
i	2011-08-28 12:11:44	0.00777777777777778	3	0.451	During
i	2011-08-28 12:12:20	0.0144444444444444	3	0.452	During
i	2011-08-28 19:47:28	0.00777777777777778	1	0.768	Departure
i	2011-08-28 19:48:00	0.0122222222222222	1	0.768	Departure
i	2011-08-29 15:23:02	0.00888888888888889	2	1.584	Departure
i	2011-08-29 15:38:40	0.376111111111111	28	1.61	Departure
i	2011-08-29 17:58:40	0.101111111111111	4	1.696	Departure
i	2011-08-29 18:05:00	0.0155555555555556	2	1.697	Departure
i	2011-08-29 18:06:04	0.0255555555555556	2	1.698	Departure
i	2011-08-29 18:10:20	0.0155555555555556	4	1.701	Departure
i	2011-08-29 18:14:26	0.171666666666667	8	1.71	Departure
i	2011-08-29 18:30:00	0.216111111111111	28	1.723	Departure
i	2011-08-29 19:27:26	0.169444444444444	18	1.76	Departure
i	2011-08-30 06:27:46	0.367222222222222	36	2.227	After
i	2011-08-30 07:12:30	0.530555555555556	36	2.265	After
i	2011-08-30 15:51:00	0.619444444444444	34	2.629	After
i	2011-08-30 16:45:00	0.712777777777778	34	2.67	After
i	2011-08-30 17:39:18	0.517222222222222	32	2.7	After
i	2011-08-30 19:21:30	0.309444444444444	28	2.762	After
i	2011-08-31 13:09:32	0.530555555555556	28	3.513	After
i	2011-08-31 14:18:00	0.619444444444444	32	3.564	After
i	2011-08-31 16:12:46	0.610555555555556	34	3.644	After
i	2011-08-31 17:14:30	0.318333333333333	32	3.674	After
i	2011-09-01 09:24:44	0.240555555555556	34	4.345	After
i	2011-09-01 09:48:00	0.416111111111111	36	4.368	After
i	2011-09-01 23:39:30	0.877222222222222	9	4.965	After
i	2011-09-02 17:55:28	0.0133333333333333	1	5.69	After
i	2011-09-02 18:04:40	0.280555555555556	30	5.708	After
i	2011-09-03 19:20:02	0.00666666666666667	1	6.749	After
i	2011-09-03 19:20:30	0.0177777777777778	1	6.749	After
i	2011-09-04 18:38:16	0.0188888888888889	1	7.72	After
i	2011-09-04 18:40:20	0.0222222222222222	1	7.722	After
i	2011-09-05 11:53:50	0.00666666666666667	1	8.439	After
i	2011-09-05 11:54:30	0.01	1	8.439	After
i	2011-09-06 07:59:50	0.240555555555556	40	9.286	After
i	2011-09-06 08:30:10	0.393888888888889	42	9.313	After
i	2011-09-06 23:30:46	0.495	9	9.943	After
i	2011-09-07 15:54:40	0.101111111111111	36	10.61	After
i	2011-09-07 16:03:00	0.00888888888888889	2	10.612	After
i	2011-09-08 07:10:22	0.376111111111111	36	11.257	After
i	2011-09-08 07:37:40	0.477222222222222	36	11.28	After
i	2011-09-08 19:02:20	0.0377777777777778	12	11.738	After
i	2011-09-08 19:16:30	0.147222222222222	36	11.752	After
i	2011-09-09 06:26:00	0.0244444444444444	2	12.212	After
i	2011-09-09 10:40:50	0.0177777777777778	2	12.388	After
i	2011-09-09 10:48:50	0.0388888888888889	2	12.395	After
i	2011-09-09 17:55:34	0.173888888888889	2	12.697	After
i	2011-09-09 18:08:00	0.01	3	12.699	After
i	2011-09-09 23:50:20	0.200555555555556	11	12.944	After
