# Supplementary material for: Riders on the storm: loggerhead sea turtles detect and respond to a major hurricane in the Northwest Atlantic Ocean
Source: Mov Ecol. 2020 Jul 27;8:32. doi: 10.1186/s40462-020-00218-6 (PMC7385951; doi:10.1186/s40462-020-00218-6)
Supplement: Supplementary file 3 — Additional file 3. Location source for tagged turtles and previously observed proportions of tagged turtles in the Mid-Atlantic Bight by month. [file 40462_2020_218_MOESM3_ESM.zip › Croweetal2020_Ridersonthestorm_location.csv]

ID	D_DATE	LQ	LAT	LON	TIME2DAY0	phase
a	2011-08-14 05:40:16	9	37.2278709411621	-74.901252746582	-13.995	Before
a	2011-08-14 06:58:31	9	37.2194709777832	-74.8967208862305	-13.94	Before
a	2011-08-14 07:59:01	1	37.231	-74.929	-13.898	Before
a	2011-08-14 10:22:32	9	37.2085418701172	-74.9078826904297	-13.799	Before
a	2011-08-14 10:56:49	9	37.205680847168	-74.9143600463867	-13.775	Before
a	2011-08-14 13:55:30	2	37.208	-74.925	-13.651	Before
a	2011-08-14 15:36:37	9	37.2042388916016	-74.9234008789063	-13.58	Before
a	2011-08-14 16:43:09	1	37.206	-74.938	-13.534	Before
a	2011-08-14 17:32:44	1	37.212	-74.902	-13.5	Before
a	2011-08-14 19:19:02	1	37.213	-74.896	-13.426	Before
a	2011-08-15 00:15:34	2	37.259	-74.94	-13.22	Before
a	2011-08-15 00:40:24	3	37.26	-74.939	-13.203	Before
a	2011-08-15 01:14:41	3	37.27	-74.928	-13.179	Before
a	2011-08-15 02:47:36	9	37.275218963623	-74.9076690673828	-13.114	Before
a	2011-08-15 05:27:51	9	37.2680282592773	-74.8752365112305	-13.003	Before
a	2011-08-15 07:41:08	9	37.2517395019531	-74.8665924072266	-12.911	Before
a	2011-08-15 10:04:22	9	37.2346992492676	-74.881950378418	-12.811	Before
a	2011-08-15 10:57:32	2	37.231	-74.893	-12.774	Before
a	2011-08-15 11:49:49	9	37.226390838623	-74.898307800293	-12.738	Before
a	2011-08-15 15:43:06	9	37.2376594543457	-74.9314804077148	-12.576	Before
a	2011-08-15 21:36:44	9	37.2413215637207	-74.925407409668	-12.33	Before
a	2011-08-16 02:00:55	1	37.237	-74.918	-12.147	Before
a	2011-08-16 09:12:13	9	37.1987113952637	-74.9685668945313	-11.847	Before
a	2011-08-16 10:34:20	2	37.199	-74.986	-11.79	Before
a	2011-08-16 11:01:19	9	37.1988105773926	-74.9917984008789	-11.772	Before
a	2011-08-16 13:27:48	9	37.2113189697266	-74.9930191040039	-11.67	Before
a	2011-08-16 14:27:34	2	37.207	-74.982	-11.628	Before
a	2011-08-16 14:48:35	9	37.2130889892578	-74.9723510742188	-11.614	Before
a	2011-08-16 16:04:03	1	37.202	-74.956	-11.561	Before
a	2011-08-16 16:28:39	9	37.2032890319824	-74.9406967163086	-11.544	Before
a	2011-08-16 20:26:10	9	37.1809501647949	-74.923210144043	-11.379	Before
a	2011-08-17 00:05:13	9	37.1685981750488	-74.9775466918945	-11.227	Before
a	2011-08-17 00:25:51	1	37.17	-74.964	-11.213	Before
a	2011-08-17 00:43:30	9	37.1673393249512	-74.9860229492188	-11.201	Before
a	2011-08-17 01:13:33	9	37.1679916381836	-74.9940490722656	-11.18	Before
a	2011-08-17 02:06:37	1	37.172	-75.019	-11.143	Before
a	2011-08-17 02:54:08	9	37.1669082641602	-75.0166320800781	-11.11	Before
a	2011-08-17 04:25:24	9	37.1700210571289	-75.0317306518555	-11.047	Before
a	2011-08-17 06:39:09	9	37.1774215698242	-75.045051574707	-10.954	Before
a	2011-08-17 09:23:20	9	37.1928405761719	-75.0609664916992	-10.84	Before
a	2011-08-17 10:04:10	1	37.175	-75.007	-10.811	Before
a	2011-08-17 11:18:11	9	37.2017097473145	-75.0572662353516	-10.76	Before
a	2011-08-17 12:36:07	9	37.2089004516602	-75.0546493530273	-10.706	Before
a	2011-08-17 13:06:08	9	37.213809967041	-75.0492782592773	-10.685	Before
a	2011-08-17 15:20:36	9	37.2260398864746	-75.0217208862305	-10.592	Before
a	2011-08-17 15:41:23	2	37.22	-75.023	-10.577	Before
a	2011-08-17 17:30:22	9	37.2279586791992	-74.9974670410156	-10.501	Before
a	2011-08-17 18:01:04	9	37.230598449707	-74.9947891235352	-10.48	Before
a	2011-08-17 18:39:00	9	37.2344703674316	-74.9906921386719	-10.454	Before
a	2011-08-17 20:48:52	9	37.2423286437988	-75.0010604858398	-10.364	Before
a	2011-08-18 00:03:33	3	37.26	-75.047	-10.228	Before
a	2011-08-18 01:05:27	9	37.266471862793	-75.0599517822266	-10.185	Before
a	2011-08-18 01:41:43	9	37.2710800170898	-75.0677032470703	-10.16	Before
a	2011-08-18 02:15:13	9	37.2764282226563	-75.0738983154297	-10.137	Before
a	2011-08-18 02:47:18	9	37.2833290100098	-75.0788726806641	-10.115	Before
a	2011-08-18 07:14:51	3	37.342	-75.056	-9.929	Before
a	2011-08-18 09:43:31	1	37.348	-75.027	-9.826	Before
a	2011-08-18 11:32:42	9	37.3565483093262	-75.0076675415039	-9.75	Before
a	2011-08-18 12:08:21	2	37.355	-75	-9.725	Before
a	2011-08-18 13:40:45	2	37.356	-74.98	-9.661	Before
a	2011-08-18 14:11:36	9	37.358699798584	-74.9849700927734	-9.639	Before
a	2011-08-18 15:13:32	9	37.3610191345215	-74.9843597412109	-9.596	Before
a	2011-08-18 20:39:04	9	37.3686599731445	-74.9426116943359	-9.37	Before
a	2011-08-19 01:18:36	9	37.4201698303223	-74.9329299926758	-9.176	Before
a	2011-08-19 01:52:18	9	37.4242782592773	-74.9268493652344	-9.153	Before
a	2011-08-19 05:24:44	1	37.443	-74.886	-9.005	Before
a	2011-08-19 14:59:45	2	37.367	-74.841	-8.606	Before
a	2011-08-19 15:18:48	9	37.3570594787598	-74.8089218139648	-8.593	Before
a	2011-08-19 16:31:49	9	37.3521003723145	-74.8100204467773	-8.542	Before
a	2011-08-19 18:33:41	1	37.333	-74.861	-8.457	Before
a	2011-08-19 19:26:49	9	37.3385887145996	-74.8059692382813	-8.421	Before
a	2011-08-19 19:59:19	9	37.3351211547852	-74.806022644043	-8.398	Before
a	2011-08-20 00:35:42	2	37.327	-74.822	-8.206	Before
a	2011-08-20 02:13:16	9	37.3217391967773	-74.8187713623047	-8.138	Before
a	2011-08-20 02:43:48	9	37.3213081359863	-74.8185119628906	-8.117	Before
a	2011-08-20 03:13:52	9	37.320671081543	-74.8188705444336	-8.096	Before
a	2011-08-20 05:15:32	2	37.314	-74.809	-8.012	Before
a	2011-08-20 06:30:18	9	37.3016395568848	-74.7988662719727	-7.96	Before
a	2011-08-20 08:19:18	9	37.2794990539551	-74.7862014770508	-7.884	Before
a	2011-08-20 08:36:02	2	37.277	-74.782	-7.873	Before
a	2011-08-20 08:55:08	9	37.2720985412598	-74.7867813110352	-7.859	Before
a	2011-08-20 08:56:20	2	37.272	-74.786	-7.858	Before
a	2011-08-20 09:27:56	9	37.2654800415039	-74.7862319946289	-7.836	Before
a	2011-08-20 09:58:31	9	37.2597618103027	-74.7860794067383	-7.815	Before
a	2011-08-20 10:28:57	9	37.2524299621582	-74.7874298095703	-7.794	Before
a	2011-08-20 11:03:46	9	37.2486610412598	-74.7911605834961	-7.77	Before
a	2011-08-20 12:54:36	9	37.2337188720703	-74.8124465942383	-7.693	Before
a	2011-08-20 13:59:41	9	37.2270393371582	-74.8281631469727	-7.648	Before
a	2011-08-20 14:29:49	9	37.2262191772461	-74.8351364135742	-7.627	Before
a	2011-08-20 14:40:55	3	37.224	-74.836	-7.619	Before
a	2011-08-20 17:59:44	9	37.2211112976074	-74.8551406860352	-7.481	Before
a	2011-08-20 18:24:11	1	37.218	-74.89	-7.464	Before
a	2011-08-20 19:44:12	9	37.2210884094238	-74.865966796875	-7.408	Before
a	2011-08-20 21:04:42	9	37.2216606140137	-74.8758010864258	-7.353	Before
a	2011-08-21 00:15:38	2	37.226	-74.89	-7.22	Before
a	2011-08-21 00:31:22	2	37.228	-74.89	-7.209	Before
a	2011-08-21 01:31:41	9	37.2248001098633	-74.8914566040039	-7.167	Before
a	2011-08-21 02:32:25	9	37.2211494445801	-74.8948974609375	-7.125	Before
a	2011-08-21 07:49:16	9	37.204158782959	-74.9001617431641	-6.905	Before
a	2011-08-21 09:54:17	1	37.197	-74.912	-6.818	Before
a	2011-08-21 11:26:45	9	37.1972503662109	-74.900749206543	-6.754	Before
a	2011-08-21 14:11:04	9	37.197338104248	-74.9172515869141	-6.64	Before
a	2011-08-21 18:45:04	9	37.2153816223145	-74.9336624145508	-6.45	Before
a	2011-08-21 19:38:10	9	37.2210083007813	-74.9256210327148	-6.413	Before
a	2011-08-21 21:17:37	9	37.2227897644043	-74.9136428833008	-6.344	Before
a	2011-08-21 22:22:08	9	37.227668762207	-74.9011306762695	-6.299	Before
a	2011-08-22 00:10:22	2	37.234	-74.885	-6.224	Before
a	2011-08-22 00:38:12	1	37.234	-74.88	-6.204	Before
a	2011-08-22 03:23:11	9	37.2371406555176	-74.8545837402344	-6.09	Before
a	2011-08-22 06:41:02	3	37.226	-74.818	-5.952	Before
a	2011-08-22 18:02:36	1	37.186	-74.835	-5.479	Before
a	2011-08-22 20:00:16	9	37.1917991638184	-74.8907012939453	-5.397	Before
a	2011-08-23 00:18:37	9	37.2216300964355	-74.9182662963867	-5.218	Before
a	2011-08-23 00:48:44	9	37.2228202819824	-74.9176330566406	-5.197	Before
a	2011-08-23 01:30:38	1	37.223	-74.919	-5.168	Before
a	2011-08-23 05:56:39	9	37.2191505432129	-74.8951187133789	-4.983	Before
a	2011-08-23 06:21:07	1	37.215	-74.891	-4.966	Before
a	2011-08-23 08:17:39	9	37.1966781616211	-74.8876190185547	-4.885	Before
a	2011-08-23 13:12:45	9	37.1828308105469	-74.9219970703125	-4.68	Before
a	2011-08-23 13:37:14	1	37.157	-74.917	-4.663	Before
a	2011-08-23 18:47:39	9	37.2183685302734	-74.9673690795898	-4.448	Before
a	2011-08-23 19:10:21	1	37.208	-74.998	-4.432	Before
a	2011-08-24 00:10:23	1	37.204	-74.94	-4.224	Before
a	2011-08-24 00:56:08	9	37.2025184631348	-74.9196090698242	-4.192	Before
a	2011-08-24 01:29:36	9	37.1983909606934	-74.9155578613281	-4.169	Before
a	2011-08-24 02:39:07	1	37.19	-74.914	-4.12	Before
a	2011-08-24 04:20:12	9	37.1729507446289	-74.9157485961914	-4.05	Before
a	2011-08-24 04:54:20	9	37.1681098937988	-74.9197006225586	-4.026	Before
a	2011-08-24 07:55:30	3	37.149	-74.939	-3.901	Before
a	2011-08-24 13:59:27	9	37.159839630127	-74.9254913330078	-3.648	Before
a	2011-08-24 16:00:48	1	37.163	-74.927	-3.564	Before
a	2011-08-24 17:30:31	1	37.209	-74.932	-3.501	Before
a	2011-08-24 19:10:04	1	37.218	-74.884	-3.432	Before
a	2011-08-25 00:33:36	2	37.22	-74.922	-3.208	Before
a	2011-08-25 00:38:20	2	37.22	-74.919	-3.204	Before
a	2011-08-25 01:06:18	9	37.2184791564941	-74.9224014282227	-3.185	Before
a	2011-08-25 02:18:45	9	37.2181816101074	-74.9201889038086	-3.135	Before
a	2011-08-25 02:56:13	9	37.2183799743652	-74.9200973510742	-3.108	Before
a	2011-08-25 09:40:48	9	37.2583312988281	-74.9396514892578	-2.828	Before
a	2011-08-25 12:54:15	1	37.293	-74.85	-2.693	Before
a	2011-08-25 14:03:02	1	37.291	-74.9	-2.645	Before
a	2011-08-25 15:21:36	9	37.2885284423828	-74.8667526245117	-2.591	Before
a	2011-08-25 16:22:13	9	37.2907295227051	-74.8545379638672	-2.549	Before
a	2011-08-25 18:21:39	9	37.2988395690918	-74.8513717651367	-2.466	Before
a	2011-08-26 00:29:17	9	37.3515396118164	-74.8834915161133	-2.211	Before
a	2011-08-26 01:27:23	1	37.359	-74.815	-2.17	Before
a	2011-08-26 05:56:33	9	37.3938903808594	-74.8181991577148	-1.983	Approach
a	2011-08-26 10:38:14	9	37.4040107727051	-74.7789993286133	-1.788	Approach
a	2011-08-26 11:27:36	1	37.421	-74.774	-1.753	Approach
a	2011-08-26 14:09:58	1	37.414	-74.778	-1.641	Approach
a	2011-08-26 17:19:19	2	37.396	-74.82	-1.509	Approach
a	2011-08-26 18:59:48	9	37.4159812927246	-74.8648071289063	-1.439	Approach
a	2011-08-26 19:04:20	3	37.418	-74.863	-1.436	Approach
a	2011-08-26 22:04:57	9	37.4613418579102	-74.8732681274414	-1.311	Approach
a	2011-08-26 23:52:19	2	37.49	-74.855	-1.236	Approach
a	2011-08-27 05:47:23	1	37.486	-74.798	-0.99	Approach
a	2011-08-27 09:22:58	2	37.479	-74.827	-0.84	Approach
a	2011-08-27 11:55:39	1	37.496	-74.833	-0.734	Approach
a	2011-08-27 13:36:55	1	37.513	-74.83	-0.664	Approach
a	2011-08-27 16:25:58	9	37.5560417175293	-74.844841003418	-0.546	Approach
a	2011-08-27 20:14:48	9	37.6364707946777	-74.8653335571289	-0.387	During
a	2011-08-27 20:47:27	9	37.6459693908691	-74.868049621582	-0.365	During
a	2011-08-27 21:30:47	9	37.6614685058594	-74.8736572265625	-0.334	During
a	2011-08-27 23:24:43	1	37.705	-74.887	-0.255	During
a	2011-08-27 23:36:34	1	37.706	-74.894	-0.247	During
a	2011-08-28 00:36:39	9	37.7238693237305	-74.8770904541016	-0.205	During
a	2011-08-28 01:14:16	1	37.735	-74.887	-0.179	During
a	2011-08-28 02:51:18	9	37.7481307983398	-74.8650207519531	-0.112	During
a	2011-08-28 05:32:26	1	37.775	-74.871	0	During
a	2011-08-28 07:51:27	9	37.7995109558105	-74.836051940918	0.097	During
a	2011-08-28 09:51:40	9	37.8198890686035	-74.7903137207031	0.18	During
a	2011-08-28 10:35:52	9	37.8277206420898	-74.7666397094727	0.211	During
a	2011-08-28 12:41:43	9	37.8370895385742	-74.698486328125	0.298	During
a	2011-08-28 19:57:12	9	37.8040809631348	-74.7196426391602	0.601	Departure
a	2011-08-28 21:01:40	9	37.8074607849121	-74.7440567016602	0.645	Departure
a	2011-08-28 21:53:00	9	37.8114013671875	-74.7642288208008	0.681	Departure
a	2011-08-28 23:01:45	9	37.8178405761719	-74.7839508056641	0.729	Departure
a	2011-08-29 01:45:27	9	37.848518371582	-74.8111572265625	0.842	Departure
a	2011-08-29 05:53:49	9	37.8528289794922	-74.8230133056641	1.015	Departure
a	2011-08-29 13:30:21	9	37.8065185546875	-74.8961715698242	1.332	Departure
a	2011-08-29 16:08:57	9	37.7722091674805	-74.9196319580078	1.442	Departure
a	2011-08-29 17:44:10	9	37.7535591125488	-74.9247283935547	1.508	Departure
a	2011-08-29 18:27:18	9	37.7471313476563	-74.9317092895508	1.538	Departure
a	2011-08-29 20:38:04	9	37.7488288879395	-74.9396896362305	1.629	Departure
a	2011-08-30 00:33:46	9	37.7756805419922	-74.9417190551758	1.793	Departure
a	2011-08-30 01:27:41	9	37.7789001464844	-74.9305267333984	1.83	Departure
a	2011-08-30 02:13:17	9	37.7790908813477	-74.9190521240234	1.862	Departure
a	2011-08-30 04:03:16	9	37.7676315307617	-74.8938522338867	1.938	Departure
a	2011-08-30 04:35:36	9	37.7621116638184	-74.8877487182617	1.961	Departure
a	2011-08-30 05:10:33	9	37.7554206848145	-74.8820037841797	1.985	Departure
a	2011-08-30 06:47:17	9	37.7274208068848	-74.8702697753906	2.052	After
a	2011-08-30 08:06:08	9	37.7085189819336	-74.8763809204102	2.107	After
a	2011-08-30 12:25:13	9	37.6563987731934	-74.8870010375977	2.287	After
a	2011-08-30 12:57:38	9	37.653980255127	-74.8843765258789	2.309	After
a	2011-08-30 13:49:39	9	37.6481018066406	-74.8826217651367	2.345	After
a	2011-08-30 14:31:31	9	37.6467704772949	-74.8776473999023	2.374	After
a	2011-08-30 15:08:47	9	37.6445007324219	-74.8748779296875	2.4	After
a	2011-08-30 16:30:51	9	37.6366004943848	-74.8706665039063	2.457	After
a	2011-08-30 16:43:06	2	37.644	-74.884	2.466	After
a	2011-08-30 18:51:35	9	37.6267318725586	-74.8509292602539	2.555	After
a	2011-08-30 19:54:48	9	37.6237907409668	-74.8447036743164	2.599	After
a	2011-08-30 20:32:04	9	37.6199111938477	-74.843391418457	2.625	After
a	2011-08-30 21:27:30	9	37.6158981323242	-74.8397598266602	2.663	After
a	2011-08-31 00:26:11	1	37.6	-74.86	2.787	After
a	2011-08-31 01:46:08	1	37.607	-74.849	2.843	After
a	2011-08-31 06:40:02	3	37.556	-74.803	3.047	After
a	2011-08-31 09:44:02	1	37.516	-74.817	3.175	After
a	2011-08-31 10:37:29	9	37.5075912475586	-74.8567428588867	3.212	After
a	2011-08-31 11:18:59	9	37.5045394897461	-74.8634414672852	3.241	After
a	2011-08-31 11:59:23	9	37.501880645752	-74.8632965087891	3.269	After
a	2011-08-31 12:35:55	9	37.5000381469727	-74.8608322143555	3.294	After
a	2011-08-31 14:31:52	1	37.501	-74.883	3.375	After
a	2011-08-31 15:47:20	1	37.51	-74.876	3.427	After
a	2011-08-31 19:32:20	1	37.481	-74.835	3.583	After
a	2011-08-31 19:50:49	2	37.478	-74.83	3.596	After
a	2011-08-31 22:34:06	1	37.467	-74.829	3.709	After
a	2011-09-01 00:26:18	9	37.4512214660645	-74.87158203125	3.787	After
a	2011-09-01 01:02:12	9	37.4492988586426	-74.8817672729492	3.812	After
a	2011-09-01 01:13:53	2	37.447	-74.885	3.82	After
a	2011-09-01 01:26:04	2	37.446	-74.886	3.829	After
a	2011-09-01 03:38:00	9	37.4379806518555	-74.9149780273438	3.921	After
a	2011-09-01 05:26:56	9	37.4285888671875	-74.9350280761719	3.996	After
a	2011-09-01 09:47:45	9	37.4182891845703	-75.0058898925781	4.177	After
a	2011-09-01 14:59:47	9	37.4193115234375	-75.056999206543	4.394	After
a	2011-09-01 15:10:26	1	37.426	-75.063	4.401	After
a	2011-09-01 15:25:16	1	37.429	-75.058	4.412	After
a	2011-09-01 16:14:48	1	37.426	-75.024	4.446	After
a	2011-09-01 18:03:36	9	37.4136810302734	-75.0386123657227	4.522	After
a	2011-09-01 20:25:27	3	37.405	-75.042	4.62	After
a	2011-09-01 21:39:27	9	37.4013786315918	-75.0556716918945	4.672	After
a	2011-09-01 22:05:44	2	37.4	-75.066	4.69	After
a	2011-09-01 23:56:28	9	37.3996086120605	-75.0973129272461	4.767	After
a	2011-09-02 01:58:39	9	37.3971481323242	-75.1294479370117	4.852	After
a	2011-09-02 02:52:07	9	37.3976783752441	-75.1376113891602	4.889	After
a	2011-09-02 03:48:16	9	37.395809173584	-75.1427230834961	4.928	After
a	2011-09-02 04:39:16	9	37.3926887512207	-75.1454315185547	4.963	After
a	2011-09-02 06:00:35	2	37.383	-75.145	5.02	After
a	2011-09-02 06:17:52	3	37.379	-75.144	5.032	After
a	2011-09-02 08:05:14	9	37.3577613830566	-75.1412124633789	5.106	After
a	2011-09-02 10:55:44	9	37.3158493041992	-75.1585998535156	5.225	After
a	2011-09-02 11:30:35	9	37.312068939209	-75.1625137329102	5.249	After
a	2011-09-02 16:09:41	1	37.272	-75.167	5.443	After
a	2011-09-02 16:43:27	9	37.2789497375488	-75.1588668823242	5.466	After
a	2011-09-02 17:14:16	9	37.2807083129883	-75.1562576293945	5.487	After
a	2011-09-02 19:28:49	2	37.289	-75.162	5.581	After
a	2011-09-02 21:14:48	9	37.2930488586426	-75.1338500976563	5.654	After
a	2011-09-02 22:04:22	9	37.2966499328613	-75.1349182128906	5.689	After
a	2011-09-02 22:43:17	9	37.2994689941406	-75.1337738037109	5.716	After
a	2011-09-03 00:38:17	9	37.3040008544922	-75.144172668457	5.796	After
a	2011-09-03 01:34:33	1	37.296	-75.149	5.835	After
a	2011-09-03 02:22:45	9	37.303108215332	-75.1589431762695	5.868	After
a	2011-09-03 05:50:28	1	37.301	-75.165	6.013	After
a	2011-09-03 07:36:11	1	37.314	-75.167	6.086	After
a	2011-09-03 08:16:58	1	37.315	-75.171	6.114	After
a	2011-09-03 10:20:57	9	37.3013801574707	-75.1442794799805	6.2	After
a	2011-09-03 10:55:20	9	37.3050117492676	-75.1421127319336	6.224	After
a	2011-09-03 12:10:36	9	37.3147087097168	-75.1378326416016	6.277	After
a	2011-09-03 12:43:07	9	37.3179817199707	-75.1388626098633	6.299	After
a	2011-09-03 13:15:08	9	37.3192710876465	-75.1362609863281	6.321	After
a	2011-09-03 16:33:29	9	37.3360214233398	-75.1354217529297	6.459	After
a	2011-09-03 17:38:23	1	37.335	-75.139	6.504	After
a	2011-09-03 18:56:37	1	37.346	-75.125	6.558	After
a	2011-09-03 19:18:57	9	37.3484916687012	-75.1225433349609	6.574	After
a	2011-09-03 20:24:31	9	37.352710723877	-75.110237121582	6.62	After
a	2011-09-03 21:12:58	1	37.357	-75.104	6.653	After
a	2011-09-04 00:04:07	3	37.35	-75.088	6.772	After
a	2011-09-04 01:03:54	9	37.3498191833496	-75.0902633666992	6.814	After
a	2011-09-04 01:47:40	9	37.3507995605469	-75.0924606323242	6.844	After
a	2011-09-04 05:32:49	9	37.354808807373	-75.0913314819336	7	After
a	2011-09-04 05:59:28	1	37.354	-75.078	7.019	After
a	2011-09-04 06:33:24	9	37.355640411377	-75.0866088867188	7.042	After
a	2011-09-04 07:09:37	9	37.3564300537109	-75.0839767456055	7.067	After
a	2011-09-04 07:49:28	9	37.356990814209	-75.0814208984375	7.095	After
a	2011-09-04 08:26:16	9	37.3573989868164	-75.0784912109375	7.121	After
a	2011-09-04 16:17:19	9	37.3388595581055	-75.0280227661133	7.448	After
a	2011-09-04 18:43:01	1	37.329	-75.037	7.549	After
a	2011-09-05 01:41:42	2	37.364	-74.935	7.84	After
a	2011-09-05 04:55:56	9	37.3794593811035	-74.940559387207	7.975	After
a	2011-09-05 05:57:14	1	37.369	-74.933	8.017	After
a	2011-09-05 07:57:51	9	37.3948707580566	-74.9274215698242	8.101	After
a	2011-09-05 09:12:39	1	37.394	-74.876	8.153	After
a	2011-09-05 10:51:53	2	37.404	-74.9	8.222	After
a	2011-09-05 11:20:44	9	37.4006195068359	-74.9007797241211	8.242	After
a	2011-09-05 13:53:00	9	37.382740020752	-74.9013366699219	8.348	After
a	2011-09-05 18:37:00	9	37.378360748291	-74.9048690795898	8.545	After
a	2011-09-05 19:07:22	9	37.3830909729004	-74.9059600830078	8.566	After
a	2011-09-05 20:15:55	1	37.394	-74.901	8.614	After
a	2011-09-06 02:15:28	9	37.3856010437012	-74.8880081176758	8.863	After
a	2011-09-06 02:45:29	9	37.3845596313477	-74.885627746582	8.884	After
a	2011-09-06 08:55:39	9	37.3752288818359	-74.8848114013672	9.141	After
a	2011-09-06 09:39:28	9	37.3763313293457	-74.8835220336914	9.172	After
a	2011-09-06 11:34:53	9	37.373908996582	-74.8842697143555	9.252	After
a	2011-09-06 13:27:21	1	37.36	-74.852	9.33	After
a	2011-09-06 15:42:21	9	37.3474006652832	-74.8909912109375	9.424	After
a	2011-09-06 16:34:34	9	37.3428497314453	-74.8945617675781	9.46	After
a	2011-09-06 17:08:15	1	37.344	-74.891	9.483	After
a	2011-09-06 18:42:57	9	37.3422088623047	-74.9007720947266	9.549	After
a	2011-09-07 01:27:05	9	37.3466911315918	-74.8821182250977	9.83	After
a	2011-09-07 02:46:28	2	37.337	-74.878	9.885	After
a	2011-09-07 11:26:36	9	37.3072090148926	-74.8815536499023	10.246	After
a	2011-09-07 12:53:45	2	37.286	-74.861	10.306	After
a	2011-09-07 13:23:11	9	37.2812881469727	-74.864990234375	10.327	After
a	2011-09-07 14:55:15	9	37.2648887634277	-74.869743347168	10.391	After
a	2011-09-07 18:19:57	1	37.256	-74.913	10.533	After
a	2011-09-07 18:36:30	2	37.253	-74.895	10.544	After
a	2011-09-07 20:22:14	9	37.2561492919922	-74.89013671875	10.618	After
a	2011-09-07 22:11:26	9	37.2587013244629	-74.883430480957	10.694	After
a	2011-09-08 00:09:58	2	37.251	-74.872	10.776	After
a	2011-09-08 02:34:55	9	37.2343597412109	-74.8470306396484	10.877	After
a	2011-09-08 03:35:54	9	37.2275886535645	-74.8466720581055	10.919	After
a	2011-09-08 04:46:32	9	37.2222900390625	-74.8508529663086	10.968	After
a	2011-09-08 05:22:08	1	37.218	-74.856	10.993	After
a	2011-09-08 07:12:06	9	37.2105407714844	-74.8569564819336	11.069	After
a	2011-09-08 08:23:16	9	37.2032814025879	-74.858268737793	11.119	After
a	2011-09-08 09:30:29	9	37.1959495544434	-74.8607788085938	11.165	After
a	2011-09-08 10:41:12	9	37.1894493103027	-74.8648529052734	11.214	After
a	2011-09-08 11:47:00	9	37.1844291687012	-74.8714599609375	11.26	After
a	2011-09-08 13:05:31	1	37.158	-74.863	11.315	After
a	2011-09-08 16:32:59	9	37.1799392700195	-74.9324569702148	11.459	After
a	2011-09-08 18:11:04	9	37.1923294067383	-74.9736709594727	11.527	After
a	2011-09-09 00:58:43	9	37.2331581115723	-75.0609512329102	11.81	After
a	2011-09-09 04:24:36	9	37.2174911499023	-75.0693969726563	11.953	After
a	2011-09-09 10:49:34	9	37.1894989013672	-75.1611099243164	12.22	After
a	2011-09-09 12:14:56	9	37.2038612365723	-75.1656875610352	12.28	After
a	2011-09-09 13:30:34	9	37.2075996398926	-75.1595916748047	12.332	After
a	2011-09-09 16:58:37	9	37.2046508789063	-75.1112976074219	12.477	After
a	2011-09-09 17:33:22	9	37.2039985656738	-75.1085662841797	12.501	After
a	2011-09-09 18:17:25	1	37.204	-75.142	12.531	After
a	2011-09-09 18:46:47	9	37.2087783813477	-75.1037902832031	12.552	After
a	2011-09-09 20:35:59	1	37.204	-75.133	12.627	After
a	2011-09-09 21:29:38	9	37.2249183654785	-75.0791397094727	12.665	After
a	2011-09-09 23:33:05	9	37.2422485351563	-75.0740280151367	12.75	After
a	2011-09-10 00:03:52	9	37.2425308227539	-75.073356628418	12.772	After
a	2011-09-10 00:12:16	1	37.243	-75.07	12.778	After
a	2011-09-10 01:42:25	2	37.24	-75.06	12.84	After
a	2011-09-10 03:04:36	9	37.2296905517578	-75.0574569702148	12.897	After
a	2011-09-10 04:19:36	9	37.2215003967285	-75.0553131103516	12.949	After
a	2011-09-10 06:57:33	9	37.2107810974121	-75.0682983398438	13.059	After
a	2011-09-10 08:20:41	9	37.2145881652832	-75.078239440918	13.117	After
a	2011-09-10 09:25:07	9	37.2214317321777	-75.0847473144531	13.162	After
a	2011-09-10 11:09:43	9	37.2369995117188	-75.0797729492188	13.234	After
a	2011-09-10 13:24:58	9	37.250301361084	-75.0341567993164	13.328	After
a	2011-09-10 13:58:11	1	37.257	-75.01	13.351	After
a	2011-09-10 14:33:18	9	37.2473297119141	-75.0206680297852	13.376	After
a	2011-09-10 15:03:59	2	37.257	-75.016	13.397	After
a	2011-09-10 15:33:27	9	37.2466888427734	-75.0045776367188	13.417	After
a	2011-09-10 15:43:45	2	37.259	-74.998	13.425	After
a	2011-09-10 16:24:17	9	37.2475204467773	-74.9940872192383	13.453	After
a	2011-09-10 16:57:48	9	37.2470397949219	-74.9894104003906	13.476	After
a	2011-09-10 17:27:48	9	37.2439613342285	-74.9802780151367	13.497	After
a	2011-09-10 19:24:50	9	37.2529907226563	-74.9641799926758	13.578	After
a	2011-09-10 20:06:12	9	37.2588005065918	-74.960563659668	13.607	After
a	2011-09-10 23:54:59	2	37.282	-74.941	13.766	After
a	2011-09-11 00:43:17	1	37.282	-74.934	13.799	After
a	2011-09-11 01:51:15	9	37.2783508300781	-74.9221572875977	13.846	After
a	2011-09-11 03:57:36	9	37.2721900939941	-74.9160919189453	13.934	After
a	2011-09-11 04:30:44	9	37.2700309753418	-74.9149322509766	13.957	After
a	2011-09-11 05:07:47	9	37.2671394348145	-74.9133377075195	13.983	After
b	2011-08-14 12:58:36	1	38.947	-73.478	-13.837	Before
b	2011-08-14 13:52:13	1	38.98	-73.484	-13.8	Before
b	2011-08-14 14:03:40	9	38.9786987304688	-73.4784774780273	-13.792	Before
b	2011-08-14 17:10:22	9	39.0109901428223	-73.466178894043	-13.662	Before
b	2011-08-14 17:29:33	1	38.996	-73.496	-13.649	Before
b	2011-08-15 02:25:56	9	38.9761199951172	-73.52880859375	-13.277	Before
b	2011-08-15 02:57:40	9	38.9724884033203	-73.5301132202148	-13.255	Before
b	2011-08-15 03:31:55	9	38.9686698913574	-73.5316696166992	-13.231	Before
b	2011-08-15 07:53:08	9	38.9366607666016	-73.547607421875	-13.049	Before
b	2011-08-15 08:23:09	9	38.935230255127	-73.5503082275391	-13.029	Before
b	2011-08-15 10:03:07	9	38.9311218261719	-73.561149597168	-12.959	Before
b	2011-08-15 13:33:41	1	38.927	-73.567	-12.813	Before
b	2011-08-15 14:20:13	1	38.94	-73.579	-12.781	Before
b	2011-08-15 16:40:28	9	38.9328689575195	-73.5556564331055	-12.683	Before
b	2011-08-15 18:48:33	9	38.9329490661621	-73.5416412353516	-12.594	Before
b	2011-08-16 00:47:40	2	38.895	-73.574	-12.345	Before
b	2011-08-16 01:37:08	9	38.8926200866699	-73.5845031738281	-12.311	Before
b	2011-08-16 02:42:24	9	38.8871803283691	-73.5911483764648	-12.265	Before
b	2011-08-16 06:24:05	9	38.8622817993164	-73.6018218994141	-12.111	Before
b	2011-08-16 07:38:32	9	38.8578186035156	-73.6055221557617	-12.06	Before
b	2011-08-16 08:09:00	9	38.8566818237305	-73.6071472167969	-12.038	Before
b	2011-08-16 10:27:07	2	38.855	-73.596	-11.942	Before
b	2011-08-16 12:06:44	9	38.8640518188477	-73.6111602783203	-11.873	Before
b	2011-08-16 14:10:59	2	38.847	-73.611	-11.787	Before
b	2011-08-16 14:13:43	2	38.847	-73.611	-11.785	Before
b	2011-08-16 14:47:00	2	38.866	-73.616	-11.762	Before
b	2011-08-16 15:22:05	9	38.8566017150879	-73.5928115844727	-11.738	Before
b	2011-08-16 16:01:20	9	38.8541603088379	-73.5835571289063	-11.71	Before
b	2011-08-16 16:44:20	9	38.8522987365723	-73.5746383666992	-11.681	Before
b	2011-08-16 21:50:33	1	38.837	-73.6	-11.468	Before
b	2011-08-16 23:07:40	9	38.8357391357422	-73.6402282714844	-11.414	Before
b	2011-08-17 04:31:56	9	38.8563919067383	-73.7335968017578	-11.189	Before
b	2011-08-17 05:06:59	9	38.8576889038086	-73.7336273193359	-11.165	Before
b	2011-08-17 05:46:03	1	38.847	-73.741	-11.138	Before
b	2011-08-17 08:02:32	9	38.8490295410156	-73.718017578125	-11.043	Before
b	2011-08-17 08:37:28	9	38.8440818786621	-73.7135162353516	-11.019	Before
b	2011-08-17 10:02:46	1	38.833	-73.705	-10.959	Before
b	2011-08-17 10:56:55	9	38.8353881835938	-73.6967315673828	-10.922	Before
b	2011-08-17 13:04:16	9	38.8521385192871	-73.7033004760742	-10.833	Before
b	2011-08-17 15:55:06	9	38.8624305725098	-73.6931076049805	-10.715	Before
b	2011-08-17 16:26:29	9	38.8665008544922	-73.6908874511719	-10.693	Before
b	2011-08-17 17:00:12	9	38.8703193664551	-73.690803527832	-10.669	Before
b	2011-08-17 17:32:40	9	38.8743896484375	-73.6878967285156	-10.647	Before
b	2011-08-17 19:11:12	9	38.8923110961914	-73.6838989257813	-10.579	Before
b	2011-08-17 19:52:32	9	38.8947410583496	-73.6758575439453	-10.55	Before
b	2011-08-17 22:46:56	9	38.9122200012207	-73.6587219238281	-10.429	Before
b	2011-08-18 01:16:55	1	38.944	-73.676	-10.325	Before
b	2011-08-18 01:42:37	1	38.946	-73.672	-10.307	Before
b	2011-08-18 07:02:45	3	38.936	-73.626	-10.084	Before
b	2011-08-18 07:15:22	3	38.937	-73.627	-10.076	Before
b	2011-08-18 08:34:20	9	38.9237594604492	-73.6180877685547	-10.021	Before
b	2011-08-18 11:21:13	2	38.918	-73.611	-9.905	Before
b	2011-08-18 12:26:22	2	38.921	-73.609	-9.86	Before
b	2011-08-18 13:40:20	9	38.9236488342285	-73.606086730957	-9.808	Before
b	2011-08-18 14:41:28	9	38.9316482543945	-73.6015396118164	-9.766	Before
b	2011-08-18 15:23:48	9	38.9380912780762	-73.5997619628906	-9.736	Before
b	2011-08-18 15:53:52	9	38.9405708312988	-73.5981292724609	-9.716	Before
b	2011-08-18 16:56:13	9	38.9494285583496	-73.5983581542969	-9.672	Before
b	2011-08-18 17:58:16	9	38.9502792358398	-73.6024322509766	-9.629	Before
b	2011-08-18 23:06:38	9	38.9376487731934	-73.6414184570313	-9.415	Before
b	2011-08-19 00:06:52	9	38.9461708068848	-73.6598129272461	-9.373	Before
b	2011-08-19 00:40:52	9	38.9509811401367	-73.6679000854492	-9.35	Before
b	2011-08-19 06:29:04	9	38.9653015136719	-73.6550674438477	-9.108	Before
b	2011-08-19 07:06:01	2	38.96	-73.652	-9.082	Before
b	2011-08-19 08:01:41	9	38.9543190002441	-73.6428375244141	-9.043	Before
b	2011-08-19 13:13:00	1	38.95	-73.616	-8.827	Before
b	2011-08-19 13:39:26	9	38.9507598876953	-73.6459274291992	-8.809	Before
b	2011-08-19 14:15:56	9	38.9573516845703	-73.6482925415039	-8.784	Before
b	2011-08-19 16:36:36	9	38.9735488891602	-73.6372909545898	-8.686	Before
b	2011-08-19 23:06:50	9	39.0288581848145	-73.5798187255859	-8.415	Before
b	2011-08-19 23:38:40	9	39.0322189331055	-73.5873794555664	-8.393	Before
b	2011-08-20 01:23:24	9	39.0374183654785	-73.6026229858398	-8.32	Before
b	2011-08-20 02:29:36	9	39.0395011901855	-73.6049423217773	-8.274	Before
b	2011-08-20 03:32:37	9	39.0420608520508	-73.6072311401367	-8.23	Before
b	2011-08-20 07:58:12	9	39.0357704162598	-73.6012496948242	-8.046	Before
b	2011-08-20 09:10:43	9	39.0296287536621	-73.5973968505859	-7.996	Before
b	2011-08-20 10:37:39	1	39.027	-73.585	-7.935	Before
b	2011-08-20 11:26:52	9	39.0266990661621	-73.5803604125977	-7.901	Before
b	2011-08-20 11:57:44	9	39.0283813476563	-73.5762634277344	-7.88	Before
b	2011-08-20 13:13:41	1	39.038	-73.539	-7.827	Before
b	2011-08-20 14:37:43	1	39.035	-73.533	-7.768	Before
b	2011-08-20 18:24:49	1	39.03	-73.551	-7.611	Before
b	2011-08-20 19:13:56	9	39.0351982116699	-73.5075836181641	-7.577	Before
b	2011-08-20 20:22:04	9	39.0273895263672	-73.507926940918	-7.529	Before
b	2011-08-21 00:17:01	1	39.024	-73.56	-7.366	Before
b	2011-08-21 00:29:18	2	39.022	-73.557	-7.358	Before
b	2011-08-21 01:21:07	9	39.0212211608887	-73.5740432739258	-7.322	Before
b	2011-08-21 01:52:58	1	39.024	-73.564	-7.3	Before
b	2011-08-21 11:39:12	9	39.0066909790039	-73.5740585327148	-6.892	Before
b	2011-08-21 14:20:11	9	39.0089988708496	-73.5364074707031	-6.781	Before
b	2011-08-21 16:21:00	9	39.0008506774902	-73.52294921875	-6.697	Before
b	2011-08-21 17:29:00	9	38.9945411682129	-73.5232467651367	-6.649	Before
b	2011-08-21 17:59:32	9	38.9949493408203	-73.5265121459961	-6.628	Before
b	2011-08-21 22:20:32	9	38.9845581054688	-73.5606689453125	-6.447	Before
b	2011-08-21 22:58:56	9	38.9782981872559	-73.5679702758789	-6.42	Before
b	2011-08-22 06:16:18	1	38.999	-73.589	-6.117	Before
b	2011-08-22 08:36:44	9	38.990550994873	-73.572883605957	-6.019	Before
b	2011-08-22 19:17:56	9	38.9371604919434	-73.6307983398438	-5.574	Before
b	2011-08-22 22:13:12	9	38.9358215332031	-73.6375885009766	-5.452	Before
b	2011-08-22 22:49:52	9	38.9358901977539	-73.6425094604492	-5.427	Before
b	2011-08-23 00:39:16	9	38.9475898742676	-73.6473007202148	-5.351	Before
b	2011-08-23 02:23:45	9	38.9550895690918	-73.6417922973633	-5.278	Before
b	2011-08-23 02:54:00	9	38.9563293457031	-73.6387100219727	-5.257	Before
b	2011-08-23 04:02:36	9	38.9541511535645	-73.631103515625	-5.209	Before
b	2011-08-23 05:40:40	9	38.947868347168	-73.6202926635742	-5.141	Before
b	2011-08-23 06:21:28	3	38.941	-73.616	-5.113	Before
b	2011-08-23 07:16:15	9	38.9318809509277	-73.60888671875	-5.075	Before
b	2011-08-23 11:45:42	9	38.8927688598633	-73.6014022827148	-4.888	Before
b	2011-08-23 12:15:45	9	38.8913497924805	-73.6010665893555	-4.867	Before
b	2011-08-23 16:09:12	2	38.909	-73.581	-4.705	Before
b	2011-08-23 17:12:44	9	38.9020881652832	-73.6246795654297	-4.661	Before
b	2011-08-23 18:12:48	9	38.9061813354492	-73.6266403198242	-4.619	Before
b	2011-08-23 18:48:44	9	38.9097518920898	-73.6285705566406	-4.594	Before
b	2011-08-23 20:57:28	9	38.9266090393066	-73.613639831543	-4.505	Before
b	2011-08-23 22:06:08	9	38.9221000671387	-73.6141662597656	-4.457	Before
b	2011-08-24 00:16:16	9	38.9111099243164	-73.6167373657227	-4.367	Before
b	2011-08-24 00:52:00	9	38.9063606262207	-73.6126098632813	-4.342	Before
b	2011-08-24 02:28:16	9	38.8933296203613	-73.6093063354492	-4.275	Before
b	2011-08-24 03:59:05	9	38.8787803649902	-73.6175079345703	-4.212	Before
b	2011-08-24 04:29:20	9	38.8744888305664	-73.6228485107422	-4.191	Before
b	2011-08-24 05:03:23	9	38.8706398010254	-73.6312866210938	-4.167	Before
b	2011-08-24 07:11:17	9	38.8676795959473	-73.6641464233398	-4.078	Before
b	2011-08-24 07:34:43	1	38.858	-73.625	-4.062	Before
b	2011-08-24 08:13:13	9	38.8708114624023	-73.674201965332	-4.035	Before
b	2011-08-24 08:43:16	9	38.8723487854004	-73.67822265625	-4.015	Before
b	2011-08-24 10:17:16	9	38.8806610107422	-73.6763305664063	-3.949	Before
b	2011-08-24 10:50:28	9	38.8863182067871	-73.674201965332	-3.926	Before
b	2011-08-24 11:50:36	9	38.8922386169434	-73.6688232421875	-3.884	Before
b	2011-08-24 12:21:18	9	38.8939208984375	-73.6643981933594	-3.863	Before
b	2011-08-24 13:13:11	2	38.891	-73.638	-3.827	Before
b	2011-08-24 14:07:43	9	38.8984794616699	-73.6464691162109	-3.789	Before
b	2011-08-24 17:18:39	9	38.8996315002441	-73.6074981689453	-3.657	Before
b	2011-08-24 23:26:59	9	38.8845405578613	-73.6510467529297	-3.401	Before
b	2011-08-24 23:58:53	1	38.891	-73.634	-3.379	Before
b	2011-08-25 00:27:12	9	38.8812217712402	-73.6672821044922	-3.359	Before
b	2011-08-25 00:57:52	9	38.8797187805176	-73.675048828125	-3.338	Before
b	2011-08-25 01:27:56	9	38.8791007995605	-73.6815567016602	-3.317	Before
b	2011-08-25 03:07:29	9	38.8830718994141	-73.7034683227539	-3.248	Before
b	2011-08-25 05:16:16	9	38.9042015075684	-73.7244262695313	-3.158	Before
b	2011-08-25 14:35:57	9	38.9417610168457	-73.6183929443359	-2.77	Before
b	2011-08-25 20:07:32	9	38.9155502319336	-73.6360778808594	-2.539	Before
b	2011-08-25 23:31:24	9	38.9468193054199	-73.650993347168	-2.398	Before
b	2011-08-26 00:15:54	2	38.953	-73.652	-2.367	Before
b	2011-08-26 01:55:00	9	38.9634590148926	-73.6363372802734	-2.298	Before
b	2011-08-26 03:42:28	9	38.9764785766602	-73.6173934936523	-2.223	Before
b	2011-08-26 07:14:43	1	39.005	-73.58	-2.076	Before
b	2011-08-26 10:00:28	9	38.9875106811523	-73.5153732299805	-1.961	Approach
b	2011-08-26 10:46:35	9	38.9866600036621	-73.5046615600586	-1.929	Approach
b	2011-08-26 11:32:52	9	38.986400604248	-73.4931030273438	-1.897	Approach
b	2011-08-26 14:13:05	2	38.981	-73.496	-1.786	Approach
b	2011-08-26 16:29:52	9	38.9825706481934	-73.4967727661133	-1.691	Approach
b	2011-08-26 19:03:24	9	39.0057182312012	-73.5149307250977	-1.584	Approach
b	2011-08-26 19:35:56	2	39.011	-73.514	-1.561	Approach
b	2011-08-27 00:11:33	9	39.0868682861328	-73.4966201782227	-1.37	Approach
b	2011-08-27 03:06:12	9	39.1031799316406	-73.4635009765625	-1.249	Approach
b	2011-08-27 04:59:40	9	39.1109809875488	-73.4500732421875	-1.17	Approach
b	2011-08-27 06:38:13	9	39.112190246582	-73.4413986206055	-1.101	Approach
b	2011-08-27 07:03:21	1	39.11	-73.476	-1.084	Approach
b	2011-08-27 11:08:27	1	39.116	-73.452	-0.914	Approach
b	2011-08-27 12:02:41	1	39.1	-73.451	-0.876	Approach
b	2011-08-27 14:54:40	9	39.103328704834	-73.4765014648438	-0.757	Approach
b	2011-08-27 15:36:56	1	39.098	-73.484	-0.727	Approach
b	2011-08-27 17:16:14	1	39.096	-73.476	-0.658	Approach
b	2011-08-28 00:18:48	9	39.1069984436035	-73.5514297485352	-0.365	During
b	2011-08-28 04:34:52	9	39.1577682495117	-73.6010894775391	-0.187	During
b	2011-08-28 05:05:04	9	39.1668014526367	-73.6078186035156	-0.166	During
b	2011-08-28 08:36:50	1	39.197	-73.612	-0.019	During
b	2011-08-28 09:04:16	1	39.192	-73.604	0	During
b	2011-08-28 09:48:49	9	39.206169128418	-73.5890197753906	0.031	During
b	2011-08-28 10:38:40	9	39.218578338623	-73.5676116943359	0.066	During
b	2011-08-28 12:56:39	9	39.236328125	-73.475830078125	0.161	During
b	2011-08-28 19:03:54	9	39.1770286560059	-73.3190689086914	0.416	During
b	2011-08-28 22:53:26	9	39.1791114807129	-73.3450698852539	0.576	Departure
b	2011-08-29 01:25:00	9	39.1954498291016	-73.3612899780273	0.681	Departure
b	2011-08-29 05:25:18	1	39.199	-73.386	0.848	Departure
b	2011-08-29 06:41:18	1	39.217	-73.375	0.901	Departure
b	2011-08-29 10:05:18	9	39.2418594360352	-73.4018783569336	1.042	Departure
b	2011-08-29 10:44:40	9	39.2463989257813	-73.4022216796875	1.07	Departure
b	2011-08-29 13:00:16	2	39.257	-73.395	1.164	Departure
b	2011-08-29 14:55:52	9	39.247859954834	-73.3839111328125	1.244	Departure
b	2011-08-29 16:07:21	9	39.2381782531738	-73.3811416625977	1.294	Departure
b	2011-08-29 18:27:59	2	39.22	-73.38	1.391	Departure
b	2011-08-29 19:16:50	9	39.2174911499023	-73.3938217163086	1.425	Departure
b	2011-08-30 00:13:35	9	39.2404518127441	-73.4842987060547	1.631	Departure
b	2011-08-30 00:54:21	9	39.2462005615234	-73.4899826049805	1.66	Departure
b	2011-08-30 01:30:14	9	39.2499084472656	-73.492073059082	1.685	Departure
b	2011-08-30 02:04:04	9	39.2521018981934	-73.4922714233398	1.708	Departure
b	2011-08-30 03:57:14	9	39.2526702880859	-73.4902191162109	1.787	Departure
b	2011-08-30 07:26:31	9	39.2510414123535	-73.4940795898438	1.932	Departure
b	2011-08-30 08:36:15	1	39.26	-73.499	1.981	Departure
b	2011-08-30 09:58:25	2	39.262	-73.513	2.038	After
b	2011-08-30 11:07:21	9	39.277099609375	-73.5086898803711	2.085	After
b	2011-08-30 14:20:40	2	39.28	-73.485	2.22	After
b	2011-08-30 16:08:12	2	39.271	-73.462	2.294	After
b	2011-08-30 19:17:22	9	39.237548828125	-73.4652709960938	2.426	After
b	2011-08-30 20:55:17	9	39.2372398376465	-73.4723892211914	2.494	After
b	2011-08-31 00:27:30	2	39.268	-73.463	2.641	After
b	2011-08-31 05:05:49	9	39.2740516662598	-73.4216537475586	2.834	After
b	2011-08-31 06:27:14	1	39.266	-73.462	2.891	After
b	2011-08-31 08:19:56	1	39.271	-73.436	2.969	After
b	2011-08-31 09:01:43	9	39.2710189819336	-73.4321670532227	2.998	After
b	2011-08-31 10:27:17	9	39.2753715515137	-73.4451217651367	3.058	After
b	2011-08-31 11:48:27	9	39.2839889526367	-73.4469909667969	3.114	After
b	2011-08-31 12:30:59	9	39.2902984619141	-73.4448776245117	3.144	After
b	2011-08-31 14:13:44	3	39.3	-73.438	3.215	After
b	2011-08-31 14:28:00	9	39.3013000488281	-73.4360809326172	3.225	After
b	2011-08-31 14:31:51	1	39.303	-73.433	3.227	After
b	2011-08-31 16:21:58	9	39.302490234375	-73.4186096191406	3.304	After
b	2011-08-31 16:28:53	2	39.3	-73.416	3.309	After
b	2011-08-31 18:26:52	9	39.2967987060547	-73.3950271606445	3.391	After
b	2011-08-31 20:51:03	2	39.282	-73.381	3.491	After
b	2011-08-31 22:37:44	9	39.2826385498047	-73.3744735717773	3.565	After
b	2011-09-01 00:35:21	9	39.2831115722656	-73.371696472168	3.647	After
b	2011-09-01 01:14:57	2	39.285	-73.378	3.674	After
b	2011-09-01 08:04:00	9	39.2929382324219	-73.3674621582031	3.958	After
b	2011-09-01 09:29:20	9	39.289421081543	-73.3708419799805	4.017	After
b	2011-09-01 11:53:38	2	39.29	-73.39	4.118	After
b	2011-09-01 15:24:14	9	39.2962799072266	-73.3544616699219	4.264	After
b	2011-09-01 17:40:41	1	39.289	-73.333	4.359	After
b	2011-09-01 18:03:40	1	39.294	-73.328	4.375	After
b	2011-09-01 18:30:15	9	39.2882385253906	-73.3269119262695	4.393	After
b	2011-09-01 19:58:08	9	39.2761001586914	-73.3348236083984	4.454	After
b	2011-09-01 20:26:08	2	39.277	-73.342	4.474	After
b	2011-09-01 22:31:23	1	39.271	-73.365	4.56	After
b	2011-09-02 03:12:11	9	39.2810401916504	-73.4358520507813	4.755	After
b	2011-09-02 05:22:24	9	39.2764587402344	-73.4449920654297	4.846	After
b	2011-09-02 06:19:25	3	39.273	-73.449	4.886	After
b	2011-09-02 06:22:21	9	39.2732200622559	-73.4473266601563	4.888	After
b	2011-09-02 07:47:23	1	39.273	-73.46	4.947	After
b	2011-09-02 09:17:51	9	39.2518081665039	-73.4637603759766	5.009	After
b	2011-09-02 10:53:48	9	39.2420997619629	-73.4754486083984	5.076	After
b	2011-09-02 11:39:20	9	39.2425804138184	-73.4755401611328	5.108	After
b	2011-09-02 12:30:38	2	39.24	-73.48	5.143	After
b	2011-09-02 13:06:26	2	39.24	-73.477	5.168	After
b	2011-09-02 16:57:53	9	39.2120208740234	-73.4713821411133	5.329	After
b	2011-09-02 17:50:30	1	39.2	-73.505	5.365	After
b	2011-09-02 21:00:18	9	39.1773681640625	-73.4580001831055	5.497	After
b	2011-09-03 00:47:27	1	39.162	-73.488	5.655	After
b	2011-09-03 04:58:24	9	39.1710891723633	-73.5131378173828	5.829	After
b	2011-09-03 06:10:19	2	39.17	-73.502	5.879	After
b	2011-09-03 09:58:59	9	39.1279411315918	-73.4889068603516	6.038	After
b	2011-09-03 11:13:08	9	39.1139183044434	-73.4934463500977	6.089	After
b	2011-09-03 11:43:28	9	39.107479095459	-73.4977188110352	6.111	After
b	2011-09-03 12:12:23	3	39.104	-73.502	6.131	After
b	2011-09-03 12:50:22	9	39.0957717895508	-73.5073699951172	6.157	After
b	2011-09-03 13:20:24	9	39.0868797302246	-73.5165863037109	6.178	After
b	2011-09-03 13:50:44	9	39.0838317871094	-73.5209426879883	6.199	After
b	2011-09-03 13:55:28	2	39.081	-73.523	6.202	After
b	2011-09-03 20:33:40	9	39.0550308227539	-73.5670776367188	6.479	After
b	2011-09-03 21:05:04	9	39.0526885986328	-73.5707321166992	6.501	After
b	2011-09-04 02:02:28	9	39.0497703552246	-73.6497116088867	6.707	After
b	2011-09-04 06:04:36	1	39.066	-73.633	6.875	After
b	2011-09-04 08:19:47	9	39.0554618835449	-73.6286926269531	6.969	After
b	2011-09-04 11:10:19	1	39.049	-73.677	7.088	After
b	2011-09-04 14:29:36	3	39.013	-73.652	7.226	After
b	2011-09-04 20:57:23	9	38.9847297668457	-73.6529312133789	7.495	After
b	2011-09-05 07:29:07	1	38.949	-73.649	7.934	After
b	2011-09-05 07:49:14	9	38.9531707763672	-73.6645126342773	7.948	After
b	2011-09-05 08:24:24	9	38.9520606994629	-73.6631088256836	7.972	After
b	2011-09-05 10:49:45	9	38.941349029541	-73.6543197631836	8.073	After
b	2011-09-05 11:23:52	9	38.9396095275879	-73.6555709838867	8.097	After
b	2011-09-05 12:31:36	9	38.9312210083008	-73.6582489013672	8.144	After
b	2011-09-05 15:28:00	9	38.9088287353516	-73.6835098266602	8.266	After
b	2011-09-05 16:02:35	9	38.9048690795898	-73.6901931762695	8.29	After
b	2011-09-05 16:42:12	9	38.9013710021973	-73.6991195678711	8.318	After
b	2011-09-05 20:30:20	3	38.903	-73.727	8.476	After
b	2011-09-06 00:30:59	9	38.8889007568359	-73.7414169311523	8.644	After
b	2011-09-06 02:04:44	9	38.8833694458008	-73.7396621704102	8.709	After
b	2011-09-06 08:42:08	1	38.901	-73.722	8.985	After
b	2011-09-06 15:01:36	1	38.884	-73.676	9.248	After
b	2011-09-06 20:04:29	1	38.843	-73.743	9.458	After
b	2011-09-06 21:42:49	1	38.828	-73.784	9.527	After
b	2011-09-07 02:56:38	9	38.8457298278809	-73.8716430664063	9.745	After
b	2011-09-07 03:28:19	9	38.8481407165527	-73.8766937255859	9.767	After
b	2011-09-07 06:52:03	1	38.855	-73.867	9.908	After
b	2011-09-07 07:12:41	2	38.851	-73.872	9.923	After
b	2011-09-07 08:20:45	9	38.8473892211914	-73.8736190795898	9.97	After
b	2011-09-07 09:38:24	9	38.8407592773438	-73.8693084716797	10.024	After
b	2011-09-07 10:08:32	9	38.8375396728516	-73.8668823242188	10.045	After
b	2011-09-07 11:16:27	9	38.8303604125977	-73.8525085449219	10.092	After
b	2011-09-07 13:23:57	2	38.799	-73.845	10.18	After
b	2011-09-07 15:56:48	9	38.7660293579102	-73.880012512207	10.286	After
b	2011-09-07 16:58:16	1	38.762	-73.907	10.329	After
b	2011-09-07 17:59:30	9	38.7563400268555	-73.9019393920898	10.372	After
b	2011-09-07 21:04:24	9	38.7451782226563	-73.9391708374023	10.5	After
b	2011-09-07 22:45:21	9	38.7395401000977	-73.9501113891602	10.57	After
b	2011-09-08 02:30:06	9	38.7085113525391	-73.9583511352539	10.726	After
b	2011-09-08 06:02:32	9	38.6939811706543	-73.9912109375	10.874	After
b	2011-09-08 06:52:00	9	38.6924514770508	-73.9999313354492	10.908	After
b	2011-09-08 08:00:22	9	38.6920318603516	-74.010139465332	10.956	After
b	2011-09-08 09:38:26	1	38.692	-74.005	11.024	After
b	2011-09-08 10:08:21	9	38.6922187805176	-74.0199584960938	11.045	After
b	2011-09-08 11:14:53	9	38.6893615722656	-74.0032272338867	11.091	After
b	2011-09-08 13:17:14	9	38.6841087341309	-73.9775314331055	11.176	After
b	2011-09-08 14:05:29	1	38.692	-73.997	11.209	After
b	2011-09-08 18:03:12	1	38.649	-73.991	11.374	After
b	2011-09-08 19:42:47	1	38.63	-73.988	11.443	After
b	2011-09-08 20:14:24	9	38.6232604980469	-73.9934616088867	11.465	After
b	2011-09-09 10:48:52	3	38.489	-74.189	12.073	After
b	2011-09-09 11:35:40	9	38.4857292175293	-74.200569152832	12.105	After
b	2011-09-09 19:53:10	9	38.3798904418945	-74.3384780883789	12.451	After
b	2011-09-09 20:29:25	9	38.3725318908691	-74.3530578613281	12.476	After
b	2011-09-09 21:01:12	9	38.3664817810059	-74.3664474487305	12.498	After
b	2011-09-09 21:37:27	9	38.3629913330078	-74.3749313354492	12.523	After
b	2011-09-10 09:50:13	9	38.312328338623	-74.5419692993164	13.032	After
b	2011-09-10 14:47:32	9	38.3466987609863	-74.5503311157227	13.238	After
b	2011-09-10 15:46:59	1	38.348	-74.549	13.28	After
b	2011-09-10 22:52:47	9	38.2988586425781	-74.7102127075195	13.575	After
b	2011-09-11 00:44:20	9	38.2910614013672	-74.7271270751953	13.653	After
b	2011-09-11 03:38:32	9	38.2654304504395	-74.7242965698242	13.774	After
b	2011-09-11 04:18:56	9	38.2563896179199	-74.7243728637695	13.802	After
b	2011-09-11 04:49:56	9	38.249698638916	-74.7254486083984	13.823	After
b	2011-09-11 05:19:56	9	38.2435607910156	-74.7273483276367	13.844	After
b	2011-09-11 05:51:00	9	38.2378692626953	-74.7296905517578	13.866	After
b	2011-09-11 08:07:32	9	38.2194709777832	-74.7440032958984	13.961	After
b	2011-09-11 08:42:48	9	38.2177581787109	-74.7492904663086	13.985	After
c	2011-08-14 09:22:40	9	38.3098983764648	-74.2964477539063	-13.957	Before
c	2011-08-14 12:16:30	2	38.316	-74.274	-13.837	Before
c	2011-08-14 12:55:35	2	38.312	-74.278	-13.81	Before
c	2011-08-14 16:26:12	9	38.3168182373047	-74.277473449707	-13.663	Before
c	2011-08-14 16:40:36	1	38.337	-74.287	-13.653	Before
c	2011-08-14 17:26:12	9	38.3193016052246	-74.2688980102539	-13.622	Before
c	2011-08-15 00:03:44	9	38.3288917541504	-74.2755813598633	-13.346	Before
c	2011-08-15 01:16:33	9	38.3282089233398	-74.2831573486328	-13.295	Before
c	2011-08-15 05:59:04	9	38.2982215881348	-74.2889785766602	-13.099	Before
c	2011-08-15 06:05:33	3	38.297	-74.291	-13.094	Before
c	2011-08-15 07:33:03	1	38.292	-74.292	-13.033	Before
c	2011-08-15 11:06:36	9	38.2986793518066	-74.3349227905273	-12.885	Before
c	2011-08-15 12:43:40	2	38.312	-74.318	-12.818	Before
c	2011-08-15 14:42:10	2	38.323	-74.307	-12.735	Before
c	2011-08-15 15:09:12	9	38.3266487121582	-74.304069519043	-12.717	Before
c	2011-08-15 16:24:28	2	38.33	-74.291	-12.664	Before
c	2011-08-15 16:39:12	9	38.326530456543	-74.2815628051758	-12.654	Before
c	2011-08-15 17:09:12	9	38.3241691589355	-74.2763977050781	-12.633	Before
c	2011-08-15 17:39:12	9	38.3211212158203	-74.267951965332	-12.613	Before
c	2011-08-16 00:18:18	1	38.295	-74.29	-12.335	Before
c	2011-08-16 01:13:52	9	38.2827911376953	-74.2985687255859	-12.297	Before
c	2011-08-16 03:33:32	9	38.275821685791	-74.3141021728516	-12.2	Before
c	2011-08-16 07:39:03	2	38.253	-74.328	-12.029	Before
c	2011-08-16 08:50:56	9	38.244499206543	-74.3276672363281	-11.979	Before
c	2011-08-16 09:54:20	9	38.2410011291504	-74.3303375244141	-11.935	Before
c	2011-08-16 11:46:44	9	38.2493896484375	-74.3239517211914	-11.857	Before
c	2011-08-16 12:32:19	9	38.2506103515625	-74.318962097168	-11.826	Before
c	2011-08-16 13:02:20	9	38.2492485046387	-74.3133926391602	-11.805	Before
c	2011-08-16 13:32:20	9	38.2472991943359	-74.3087768554688	-11.784	Before
c	2011-08-16 16:18:24	9	38.2300415039063	-74.2858734130859	-11.669	Before
c	2011-08-16 16:48:24	9	38.2245483398438	-74.2809295654297	-11.648	Before
c	2011-08-16 17:11:05	1	38.215	-74.282	-11.632	Before
c	2011-08-16 17:18:44	9	38.2173881530762	-74.2763595581055	-11.627	Before
c	2011-08-16 17:25:55	3	38.215	-74.277	-11.622	Before
c	2011-08-16 19:55:28	9	38.1796989440918	-74.2737808227539	-11.518	Before
c	2011-08-16 21:50:04	9	38.1755485534668	-74.2871170043945	-11.438	Before
c	2011-08-16 22:33:30	9	38.1728096008301	-74.2997894287109	-11.408	Before
c	2011-08-17 01:23:00	9	38.1769485473633	-74.3536911010742	-11.29	Before
c	2011-08-17 01:59:07	9	38.1781997680664	-74.3580322265625	-11.265	Before
c	2011-08-17 02:09:28	1	38.178	-74.359	-11.258	Before
c	2011-08-17 02:31:44	9	38.1789093017578	-74.3613586425781	-11.243	Before
c	2011-08-17 03:17:29	1	38.179	-74.364	-11.211	Before
c	2011-08-17 05:07:37	9	38.1737289428711	-74.3636169433594	-11.134	Before
c	2011-08-17 05:39:07	9	38.1701393127441	-74.3624114990234	-11.113	Before
c	2011-08-17 05:53:18	1	38.169	-74.375	-11.103	Before
c	2011-08-17 06:15:16	9	38.1643981933594	-74.3618392944336	-11.088	Before
c	2011-08-17 06:50:56	9	38.1588897705078	-74.3628387451172	-11.063	Before
c	2011-08-17 08:21:20	9	38.1450004577637	-74.3659591674805	-11	Before
c	2011-08-17 09:23:17	9	38.136791229248	-74.3693237304688	-10.957	Before
c	2011-08-17 14:56:20	9	38.1478881835938	-74.342643737793	-10.726	Before
c	2011-08-17 15:44:32	9	38.1460990905762	-74.3349914550781	-10.692	Before
c	2011-08-17 16:14:32	9	38.1419296264648	-74.3339920043945	-10.671	Before
c	2011-08-17 18:56:24	2	38.122	-74.369	-10.559	Before
c	2011-08-17 21:04:16	9	38.115779876709	-74.3441696166992	-10.47	Before
c	2011-08-17 22:45:40	9	38.1286582946777	-74.345588684082	-10.4	Before
c	2011-08-17 23:31:50	9	38.1352500915527	-74.3517913818359	-10.368	Before
c	2011-08-18 00:06:16	9	38.1404685974121	-74.3573608398438	-10.344	Before
c	2011-08-18 00:36:47	9	38.1459617614746	-74.3590393066406	-10.323	Before
c	2011-08-18 01:27:00	2	38.148	-74.363	-10.288	Before
c	2011-08-18 01:45:05	2	38.151	-74.358	-10.275	Before
c	2011-08-18 03:55:08	9	38.1569595336914	-74.354621887207	-10.185	Before
c	2011-08-18 06:10:17	9	38.1460418701172	-74.3407211303711	-10.091	Before
c	2011-08-18 06:51:52	9	38.1403388977051	-74.3370590209961	-10.062	Before
c	2011-08-18 07:24:36	9	38.1350784301758	-74.3349227905273	-10.039	Before
c	2011-08-18 08:07:12	9	38.1283912658691	-74.3345336914063	-10.01	Before
c	2011-08-18 08:37:12	9	38.1249885559082	-74.3361282348633	-9.989	Before
c	2011-08-18 09:07:12	9	38.1218681335449	-74.3375930786133	-9.968	Before
c	2011-08-18 12:24:51	1	38.131	-74.353	-9.831	Before
c	2011-08-18 12:54:04	9	38.137939453125	-74.3358535766602	-9.811	Before
c	2011-08-18 13:24:36	9	38.1410903930664	-74.3320388793945	-9.789	Before
c	2011-08-18 15:30:06	9	38.1586799621582	-74.3207168579102	-9.702	Before
c	2011-08-18 16:30:08	9	38.1654205322266	-74.3158187866211	-9.661	Before
c	2011-08-18 17:00:12	9	38.1667900085449	-74.3120422363281	-9.64	Before
c	2011-08-18 19:40:34	9	38.1769218444824	-74.2849578857422	-9.528	Before
c	2011-08-18 20:08:11	2	38.179	-74.314	-9.509	Before
c	2011-08-18 20:40:33	9	38.182258605957	-74.282958984375	-9.487	Before
c	2011-08-18 21:01:18	1	38.176	-74.308	-9.472	Before
c	2011-08-18 21:40:36	9	38.1862907409668	-74.2815170288086	-9.445	Before
c	2011-08-18 22:10:52	9	38.1894912719727	-74.2818603515625	-9.424	Before
c	2011-08-19 01:00:21	2	38.204	-74.31	-9.306	Before
c	2011-08-19 02:02:29	9	38.205940246582	-74.3031463623047	-9.263	Before
c	2011-08-19 02:39:44	9	38.2072296142578	-74.3023376464844	-9.237	Before
c	2011-08-19 03:15:28	9	38.2075881958008	-74.2997436523438	-9.212	Before
c	2011-08-19 05:26:59	1	38.198	-74.291	-9.121	Before
c	2011-08-19 06:35:04	9	38.1966781616211	-74.2852096557617	-9.074	Before
c	2011-08-19 07:06:32	9	38.1917686462402	-74.2828826904297	-9.052	Before
c	2011-08-19 07:39:52	9	38.1872291564941	-74.2807388305664	-9.029	Before
c	2011-08-19 08:13:28	9	38.1828918457031	-74.2799987792969	-9.005	Before
c	2011-08-19 11:02:16	2	38.178	-74.271	-8.888	Before
c	2011-08-19 11:29:37	9	38.1780586242676	-74.2661514282227	-8.869	Before
c	2011-08-19 13:39:23	9	38.1857109069824	-74.2541275024414	-8.779	Before
c	2011-08-19 14:45:24	9	38.190071105957	-74.2490615844727	-8.733	Before
c	2011-08-19 15:15:00	1	38.194	-74.268	-8.713	Before
c	2011-08-19 16:53:54	1	38.196	-74.246	-8.644	Before
c	2011-08-19 17:51:32	9	38.2055397033691	-74.2459030151367	-8.604	Before
c	2011-08-19 18:21:32	9	38.2096710205078	-74.2443008422852	-8.583	Before
c	2011-08-19 20:35:22	1	38.206	-74.255	-8.49	Before
c	2011-08-19 22:42:41	9	38.2284698486328	-74.2481918334961	-8.402	Before
c	2011-08-20 01:05:04	9	38.2348899841309	-74.2644577026367	-8.303	Before
c	2011-08-20 01:35:04	9	38.234920501709	-74.2639236450195	-8.282	Before
c	2011-08-20 02:35:08	9	38.2355499267578	-74.2634735107422	-8.24	Before
c	2011-08-20 05:48:44	9	38.2191505432129	-74.2557601928711	-8.106	Before
c	2011-08-20 06:57:17	9	38.2115783691406	-74.2596435546875	-8.058	Before
c	2011-08-20 08:56:14	1	38.2	-74.261	-7.976	Before
c	2011-08-20 09:07:31	9	38.1974983215332	-74.2659683227539	-7.968	Before
c	2011-08-20 09:41:08	9	38.1940994262695	-74.2674331665039	-7.945	Before
c	2011-08-20 11:38:17	9	38.1929702758789	-74.2563018798828	-7.863	Before
c	2011-08-20 12:20:48	9	38.1951217651367	-74.2571411132813	-7.834	Before
c	2011-08-20 13:00:18	9	38.1954002380371	-74.2547378540039	-7.806	Before
c	2011-08-20 13:15:21	2	38.201	-74.259	-7.796	Before
c	2011-08-20 13:38:04	9	38.1978912353516	-74.2512283325195	-7.78	Before
c	2011-08-20 17:50:29	9	38.2099609375	-74.2373886108398	-7.605	Before
c	2011-08-20 18:22:36	9	38.2091102600098	-74.2362823486328	-7.582	Before
c	2011-08-20 23:16:04	9	38.2089614868164	-74.2431716918945	-7.379	Before
c	2011-08-20 23:48:40	9	38.2113418579102	-74.2448501586914	-7.356	Before
c	2011-08-21 00:34:37	1	38.213	-74.237	-7.324	Before
c	2011-08-21 00:49:33	9	38.2111587524414	-74.2536315917969	-7.314	Before
c	2011-08-21 06:12:28	9	38.228099822998	-74.3232727050781	-7.089	Before
c	2011-08-21 08:08:49	1	38.239	-74.326	-7.009	Before
c	2011-08-21 09:20:54	9	38.2394485473633	-74.3236312866211	-6.959	Before
c	2011-08-21 10:36:48	9	38.2467193603516	-74.3268508911133	-6.906	Before
c	2011-08-21 11:37:28	9	38.2513008117676	-74.3254776000977	-6.864	Before
c	2011-08-21 12:39:16	9	38.2597007751465	-74.3247985839844	-6.821	Before
c	2011-08-21 14:23:12	9	38.2779197692871	-74.3195877075195	-6.749	Before
c	2011-08-21 14:53:12	9	38.2830696105957	-74.3166122436523	-6.728	Before
c	2011-08-21 15:23:16	9	38.2886695861816	-74.3143692016602	-6.707	Before
c	2011-08-21 15:53:36	9	38.2941207885742	-74.3155975341797	-6.686	Before
c	2011-08-21 18:59:56	9	38.3158683776855	-74.2867279052734	-6.556	Before
c	2011-08-21 19:30:00	9	38.3166198730469	-74.2869415283203	-6.536	Before
c	2011-08-21 20:00:00	9	38.3177185058594	-74.2831115722656	-6.515	Before
c	2011-08-21 21:34:44	9	38.3182601928711	-74.2778167724609	-6.449	Before
c	2011-08-22 01:32:04	1	38.337	-74.31	-6.284	Before
c	2011-08-22 02:00:50	9	38.3556289672852	-74.3139877319336	-6.264	Before
c	2011-08-22 04:09:52	9	38.3885612487793	-74.3210067749023	-6.175	Before
c	2011-08-22 04:43:04	9	38.3960418701172	-74.3214111328125	-6.152	Before
c	2011-08-22 06:19:08	9	38.4106712341309	-74.3149871826172	-6.085	Before
c	2011-08-22 07:01:08	9	38.4118690490723	-74.3042526245117	-6.056	Before
c	2011-08-22 07:31:24	9	38.4114303588867	-74.2964782714844	-6.035	Before
c	2011-08-22 08:01:55	2	38.408	-74.285	-6.013	Before
c	2011-08-22 08:16:28	1	38.409	-74.285	-6.003	Before
c	2011-08-22 11:56:32	9	38.3994407653809	-74.2830810546875	-5.851	Before
c	2011-08-22 12:49:52	9	38.3961181640625	-74.2885971069336	-5.813	Before
c	2011-08-22 13:59:20	1	38.393	-74.286	-5.765	Before
c	2011-08-22 16:13:44	9	38.3978881835938	-74.3383407592773	-5.672	Before
c	2011-08-22 18:05:39	1	38.422	-74.318	-5.594	Before
c	2011-08-22 19:32:25	9	38.4200096130371	-74.3907699584961	-5.534	Before
c	2011-08-23 02:59:58	9	38.4351615905762	-74.3820495605469	-5.223	Before
c	2011-08-23 03:43:57	9	38.4295616149902	-74.3860626220703	-5.193	Before
c	2011-08-23 05:55:52	9	38.4168090820313	-74.4132766723633	-5.101	Before
c	2011-08-23 09:19:25	1	38.419	-74.468	-4.96	Before
c	2011-08-23 10:16:00	9	38.4193382263184	-74.471321105957	-4.92	Before
c	2011-08-23 11:04:06	9	38.4225807189941	-74.4626312255859	-4.887	Before
c	2011-08-23 12:41:10	9	38.4310913085938	-74.4470062255859	-4.82	Before
c	2011-08-23 13:29:08	9	38.4340400695801	-74.4372177124023	-4.786	Before
c	2011-08-23 14:25:13	1	38.448	-74.456	-4.747	Before
c	2011-08-23 14:50:07	9	38.4404487609863	-74.429817199707	-4.73	Before
c	2011-08-23 15:19:51	1	38.436	-74.438	-4.709	Before
c	2011-08-23 15:50:16	9	38.4387283325195	-74.4363174438477	-4.688	Before
c	2011-08-23 16:20:20	9	38.4382095336914	-74.4408187866211	-4.667	Before
c	2011-08-23 18:59:56	9	38.4384002685547	-74.4555587768555	-4.556	Before
c	2011-08-23 19:35:42	1	38.46	-74.463	-4.532	Before
c	2011-08-23 22:32:49	1	38.467	-74.41	-4.409	Before
c	2011-08-24 00:56:54	1	38.457	-74.419	-4.309	Before
c	2011-08-24 02:43:53	9	38.4459114074707	-74.4351577758789	-4.234	Before
c	2011-08-24 04:38:24	9	38.43994140625	-74.4470520019531	-4.155	Before
c	2011-08-24 07:04:16	9	38.4506797790527	-74.4648513793945	-4.053	Before
c	2011-08-24 07:45:32	1	38.45	-74.44	-4.025	Before
c	2011-08-24 09:49:24	9	38.4710083007813	-74.4727478027344	-3.939	Before
c	2011-08-24 11:05:36	9	38.4771499633789	-74.4537506103516	-3.886	Before
c	2011-08-24 12:31:50	2	38.489	-74.419	-3.826	Before
c	2011-08-24 12:38:09	9	38.4871482849121	-74.4253387451172	-3.822	Before
c	2011-08-24 13:12:33	9	38.4874382019043	-74.4207382202148	-3.798	Before
c	2011-08-24 13:42:36	9	38.4875602722168	-74.4138717651367	-3.777	Before
c	2011-08-24 15:01:03	3	38.483	-74.399	-3.722	Before
c	2011-08-24 22:02:06	2	38.524	-74.36	-3.43	Before
c	2011-08-24 22:43:28	9	38.5094184875488	-74.3783416748047	-3.401	Before
c	2011-08-25 02:00:04	9	38.505428314209	-74.3654708862305	-3.265	Before
c	2011-08-25 02:18:40	1	38.511	-74.355	-3.252	Before
c	2011-08-25 02:33:20	9	38.5051307678223	-74.362419128418	-3.242	Before
c	2011-08-25 03:52:33	9	38.5066413879395	-74.3547210693359	-3.187	Before
c	2011-08-25 05:15:23	9	38.5131607055664	-74.3482894897461	-3.129	Before
c	2011-08-25 05:57:16	9	38.517749786377	-74.3441162109375	-3.1	Before
c	2011-08-25 07:26:43	1	38.531	-74.344	-3.038	Before
c	2011-08-25 11:09:11	9	38.5511093139648	-74.2682113647461	-2.883	Before
c	2011-08-25 11:48:36	9	38.553150177002	-74.2581100463867	-2.856	Before
c	2011-08-25 12:32:23	9	38.5542793273926	-74.246223449707	-2.826	Before
c	2011-08-25 13:02:24	9	38.5569114685059	-74.2355422973633	-2.805	Before
c	2011-08-25 14:15:32	9	38.5597915649414	-74.2114105224609	-2.754	Before
c	2011-08-25 15:41:36	9	38.5607414245605	-74.1917724609375	-2.694	Before
c	2011-08-25 16:10:06	1	38.579	-74.176	-2.674	Before
c	2011-08-25 16:49:22	9	38.5592918395996	-74.1804504394531	-2.647	Before
c	2011-08-25 17:35:45	2	38.561	-74.167	-2.615	Before
c	2011-08-25 17:50:49	9	38.5591011047363	-74.1734313964844	-2.604	Before
c	2011-08-25 18:20:52	9	38.5608901977539	-74.1713104248047	-2.584	Before
c	2011-08-25 23:37:34	9	38.5975799560547	-74.1659469604492	-2.364	Before
c	2011-08-26 00:38:20	9	38.6064300537109	-74.1611709594727	-2.321	Before
c	2011-08-26 02:02:46	9	38.615650177002	-74.1477127075195	-2.263	Before
c	2011-08-26 04:49:04	9	38.6322402954102	-74.1231384277344	-2.147	Before
c	2011-08-26 06:17:30	9	38.6406707763672	-74.1163330078125	-2.086	Before
c	2011-08-26 07:04:26	9	38.6432609558105	-74.1126937866211	-2.053	Before
c	2011-08-26 07:53:41	9	38.6455497741699	-74.1088714599609	-2.019	Before
c	2011-08-26 08:43:09	9	38.6487197875977	-74.1058502197266	-1.985	Approach
c	2011-08-26 10:28:20	9	38.6516418457031	-74.0924987792969	-1.912	Approach
c	2011-08-26 11:02:10	9	38.6518707275391	-74.0882797241211	-1.888	Approach
c	2011-08-26 13:56:44	9	38.6405792236328	-74.0713424682617	-1.767	Approach
c	2011-08-26 14:36:04	9	38.6374893188477	-74.0712203979492	-1.74	Approach
c	2011-08-26 17:20:24	9	38.6497116088867	-74.0802993774414	-1.626	Approach
c	2011-08-26 23:37:09	2	38.71	-74.09	-1.364	Approach
c	2011-08-27 05:29:39	9	38.7046318054199	-74.0454406738281	-1.119	Approach
c	2011-08-27 06:12:49	9	38.7045516967773	-74.0509414672852	-1.089	Approach
c	2011-08-27 06:53:19	9	38.7055587768555	-74.0571517944336	-1.061	Approach
c	2011-08-27 07:27:58	9	38.7085113525391	-74.0630416870117	-1.037	Approach
c	2011-08-27 08:04:33	9	38.7116317749023	-74.0692977905273	-1.012	Approach
c	2011-08-27 09:25:40	1	38.721	-74.059	-0.955	Approach
c	2011-08-27 10:45:33	9	38.7244606018066	-74.0906372070313	-0.9	Approach
c	2011-08-27 11:58:52	9	38.723690032959	-74.0904006958008	-0.849	Approach
c	2011-08-27 12:53:44	9	38.723690032959	-74.0881195068359	-0.811	Approach
c	2011-08-27 13:23:44	9	38.7263603210449	-74.086067199707	-0.79	Approach
c	2011-08-27 13:56:48	1	38.722	-74.104	-0.767	Approach
c	2011-08-27 14:44:56	9	38.7230110168457	-74.0804824829102	-0.734	Approach
c	2011-08-27 15:45:00	9	38.7222709655762	-74.0776519775391	-0.692	Approach
c	2011-08-27 17:32:48	9	38.724681854248	-74.0802764892578	-0.617	Approach
c	2011-08-27 22:32:17	9	38.7594604492188	-74.1461868286133	-0.409	During
c	2011-08-27 23:04:20	9	38.7664184570313	-74.1553115844727	-0.387	During
c	2011-08-27 23:36:52	2	38.774	-74.166	-0.364	During
c	2011-08-28 00:04:22	9	38.7816314697266	-74.1717910766602	-0.345	During
c	2011-08-28 01:07:48	9	38.7939491271973	-74.1804275512695	-0.301	During
c	2011-08-28 02:24:36	9	38.8070983886719	-74.1898880004883	-0.248	During
c	2011-08-28 04:20:36	9	38.8184585571289	-74.1921691894531	-0.167	During
c	2011-08-28 05:48:50	9	38.8323516845703	-74.1865005493164	-0.106	During
c	2011-08-28 08:21:16	9	38.8628616333008	-74.1801605224609	0	During
c	2011-08-28 10:34:59	9	38.9018211364746	-74.1438980102539	0.093	During
c	2011-08-28 14:07:55	9	38.9071311950684	-74.0969772338867	0.241	During
c	2011-08-28 17:05:19	1	38.902	-74.074	0.364	During
c	2011-08-28 19:03:17	9	38.8925285339355	-74.0557022094727	0.446	During
c	2011-08-28 20:22:39	1	38.876	-74.05	0.501	Departure
c	2011-08-28 23:33:45	9	38.8716506958008	-74.0527114868164	0.634	Departure
c	2011-08-29 00:49:58	1	38.888	-74.007	0.687	Departure
c	2011-08-29 02:29:01	1	38.866	-74.041	0.755	Departure
c	2011-08-29 06:23:07	9	38.8505592346191	-74.0508422851563	0.918	Departure
c	2011-08-29 06:48:06	1	38.854	-74.059	0.935	Departure
c	2011-08-29 08:47:34	9	38.8563003540039	-74.050910949707	1.018	Departure
c	2011-08-29 09:44:14	9	38.8638305664063	-74.0469284057617	1.058	Departure
c	2011-08-29 11:36:10	9	38.8644485473633	-74.0355224609375	1.135	Departure
c	2011-08-29 13:14:57	1	38.862	-74.01	1.204	Departure
c	2011-08-29 18:44:52	9	38.8298988342285	-73.9793395996094	1.433	Departure
c	2011-08-29 20:55:14	9	38.7979011535645	-73.9965515136719	1.524	Departure
c	2011-08-29 23:05:07	2	38.786	-74.04	1.614	Departure
c	2011-08-30 00:31:38	9	38.775951385498	-74.0608520507813	1.674	Departure
c	2011-08-30 00:40:59	2	38.778	-74.06	1.68	Departure
c	2011-08-30 02:57:39	9	38.7646293640137	-74.0772705078125	1.775	Departure
c	2011-08-30 03:31:08	9	38.7619018554688	-74.0807800292969	1.799	Departure
c	2011-08-30 05:31:20	9	38.7449111938477	-74.0874862670898	1.882	Departure
c	2011-08-30 09:08:32	9	38.7041397094727	-74.1114120483398	2.033	After
c	2011-08-30 09:54:30	9	38.6977081298828	-74.11962890625	2.065	After
c	2011-08-30 09:54:57	1	38.698	-74.12	2.065	After
c	2011-08-30 09:55:40	2	38.698	-74.119	2.066	After
c	2011-08-30 11:20:12	9	38.6931915283203	-74.1263122558594	2.124	After
c	2011-08-30 12:47:43	9	38.6888694763184	-74.1283798217773	2.185	After
c	2011-08-30 13:21:04	9	38.6808090209961	-74.1341323852539	2.208	After
c	2011-08-30 14:54:30	9	38.6669387817383	-74.1433410644531	2.273	After
c	2011-08-30 17:59:11	3	38.63	-74.186	2.401	After
c	2011-08-30 18:49:52	9	38.6208305358887	-74.1953201293945	2.437	After
c	2011-08-30 20:06:52	9	38.6101303100586	-74.2247924804688	2.49	After
c	2011-08-30 21:49:29	9	38.5993309020996	-74.263671875	2.561	After
c	2011-08-30 22:53:40	9	38.595890045166	-74.2902069091797	2.606	After
c	2011-08-30 23:23:55	9	38.5951194763184	-74.3016967773438	2.627	After
c	2011-08-31 00:05:40	9	38.5952987670898	-74.3152008056641	2.656	After
c	2011-08-31 01:07:35	9	38.5943298339844	-74.326530456543	2.699	After
c	2011-08-31 04:55:04	9	38.5631904602051	-74.3251800537109	2.857	After
c	2011-08-31 09:05:05	9	38.489818572998	-74.3407363891602	3.03	After
c	2011-08-31 12:00:46	9	38.4688987731934	-74.371696472168	3.152	After
c	2011-08-31 12:47:49	9	38.4672203063965	-74.3727111816406	3.185	After
c	2011-08-31 14:12:35	2	38.461	-74.382	3.244	After
c	2011-08-31 16:38:44	9	38.4496803283691	-74.3997497558594	3.345	After
c	2011-08-31 17:45:54	2	38.436	-74.41	3.392	After
c	2011-08-31 22:20:39	9	38.4091110229492	-74.4169998168945	3.583	After
c	2011-08-31 22:28:57	2	38.408	-74.429	3.589	After
c	2011-08-31 22:59:05	9	38.4041481018066	-74.425178527832	3.61	After
c	2011-08-31 23:29:53	9	38.4022483825684	-74.4320678710938	3.631	After
c	2011-09-01 00:17:16	2	38.404	-74.43	3.664	After
c	2011-09-01 02:01:23	2	38.396	-74.45	3.736	After
c	2011-09-01 02:41:20	9	38.3987503051758	-74.4529037475586	3.764	After
c	2011-09-01 03:24:27	9	38.3953018188477	-74.4534606933594	3.794	After
c	2011-09-01 06:31:43	3	38.365	-74.46	3.924	After
c	2011-09-01 07:19:37	9	38.3544082641602	-74.4593887329102	3.957	After
c	2011-09-01 08:09:26	9	38.3447418212891	-74.4644165039063	3.992	After
c	2011-09-01 08:11:19	2	38.344	-74.467	3.993	After
c	2011-09-01 09:02:49	2	38.336	-74.472	4.029	After
c	2011-09-01 12:39:41	2	38.331	-74.483	4.179	After
c	2011-09-01 13:41:58	9	38.3274116516113	-74.4850463867188	4.223	After
c	2011-09-01 13:52:17	3	38.328	-74.475	4.23	After
c	2011-09-01 14:12:00	9	38.3292503356934	-74.486198425293	4.244	After
c	2011-09-01 14:18:48	2	38.332	-74.491	4.248	After
c	2011-09-01 16:08:16	9	38.3304786682129	-74.4826202392578	4.324	After
c	2011-09-01 18:03:15	2	38.315	-74.5	4.404	After
c	2011-09-01 19:13:33	1	38.313	-74.446	4.453	After
c	2011-09-01 20:25:25	2	38.305	-74.457	4.503	After
c	2011-09-01 23:13:15	3	38.29	-74.474	4.619	After
c	2011-09-02 00:52:53	2	38.287	-74.487	4.689	After
c	2011-09-02 04:40:52	9	38.2714881896973	-74.5199584960938	4.847	After
c	2011-09-02 06:27:47	2	38.263	-74.525	4.921	After
c	2011-09-02 07:39:43	2	38.256	-74.527	4.971	After
c	2011-09-02 07:59:15	2	38.254	-74.522	4.985	After
c	2011-09-02 08:22:08	9	38.2504196166992	-74.5243225097656	5.001	After
c	2011-09-02 08:52:08	9	38.2478103637695	-74.5254821777344	5.021	After
c	2011-09-02 09:21:38	3	38.246	-74.525	5.042	After
c	2011-09-02 14:07:34	3	38.245	-74.515	5.24	After
c	2011-09-02 15:05:04	1	38.247	-74.504	5.28	After
c	2011-09-02 16:21:20	9	38.2396392822266	-74.4898376464844	5.333	After
c	2011-09-02 17:21:51	9	38.2382392883301	-74.4855880737305	5.375	After
c	2011-09-02 17:33:59	2	38.248	-74.47	5.384	After
c	2011-09-02 19:02:53	3	38.221	-74.48	5.446	After
c	2011-09-02 19:31:02	2	38.217	-74.485	5.465	After
c	2011-09-02 20:59:44	9	38.2078399658203	-74.4818420410156	5.527	After
c	2011-09-03 09:57:04	1	38.177	-74.522	6.067	After
c	2011-09-03 11:20:04	9	38.1743087768555	-74.5188522338867	6.124	After
c	2011-09-03 12:20:33	9	38.1748199462891	-74.5139923095703	6.166	After
c	2011-09-03 13:27:06	9	38.1747894287109	-74.5082778930664	6.212	After
c	2011-09-03 14:09:00	9	38.1696510314941	-74.5079803466797	6.241	After
c	2011-09-03 15:55:41	2	38.174	-74.499	6.316	After
c	2011-09-03 19:17:52	9	38.1792182922363	-74.4928436279297	6.456	After
c	2011-09-03 19:52:44	9	38.1829681396484	-74.4873733520508	6.48	After
c	2011-09-03 21:18:21	1	38.188	-74.477	6.54	After
c	2011-09-04 01:45:47	3	38.203	-74.452	6.725	After
c	2011-09-04 03:14:16	9	38.2172088623047	-74.450439453125	6.787	After
c	2011-09-04 04:26:08	9	38.2290115356445	-74.4392318725586	6.837	After
c	2011-09-04 07:09:38	9	38.2360496520996	-74.400146484375	6.95	After
c	2011-09-04 07:18:06	3	38.236	-74.398	6.956	After
c	2011-09-04 07:39:24	3	38.236	-74.392	6.971	After
c	2011-09-04 11:07:27	9	38.2228889465332	-74.3548278808594	7.115	After
c	2011-09-04 12:00:33	1	38.226	-74.385	7.152	After
c	2011-09-04 12:50:59	9	38.2246284484863	-74.3454284667969	7.187	After
c	2011-09-04 14:01:31	9	38.2280502319336	-74.3415298461914	7.236	After
c	2011-09-04 14:03:31	3	38.229	-74.343	7.238	After
c	2011-09-04 15:01:32	9	38.2375297546387	-74.3493576049805	7.278	After
c	2011-09-04 15:55:52	9	38.2429389953613	-74.343620300293	7.316	After
c	2011-09-04 16:10:12	2	38.231	-74.341	7.326	After
c	2011-09-04 16:55:52	9	38.2589912414551	-74.3434524536133	7.357	After
c	2011-09-04 17:44:00	9	38.2640495300293	-74.338020324707	7.391	After
c	2011-09-04 18:44:00	9	38.283878326416	-74.3285980224609	7.432	After
c	2011-09-04 20:13:36	9	38.3019905090332	-74.3067092895508	7.495	After
c	2011-09-04 20:43:36	9	38.3073387145996	-74.2959213256836	7.516	After
c	2011-09-04 21:17:14	9	38.313720703125	-74.2845001220703	7.539	After
c	2011-09-04 22:33:41	1	38.313	-74.261	7.592	After
c	2011-09-05 02:56:48	9	38.3192100524902	-74.2164764404297	7.775	After
c	2011-09-05 03:56:56	9	38.3175086975098	-74.2160263061523	7.816	After
c	2011-09-05 04:57:28	9	38.3173789978027	-74.2162017822266	7.858	After
c	2011-09-05 06:28:20	9	38.3185882568359	-74.2170791625977	7.922	After
c	2011-09-05 06:58:32	9	38.3190689086914	-74.2152862548828	7.943	After
c	2011-09-05 08:18:06	9	38.3269081115723	-74.2172012329102	7.998	After
c	2011-09-05 08:48:08	9	38.3296089172363	-74.2173614501953	8.019	After
c	2011-09-05 10:19:40	9	38.336799621582	-74.2145004272461	8.082	After
c	2011-09-05 13:30:25	2	38.344	-74.204	8.215	After
c	2011-09-05 13:35:18	2	38.344	-74.201	8.218	After
c	2011-09-05 13:47:20	9	38.3415107727051	-74.2028274536133	8.226	After
c	2011-09-05 14:35:32	9	38.347038269043	-74.207763671875	8.26	After
c	2011-09-05 20:18:12	9	38.3672103881836	-74.2203063964844	8.498	After
c	2011-09-06 00:12:45	9	38.341739654541	-74.2301483154297	8.661	After
c	2011-09-06 00:42:47	9	38.3383903503418	-74.2321090698242	8.682	After
c	2011-09-06 00:55:59	1	38.338	-74.227	8.691	After
c	2011-09-06 02:45:21	9	38.331241607666	-74.2402725219727	8.767	After
c	2011-09-06 03:04:05	1	38.329	-74.219	8.78	After
c	2011-09-06 03:30:14	9	38.331958770752	-74.2431335449219	8.798	After
c	2011-09-06 05:22:11	9	38.3376312255859	-74.2524337768555	8.876	After
c	2011-09-06 06:48:52	9	38.3468017578125	-74.2571334838867	8.936	After
c	2011-09-06 08:37:19	1	38.329	-74.215	9.011	After
c	2011-09-06 09:59:40	9	38.3678817749023	-74.2433166503906	9.068	After
c	2011-09-06 10:28:21	1	38.366	-74.232	9.088	After
c	2011-09-06 13:27:01	1	38.37	-74.226	9.212	After
c	2011-09-06 13:49:25	2	38.369	-74.217	9.228	After
c	2011-09-06 15:01:50	1	38.369	-74.22	9.278	After
c	2011-09-06 15:22:09	2	38.372	-74.212	9.292	After
c	2011-09-06 15:31:24	9	38.3666000366211	-74.2172698974609	9.299	After
c	2011-09-06 18:27:21	3	38.362	-74.222	9.421	After
c	2011-09-06 20:18:11	9	38.3540000915527	-74.2389068603516	9.498	After
c	2011-09-06 22:54:44	9	38.3442802429199	-74.2701187133789	9.607	After
c	2011-09-07 00:02:17	9	38.3420791625977	-74.2826614379883	9.653	After
c	2011-09-07 00:32:51	9	38.3413200378418	-74.2865982055664	9.675	After
c	2011-09-07 03:42:04	9	38.3494186401367	-74.296142578125	9.806	After
c	2011-09-07 04:52:56	9	38.3571701049805	-74.2966537475586	9.855	After
c	2011-09-07 06:27:17	9	38.3673515319824	-74.2921676635742	9.921	After
c	2011-09-07 07:52:27	9	38.3722686767578	-74.2851104736328	9.98	After
c	2011-09-07 08:37:15	9	38.3738708496094	-74.2781982421875	10.011	After
c	2011-09-07 09:52:36	9	38.3705787658691	-74.2661285400391	10.063	After
c	2011-09-07 10:28:11	9	38.3673706054688	-74.2587585449219	10.088	After
c	2011-09-07 11:39:02	2	38.36	-74.256	10.137	After
c	2011-09-07 12:54:32	9	38.3503608703613	-74.2393493652344	10.19	After
c	2011-09-07 13:34:36	9	38.3470001220703	-74.2368927001953	10.218	After
c	2011-09-07 14:35:16	1	38.336	-74.244	10.26	After
c	2011-09-07 14:48:03	2	38.345	-74.262	10.269	After
c	2011-09-07 14:59:13	1	38.332	-74.257	10.276	After
c	2011-09-07 15:07:57	1	38.331	-74.255	10.282	After
c	2011-09-07 17:19:08	9	38.3108596801758	-74.2765502929688	10.374	After
c	2011-09-07 17:49:12	9	38.308479309082	-74.285888671875	10.394	After
c	2011-09-07 18:23:08	9	38.3063316345215	-74.2956237792969	10.418	After
c	2011-09-07 22:15:04	9	38.3231315612793	-74.3257217407227	10.579	After
c	2011-09-07 23:17:36	9	38.3269996643066	-74.3187103271484	10.622	After
c	2011-09-08 00:35:20	3	38.327	-74.309	10.676	After
c	2011-09-08 01:21:22	9	38.3240699768066	-74.306770324707	10.708	After
c	2011-09-08 01:58:54	9	38.322021484375	-74.304313659668	10.734	After
c	2011-09-08 02:28:57	9	38.3198394775391	-74.3023300170898	10.755	After
c	2011-09-08 03:27:12	9	38.3159484863281	-74.3001022338867	10.796	After
c	2011-09-08 03:57:38	9	38.3144607543945	-74.2995376586914	10.817	After
c	2011-09-08 04:27:40	9	38.3132781982422	-74.2998580932617	10.838	After
c	2011-09-08 05:26:32	9	38.312068939209	-74.3010787963867	10.879	After
c	2011-09-08 07:56:58	1	38.319	-74.302	10.983	After
c	2011-09-08 09:59:20	1	38.325	-74.31	11.068	After
c	2011-09-08 11:06:27	9	38.3163681030273	-74.3061065673828	11.115	After
c	2011-09-08 11:37:44	9	38.3167114257813	-74.3079376220703	11.136	After
c	2011-09-08 12:15:33	9	38.3166885375977	-74.3085708618164	11.163	After
c	2011-09-08 12:23:56	2	38.32	-74.308	11.169	After
c	2011-09-08 15:11:58	9	38.3148002624512	-74.3156814575195	11.285	After
c	2011-09-08 18:12:48	9	38.2977981567383	-74.33837890625	11.411	After
c	2011-09-08 18:42:48	9	38.2970314025879	-74.3427276611328	11.432	After
c	2011-09-08 19:43:08	9	38.2968902587891	-74.3514404296875	11.474	After
c	2011-09-08 20:13:08	9	38.2970008850098	-74.3563613891602	11.494	After
c	2011-09-08 20:43:28	9	38.2968482971191	-74.3609085083008	11.515	After
c	2011-09-08 20:52:58	1	38.295	-74.372	11.522	After
c	2011-09-08 22:00:32	9	38.3011817932129	-74.3713989257813	11.569	After
c	2011-09-09 00:25:20	9	38.2967681884766	-74.3798599243164	11.669	After
c	2011-09-09 00:59:12	9	38.2929916381836	-74.3811111450195	11.693	After
c	2011-09-09 05:53:41	9	38.2580604553223	-74.421272277832	11.898	After
c	2011-09-09 07:41:26	9	38.2538986206055	-74.4467086791992	11.972	After
c	2011-09-09 08:46:04	9	38.2544593811035	-74.4618606567383	12.017	After
c	2011-09-09 11:33:24	9	38.2666893005371	-74.4930572509766	12.133	After
c	2011-09-09 14:17:00	9	38.2783508300781	-74.5033569335938	12.247	After
c	2011-09-09 16:29:33	9	38.2573013305664	-74.5055389404297	12.339	After
c	2011-09-09 17:08:05	9	38.2484016418457	-74.5063934326172	12.366	After
c	2011-09-09 18:17:07	9	38.2319297790527	-74.5119094848633	12.414	After
c	2011-09-09 18:48:07	9	38.2256698608398	-74.517707824707	12.435	After
c	2011-09-09 21:09:16	9	38.2099990844727	-74.5445938110352	12.533	After
c	2011-09-09 22:03:42	9	38.2045097351074	-74.5521697998047	12.571	After
c	2011-09-10 05:09:48	9	38.1477317810059	-74.5904388427734	12.867	After
c	2011-09-10 09:28:04	9	38.1523094177246	-74.6353607177734	13.046	After
c	2011-09-10 09:58:04	9	38.1543006896973	-74.6383514404297	13.067	After
c	2011-09-10 10:29:25	9	38.156421661377	-74.6380920410156	13.089	After
c	2011-09-10 11:03:08	9	38.1578903198242	-74.6356506347656	13.112	After
c	2011-09-10 12:59:27	9	38.1634902954102	-74.6306915283203	13.193	After
c	2011-09-10 13:29:28	9	38.1632385253906	-74.6300430297852	13.214	After
c	2011-09-10 16:51:24	9	38.1501502990723	-74.6379013061523	13.354	After
c	2011-09-10 17:48:20	3	38.142	-74.645	13.394	After
c	2011-09-10 19:04:00	9	38.1390686035156	-74.6507186889648	13.446	After
c	2011-09-10 21:58:00	9	38.1355018615723	-74.7060089111328	13.567	After
c	2011-09-10 22:28:00	9	38.1360702514648	-74.7147674560547	13.588	After
c	2011-09-10 23:02:15	9	38.1365203857422	-74.7241592407227	13.612	After
c	2011-09-11 00:02:44	9	38.1371688842773	-74.736198425293	13.654	After
c	2011-09-11 00:32:44	9	38.1382789611816	-74.7402801513672	13.675	After
c	2011-09-11 00:37:28	2	38.138	-74.738	13.678	After
c	2011-09-11 03:01:05	2	38.132	-74.75	13.778	After
c	2011-09-11 03:44:27	9	38.1291809082031	-74.7517395019531	13.808	After
c	2011-09-11 04:16:04	9	38.1258316040039	-74.7538223266602	13.83	After
c	2011-09-11 07:19:20	9	38.0964584350586	-74.7728118896484	13.957	After
d	2011-08-14 13:20:31	2	39.014	-74.068	-13.748	Before
d	2011-08-14 13:55:59	1	39.007	-74.081	-13.723	Before
d	2011-08-14 15:05:00	9	39.0179595947266	-74.0760269165039	-13.675	Before
d	2011-08-14 15:38:08	9	39.0204315185547	-74.0716018676758	-13.652	Before
d	2011-08-14 16:09:27	1	39.027	-74.103	-13.63	Before
d	2011-08-14 17:29:43	1	39.013	-74.032	-13.575	Before
d	2011-08-14 21:38:51	9	39.0085906982422	-74.0604476928711	-13.402	Before
d	2011-08-14 23:36:35	9	39.002628326416	-74.0573120117188	-13.32	Before
d	2011-08-15 00:16:23	1	38.994	-74.043	-13.292	Before
d	2011-08-15 00:53:55	9	39.0007286071777	-74.0603713989258	-13.266	Before
d	2011-08-15 05:10:08	9	39.0027084350586	-74.0444564819336	-13.088	Before
d	2011-08-15 06:47:52	9	39.003719329834	-74.0471115112305	-13.02	Before
d	2011-08-15 09:19:40	3	39.01	-74.067	-12.915	Before
d	2011-08-15 10:57:08	1	39.024	-74.088	-12.847	Before
d	2011-08-15 14:42:29	2	39.049	-74.134	-12.691	Before
d	2011-08-15 15:32:56	9	39.0430603027344	-74.1274337768555	-12.656	Before
d	2011-08-15 16:22:28	9	39.0480003356934	-74.119270324707	-12.621	Before
d	2011-08-15 18:59:48	1	39.069	-74.088	-12.512	Before
d	2011-08-15 20:36:59	1	39.061	-74.064	-12.445	Before
d	2011-08-15 22:18:13	2	39.046	-74.093	-12.374	Before
d	2011-08-15 23:05:44	9	39.043628692627	-74.064567565918	-12.341	Before
d	2011-08-15 23:10:18	1	39.045	-74.056	-12.338	Before
d	2011-08-15 23:35:44	9	39.0409507751465	-74.0584564208984	-12.321	Before
d	2011-08-16 00:16:21	9	39.0371017456055	-74.0576171875	-12.292	Before
d	2011-08-16 01:23:38	9	39.0311584472656	-74.0561981201172	-12.246	Before
d	2011-08-16 04:04:24	9	39.0098915100098	-74.0473022460938	-12.134	Before
d	2011-08-16 04:49:48	9	39.0036811828613	-74.0459518432617	-12.102	Before
d	2011-08-16 05:22:11	9	38.9997291564941	-74.045768737793	-12.08	Before
d	2011-08-16 07:01:16	9	38.9868812561035	-74.0439987182617	-12.011	Before
d	2011-08-16 09:02:13	9	38.9732284545898	-74.0465087890625	-11.927	Before
d	2011-08-16 10:46:12	9	38.9668312072754	-74.0549926757813	-11.855	Before
d	2011-08-16 13:04:41	1	38.963	-74.021	-11.759	Before
d	2011-08-16 13:42:58	9	38.9774284362793	-74.0522766113281	-11.732	Before
d	2011-08-16 14:27:28	1	38.964	-74.015	-11.701	Before
d	2011-08-16 15:25:14	9	38.9731216430664	-74.061897277832	-11.661	Before
d	2011-08-16 19:06:55	1	38.97	-74.094	-11.507	Before
d	2011-08-16 20:10:33	9	38.978141784668	-74.0736465454102	-11.463	Before
d	2011-08-17 01:20:08	9	38.9719390869141	-74.1464920043945	-11.248	Before
d	2011-08-17 01:35:27	2	38.974	-74.148	-11.237	Before
d	2011-08-17 02:10:57	2	38.97	-74.153	-11.213	Before
d	2011-08-17 02:37:20	9	38.9728698730469	-74.1575622558594	-11.194	Before
d	2011-08-17 03:37:24	9	38.9736404418945	-74.1583099365234	-11.153	Before
d	2011-08-17 04:07:24	9	38.9743003845215	-74.1570510864258	-11.132	Before
d	2011-08-17 04:37:24	9	38.9740104675293	-74.1568603515625	-11.111	Before
d	2011-08-17 07:05:10	9	38.9693183898926	-74.1475601196289	-11.008	Before
d	2011-08-17 07:24:28	1	38.968	-74.146	-10.995	Before
d	2011-08-17 08:13:53	9	38.968318939209	-74.1457366943359	-10.961	Before
d	2011-08-17 08:47:05	9	38.9674606323242	-74.143928527832	-10.938	Before
d	2011-08-17 11:04:16	9	38.9613494873047	-74.1516876220703	-10.842	Before
d	2011-08-17 13:59:52	2	38.935	-74.177	-10.72	Before
d	2011-08-17 16:23:32	9	38.9460487365723	-74.1763076782227	-10.621	Before
d	2011-08-17 17:23:32	9	38.948600769043	-74.1715087890625	-10.579	Before
d	2011-08-17 19:49:08	3	38.953	-74.147	-10.478	Before
d	2011-08-17 22:53:44	9	38.9651908874512	-74.1427001953125	-10.35	Before
d	2011-08-17 23:25:32	9	38.9673881530762	-74.1424865722656	-10.328	Before
d	2011-08-18 00:03:14	1	38.97	-74.141	-10.301	Before
d	2011-08-18 01:18:14	2	38.975	-74.145	-10.249	Before
d	2011-08-18 01:23:35	2	38.976	-74.143	-10.246	Before
d	2011-08-18 01:37:53	9	38.9788284301758	-74.1375579833984	-10.236	Before
d	2011-08-18 02:13:46	9	38.9820709228516	-74.1349487304688	-10.211	Before
d	2011-08-18 03:01:32	1	38.986	-74.133	-10.178	Before
d	2011-08-18 05:54:41	9	38.9837989807129	-74.088493347168	-10.057	Before
d	2011-08-18 07:06:44	1	38.977	-74.074	-10.007	Before
d	2011-08-18 07:23:26	1	38.972	-74.073	-9.996	Before
d	2011-08-18 08:01:00	1	38.971	-74.068	-9.97	Before
d	2011-08-18 12:02:22	1	38.933	-74.058	-9.802	Before
d	2011-08-18 13:01:56	9	38.9391593933105	-74.0949401855469	-9.761	Before
d	2011-08-18 13:49:29	1	38.924	-74.07	-9.728	Before
d	2011-08-18 14:18:00	9	38.9421882629395	-74.095947265625	-9.708	Before
d	2011-08-18 15:22:26	1	38.948	-74.128	-9.663	Before
d	2011-08-18 16:18:40	9	38.9441719055176	-74.0935211181641	-9.624	Before
d	2011-08-18 17:00:24	1	38.937	-74.058	-9.595	Before
d	2011-08-18 17:27:36	9	38.9483909606934	-74.0874176025391	-9.576	Before
d	2011-08-18 21:31:38	9	38.9239196777344	-74.0920181274414	-9.407	Before
d	2011-08-18 23:29:56	1	38.933	-74.074	-9.325	Before
d	2011-08-19 00:17:22	9	38.9241485595703	-74.1187286376953	-9.292	Before
d	2011-08-19 00:55:12	9	38.9271583557129	-74.1174011230469	-9.265	Before
d	2011-08-19 06:52:14	2	38.929	-74.077	-9.017	Before
d	2011-08-19 07:05:35	3	38.931	-74.075	-9.008	Before
d	2011-08-19 08:47:35	1	38.928	-74.065	-8.937	Before
d	2011-08-19 10:59:00	9	38.9231796264648	-74.0813293457031	-8.846	Before
d	2011-08-19 14:52:40	9	38.9399185180664	-74.1089630126953	-8.684	Before
d	2011-08-19 15:02:04	1	38.934	-74.113	-8.677	Before
d	2011-08-19 16:06:12	9	38.9453582763672	-74.113410949707	-8.633	Before
d	2011-08-19 16:36:09	9	38.9484786987305	-74.1136322021484	-8.612	Before
d	2011-08-19 18:36:52	9	38.9553298950195	-74.1184005737305	-8.528	Before
d	2011-08-19 20:13:36	9	38.9635391235352	-74.1106262207031	-8.461	Before
d	2011-08-19 22:15:36	2	38.974	-74.111	-8.376	Before
d	2011-08-19 22:51:11	9	38.9795913696289	-74.1038284301758	-8.352	Before
d	2011-08-20 03:01:16	9	38.9848289489746	-74.0834197998047	-8.178	Before
d	2011-08-20 05:56:20	9	38.9778289794922	-74.0776596069336	-8.056	Before
d	2011-08-20 06:44:27	3	38.976	-74.076	-8.023	Before
d	2011-08-20 08:16:45	9	38.9728507995605	-74.0752563476563	-7.959	Before
d	2011-08-20 09:17:13	9	38.9721603393555	-74.0775299072266	-7.917	Before
d	2011-08-20 10:34:48	9	38.9698295593262	-74.0842437744141	-7.863	Before
d	2011-08-20 13:14:06	1	38.964	-74.051	-7.752	Before
d	2011-08-20 14:37:50	1	38.998	-74.116	-7.694	Before
d	2011-08-20 14:54:27	1	38.997	-74.115	-7.683	Before
d	2011-08-20 15:27:53	9	38.9992408752441	-74.1301574707031	-7.659	Before
d	2011-08-20 19:51:04	9	38.9884185791016	-74.0879211425781	-7.477	Before
d	2011-08-20 21:27:00	9	38.9807891845703	-74.0679702758789	-7.41	Before
d	2011-08-20 23:02:25	9	38.9797096252441	-74.0648422241211	-7.344	Before
d	2011-08-21 00:17:40	1	38.976	-74.064	-7.291	Before
d	2011-08-21 01:12:59	9	38.9890098571777	-74.0618362426758	-7.253	Before
d	2011-08-21 02:18:44	9	38.9899406433105	-74.0599517822266	-7.207	Before
d	2011-08-21 03:58:56	9	38.9927787780762	-74.0572814941406	-7.138	Before
d	2011-08-21 07:43:54	9	39.0026588439941	-74.0321197509766	-6.982	Before
d	2011-08-21 08:20:35	9	39.0038108825684	-74.0258102416992	-6.956	Before
d	2011-08-21 10:14:43	1	39.003	-73.993	-6.877	Before
d	2011-08-21 12:49:44	9	39.0074501037598	-74.0391235351563	-6.769	Before
d	2011-08-21 13:31:54	9	39.0096588134766	-74.049201965332	-6.74	Before
d	2011-08-21 14:09:51	9	39.0131683349609	-74.0544815063477	-6.714	Before
d	2011-08-21 14:42:45	9	39.0117416381836	-74.0562591552734	-6.691	Before
d	2011-08-21 15:12:48	9	39.0102882385254	-74.0558319091797	-6.67	Before
d	2011-08-21 15:54:10	1	39.015	-74.038	-6.641	Before
d	2011-08-21 19:35:46	2	39.001	-74.077	-6.487	Before
d	2011-08-21 19:51:02	1	39	-74.058	-6.477	Before
d	2011-08-21 21:41:13	9	39.0021781921387	-74.0503768920898	-6.4	Before
d	2011-08-22 01:43:44	9	39.0220413208008	-74.0419235229492	-6.232	Before
d	2011-08-22 06:27:17	9	39.0533409118652	-73.9785690307617	-6.035	Before
d	2011-08-22 08:17:20	9	39.0427894592285	-73.9434585571289	-5.958	Before
d	2011-08-22 08:49:32	9	39.037841796875	-73.9341735839844	-5.936	Before
d	2011-08-22 09:49:29	9	39.026798248291	-73.9217834472656	-5.894	Before
d	2011-08-22 13:36:20	9	38.9874382019043	-73.952751159668	-5.737	Before
d	2011-08-22 14:05:52	1	38.986	-73.983	-5.716	Before
d	2011-08-22 14:52:58	9	38.9806518554688	-73.9752197265625	-5.684	Before
d	2011-08-22 15:33:43	1	38.988	-73.978	-5.655	Before
d	2011-08-22 17:54:12	9	38.9920310974121	-74.0163726806641	-5.558	Before
d	2011-08-22 19:27:16	2	38.994	-74.025	-5.493	Before
d	2011-08-22 19:31:37	1	38.995	-74.031	-5.49	Before
d	2011-08-22 20:02:38	9	38.9961204528809	-74.0357437133789	-5.469	Before
d	2011-08-22 20:33:22	9	38.9987983703613	-74.0313034057617	-5.447	Before
d	2011-08-22 21:35:28	9	39.0015411376953	-74.0346298217773	-5.404	Before
d	2011-08-22 22:40:12	9	39.0076217651367	-74.0386123657227	-5.359	Before
d	2011-08-22 23:10:12	9	39.0122413635254	-74.0372619628906	-5.338	Before
d	2011-08-23 03:25:54	9	39.0148887634277	-74.0212783813477	-5.161	Before
d	2011-08-23 03:55:57	9	39.0123710632324	-74.0195770263672	-5.14	Before
d	2011-08-23 04:28:12	9	39.0094413757324	-74.0180206298828	-5.117	Before
d	2011-08-23 05:08:31	9	39.0058784484863	-74.0185470581055	-5.089	Before
d	2011-08-23 06:23:40	3	39.001	-74.025	-5.037	Before
d	2011-08-23 08:06:06	1	38.993	-74.034	-4.966	Before
d	2011-08-23 08:25:37	9	38.9907188415527	-74.0375366210938	-4.953	Before
d	2011-08-23 11:05:42	2	38.967	-74.07	-4.841	Before
d	2011-08-23 12:51:23	9	38.975269317627	-74.0998611450195	-4.768	Before
d	2011-08-23 14:41:36	9	38.9831581115723	-74.115837097168	-4.692	Before
d	2011-08-23 15:42:22	9	38.9872207641602	-74.1357116699219	-4.649	Before
d	2011-08-23 16:17:25	1	38.99	-74.13	-4.625	Before
d	2011-08-23 16:51:28	9	38.9864311218262	-74.1520309448242	-4.601	Before
d	2011-08-23 17:51:32	9	38.982349395752	-74.1557388305664	-4.56	Before
d	2011-08-23 18:28:52	9	38.982120513916	-74.1512680053711	-4.534	Before
d	2011-08-23 20:15:51	9	38.9718894958496	-74.152717590332	-4.459	Before
d	2011-08-23 20:40:55	1	38.961	-74.138	-4.442	Before
d	2011-08-23 21:30:11	9	38.9602203369141	-74.1544876098633	-4.408	Before
d	2011-08-23 22:20:17	1	38.946	-74.11	-4.373	Before
d	2011-08-24 01:04:14	2	38.934	-74.137	-4.259	Before
d	2011-08-24 01:24:12	9	38.932300567627	-74.1360397338867	-4.245	Before
d	2011-08-24 01:55:32	3	38.932	-74.143	-4.223	Before
d	2011-08-24 07:26:35	9	38.9375114440918	-74.1802215576172	-3.994	Before
d	2011-08-24 08:07:42	9	38.9416885375977	-74.1831207275391	-3.965	Before
d	2011-08-24 11:26:45	9	38.9553909301758	-74.1819076538086	-3.827	Before
d	2011-08-24 15:20:12	9	38.9738311767578	-74.163948059082	-3.665	Before
d	2011-08-24 16:38:07	9	38.9851188659668	-74.1595764160156	-3.611	Before
d	2011-08-24 17:28:46	2	38.993	-74.16	-3.575	Before
d	2011-08-24 19:00:36	9	38.9981117248535	-74.1573104858398	-3.512	Before
d	2011-08-24 19:41:28	9	38.9984588623047	-74.1563873291016	-3.483	Before
d	2011-08-24 21:25:44	9	38.998950958252	-74.1496124267578	-3.411	Before
d	2011-08-24 22:04:42	9	38.9959297180176	-74.148078918457	-3.384	Before
d	2011-08-24 22:34:44	9	38.9940605163574	-74.1456985473633	-3.363	Before
d	2011-08-24 23:06:10	1	39.002	-74.134	-3.341	Before
d	2011-08-25 02:29:11	9	38.993480682373	-74.1451873779297	-3.2	Before
d	2011-08-25 04:12:52	9	39.0025787353516	-74.1431732177734	-3.128	Before
d	2011-08-25 04:42:56	9	39.0067100524902	-74.1419982910156	-3.107	Before
d	2011-08-25 05:45:46	9	39.013240814209	-74.1378173828125	-3.064	Before
d	2011-08-25 08:06:47	9	39.030891418457	-74.1124267578125	-2.966	Before
d	2011-08-25 08:42:00	9	39.0342597961426	-74.1039886474609	-2.941	Before
d	2011-08-25 09:21:08	9	39.036449432373	-74.0933532714844	-2.914	Before
d	2011-08-25 10:12:52	2	39.038	-74.086	-2.878	Before
d	2011-08-25 12:14:05	9	39.0284118652344	-74.0507736206055	-2.794	Before
d	2011-08-25 12:51:49	9	39.0243186950684	-74.04296875	-2.768	Before
d	2011-08-25 13:24:45	9	39.0210990905762	-74.0350875854492	-2.745	Before
d	2011-08-25 17:38:32	1	39.016	-74.011	-2.569	Before
d	2011-08-25 18:58:43	1	39.02	-73.998	-2.513	Before
d	2011-08-25 19:58:12	1	39.007	-74.038	-2.472	Before
d	2011-08-25 21:30:45	1	39.001	-74.039	-2.407	Before
d	2011-08-25 23:21:14	9	39.0216598510742	-74.0414123535156	-2.331	Before
d	2011-08-25 23:48:50	2	39.021	-74.048	-2.311	Before
d	2011-08-26 00:05:04	9	39.0243682861328	-74.0387420654297	-2.3	Before
d	2011-08-26 01:12:30	9	39.0274505615234	-74.0311508178711	-2.253	Before
d	2011-08-26 04:10:00	9	39.0395317077637	-74.0076675415039	-2.13	Before
d	2011-08-26 10:22:04	9	39.0517807006836	-73.9803085327148	-1.872	Approach
d	2011-08-26 11:08:57	9	39.0496788024902	-73.9836502075195	-1.839	Approach
d	2011-08-26 12:03:27	9	39.0493507385254	-73.9847793579102	-1.801	Approach
d	2011-08-26 14:13:16	2	39.064	-74.011	-1.711	Approach
d	2011-08-26 15:35:38	9	39.0495796203613	-73.9861602783203	-1.654	Approach
d	2011-08-26 15:56:40	3	39.05	-73.986	-1.639	Approach
d	2011-08-26 19:03:32	2	39.048	-74.029	-1.51	Approach
d	2011-08-26 21:17:52	9	39.0436706542969	-74.0232620239258	-1.416	Approach
d	2011-08-26 22:29:56	9	39.0407791137695	-74.0312194824219	-1.366	Approach
d	2011-08-26 23:00:06	9	39.0376281738281	-74.0351181030273	-1.345	Approach
d	2011-08-26 23:32:03	1	39.033	-74.03	-1.323	Approach
d	2011-08-26 23:50:36	1	39.032	-74.031	-1.31	Approach
d	2011-08-27 02:04:25	9	39.0331916809082	-74.0304412841797	-1.217	Approach
d	2011-08-27 03:23:57	9	39.0347595214844	-74.0272674560547	-1.162	Approach
d	2011-08-27 07:22:54	9	39.0459899902344	-74.0322036743164	-0.996	Approach
d	2011-08-27 08:05:38	9	39.0482482910156	-74.034553527832	-0.966	Approach
d	2011-08-27 08:41:04	9	39.0501518249512	-74.0380172729492	-0.942	Approach
d	2011-08-27 09:30:34	1	39.051	-74.029	-0.908	Approach
d	2011-08-27 11:05:58	2	39.053	-74.064	-0.841	Approach
d	2011-08-27 12:13:39	1	39.046	-74.061	-0.794	Approach
d	2011-08-27 13:32:06	9	39.035888671875	-74.0648574829102	-0.74	Approach
d	2011-08-27 13:37:46	2	39.038	-74.075	-0.736	Approach
d	2011-08-27 14:48:19	9	39.023078918457	-74.0618591308594	-0.687	Approach
d	2011-08-27 15:17:35	1	39.032	-74.081	-0.667	Approach
d	2011-08-27 17:13:15	1	39.011	-74.078	-0.586	Approach
d	2011-08-27 19:10:56	2	39.003	-74.111	-0.504	Approach
d	2011-08-27 21:05:53	9	39.0058212280273	-74.1392211914063	-0.425	During
d	2011-08-27 21:35:56	9	39.0078392028809	-74.1462631225586	-0.404	During
d	2011-08-28 01:11:49	3	39.014	-74.178	-0.254	During
d	2011-08-28 01:14:10	2	39.014	-74.177	-0.252	During
d	2011-08-28 07:17:22	1	39.029	-74.167	0	During
d	2011-08-28 18:42:48	2	39.063	-74.079	0.476	During
d	2011-08-28 20:27:05	1	39.059	-74.075	0.548	Departure
d	2011-08-28 23:51:45	9	39.0548210144043	-74.0308990478516	0.691	Departure
d	2011-08-29 04:02:52	9	39.0530014038086	-73.9608612060547	0.865	Departure
d	2011-08-29 08:43:56	9	39.1005592346191	-73.916130065918	1.06	Departure
d	2011-08-29 10:37:47	9	39.1382713317871	-73.8950805664063	1.139	Departure
d	2011-08-29 11:07:48	9	39.1480407714844	-73.8861999511719	1.16	Departure
d	2011-08-29 15:26:29	9	39.1955718994141	-73.7781295776367	1.34	Departure
d	2011-08-29 16:13:57	9	39.1957206726074	-73.7586212158203	1.373	Departure
d	2011-08-29 19:35:00	9	39.1891899108887	-73.7088775634766	1.512	Departure
d	2011-08-29 20:25:17	9	39.1903991699219	-73.7114868164063	1.547	Departure
d	2011-08-29 22:57:31	9	39.1983795166016	-73.7212219238281	1.653	Departure
d	2011-08-30 02:45:58	9	39.2137298583984	-73.7100982666016	1.812	Departure
d	2011-08-30 03:40:44	9	39.213508605957	-73.7012405395508	1.85	Departure
d	2011-08-30 04:51:20	9	39.2140998840332	-73.6885375976563	1.899	Departure
d	2011-08-30 05:37:14	9	39.2109184265137	-73.6798324584961	1.93	Departure
d	2011-08-30 08:05:19	9	39.1971397399902	-73.6719818115234	2.033	After
d	2011-08-30 08:58:31	9	39.1945495605469	-73.677116394043	2.07	After
d	2011-08-30 10:16:19	9	39.196891784668	-73.6850128173828	2.124	After
d	2011-08-30 11:09:54	9	39.2089004516602	-73.689208984375	2.161	After
d	2011-08-30 11:26:59	1	39.206	-73.706	2.173	After
d	2011-08-30 13:08:30	9	39.232551574707	-73.6911315917969	2.244	After
d	2011-08-30 14:01:27	9	39.2388687133789	-73.6894378662109	2.281	After
d	2011-08-30 14:51:07	9	39.2426605224609	-73.6871185302734	2.315	After
d	2011-08-30 16:12:28	2	39.246	-73.689	2.372	After
d	2011-08-30 17:43:08	9	39.2505683898926	-73.68701171875	2.435	After
d	2011-08-30 17:56:38	2	39.253	-73.685	2.444	After
d	2011-08-30 18:56:46	9	39.253231048584	-73.696647644043	2.486	After
d	2011-08-30 21:37:12	9	39.2712898254395	-73.7400588989258	2.597	After
d	2011-08-30 22:46:07	2	39.28	-73.76	2.645	After
d	2011-08-30 22:55:56	2	39.28	-73.759	2.652	After
d	2011-08-30 23:14:32	9	39.283618927002	-73.7652282714844	2.665	After
d	2011-08-31 00:21:04	9	39.2924880981445	-73.7742462158203	2.711	After
d	2011-08-31 00:59:31	9	39.29541015625	-73.7763977050781	2.738	After
d	2011-08-31 01:40:10	1	39.284	-73.77	2.766	After
d	2011-08-31 08:55:47	9	39.2464599609375	-73.7652206420898	3.068	After
d	2011-08-31 10:20:20	9	39.242919921875	-73.7884521484375	3.127	After
d	2011-08-31 11:07:13	1	39.255	-73.81	3.16	After
d	2011-08-31 11:14:30	1	39.254	-73.809	3.165	After
d	2011-08-31 12:36:43	9	39.2562789916992	-73.8359680175781	3.222	After
d	2011-08-31 13:40:22	9	39.2633590698242	-73.8505401611328	3.266	After
d	2011-08-31 14:10:30	9	39.2636108398438	-73.8547973632813	3.287	After
d	2011-08-31 14:14:37	3	39.262	-73.853	3.29	After
d	2011-08-31 15:20:09	9	39.2584381103516	-73.862060546875	3.335	After
d	2011-08-31 15:50:16	9	39.2559394836426	-73.8636093139648	3.356	After
d	2011-08-31 17:58:32	9	39.2323417663574	-73.8682632446289	3.445	After
d	2011-08-31 18:59:14	9	39.2192687988281	-73.8765869140625	3.487	After
d	2011-08-31 20:52:19	1	39.197	-73.908	3.566	After
d	2011-08-31 23:21:00	9	39.1916809082031	-73.9487991333008	3.669	After
d	2011-08-31 23:33:46	3	39.189	-73.949	3.678	After
d	2011-09-01 01:15:40	3	39.186	-73.962	3.749	After
d	2011-09-01 01:24:31	2	39.185	-73.963	3.755	After
d	2011-09-01 01:48:08	9	39.1859283447266	-73.9623031616211	3.771	After
d	2011-09-01 02:03:00	1	39.184	-73.968	3.782	After
d	2011-09-01 04:53:12	9	39.1729698181152	-73.9560699462891	3.9	After
d	2011-09-01 07:46:09	9	39.1463890075684	-73.9564819335938	4.02	After
d	2011-09-01 10:41:49	1	39.131	-73.984	4.142	After
d	2011-09-01 12:15:51	9	39.130069732666	-74.0177993774414	4.207	After
d	2011-09-01 12:53:58	9	39.1279907226563	-74.0244064331055	4.234	After
d	2011-09-01 13:59:56	9	39.1232681274414	-74.0337524414063	4.28	After
d	2011-09-01 14:19:24	3	39.124	-74.041	4.293	After
d	2011-09-01 15:09:05	2	39.126	-74.054	4.328	After
d	2011-09-01 18:58:44	9	39.078441619873	-74.0608367919922	4.487	After
d	2011-09-01 20:28:19	2	39.056	-74.06	4.549	After
d	2011-09-01 22:46:37	9	39.0273017883301	-74.0558319091797	4.645	After
d	2011-09-02 00:49:12	9	39.0053215026855	-74.0769271850586	4.73	After
d	2011-09-02 00:53:00	3	39.005	-74.072	4.733	After
d	2011-09-02 01:04:42	2	39.004	-74.082	4.741	After
d	2011-09-02 01:33:49	9	39.0035209655762	-74.08447265625	4.761	After
d	2011-09-02 01:47:30	1	39.006	-74.089	4.771	After
d	2011-09-02 05:32:04	9	39.003101348877	-74.0989685058594	4.927	After
d	2011-09-02 07:40:59	1	38.998	-74.093	5.016	After
d	2011-09-02 10:03:28	9	38.9869995117188	-74.0769500732422	5.115	After
d	2011-09-02 11:49:16	9	38.9740104675293	-74.0820388793945	5.189	After
d	2011-09-02 13:31:47	1	38.969	-74.089	5.26	After
d	2011-09-02 14:36:45	9	38.9694595336914	-74.0920028686523	5.305	After
d	2011-09-02 16:44:02	1	38.973	-74.099	5.394	After
d	2011-09-02 17:34:49	2	38.971	-74.116	5.429	After
d	2011-09-02 18:13:04	9	38.9558715820313	-74.1248626708984	5.455	After
d	2011-09-02 22:52:28	9	38.9505996704102	-74.1547470092773	5.649	After
d	2011-09-03 03:02:10	9	38.9669609069824	-74.1791763305664	5.823	After
d	2011-09-03 03:36:45	9	38.9700088500977	-74.1792221069336	5.847	After
d	2011-09-03 04:20:44	9	38.972339630127	-74.1769104003906	5.877	After
d	2011-09-03 05:16:08	9	38.9738388061523	-74.1712265014648	5.916	After
d	2011-09-03 05:48:19	9	38.9731292724609	-74.1667022705078	5.938	After
d	2011-09-03 06:08:13	1	38.974	-74.171	5.952	After
d	2011-09-03 07:13:04	9	38.9683494567871	-74.1523895263672	5.997	After
d	2011-09-03 07:44:00	9	38.9650382995605	-74.1477432250977	6.018	After
d	2011-09-03 09:15:36	9	38.9525718688965	-74.1357269287109	6.082	After
d	2011-09-03 09:55:34	1	38.954	-74.163	6.11	After
d	2011-09-03 12:51:39	9	38.947078704834	-74.1516571044922	6.232	After
d	2011-09-03 13:21:48	9	38.9457092285156	-74.1561965942383	6.253	After
d	2011-09-03 16:40:04	9	38.9637908935547	-74.1743927001953	6.391	After
d	2011-09-03 17:42:58	1	38.967	-74.175	6.434	After
d	2011-09-03 19:12:07	9	38.9739685058594	-74.1774597167969	6.496	After
d	2011-09-03 20:01:00	9	38.9756889343262	-74.1774597167969	6.53	After
d	2011-09-03 21:14:34	1	38.961	-74.201	6.581	After
d	2011-09-04 06:05:16	2	39.009	-74.096	6.95	After
d	2011-09-04 06:11:22	9	39.0126914978027	-74.1060104370117	6.954	After
d	2011-09-04 07:53:18	1	39.007	-74.09	7.025	After
d	2011-09-04 10:23:29	9	38.9943695068359	-74.0733032226563	7.129	After
d	2011-09-04 12:26:16	2	38.989	-74.083	7.215	After
d	2011-09-04 14:16:09	9	38.9925994873047	-74.1068572998047	7.291	After
d	2011-09-04 14:32:48	2	38.993	-74.106	7.302	After
d	2011-09-04 17:24:50	2	39.017	-74.117	7.422	After
d	2011-09-04 17:31:55	2	39.017	-74.117	7.427	After
d	2011-09-04 18:49:40	2	39.012	-74.121	7.481	After
d	2011-09-04 19:49:57	9	39.0136985778809	-74.1172485351563	7.523	After
d	2011-09-04 20:57:26	1	39.008	-74.121	7.569	After
d	2011-09-04 23:51:27	9	39.0038604736328	-74.077278137207	7.69	After
d	2011-09-05 01:10:43	9	39.0030517578125	-74.0661697387695	7.745	After
d	2011-09-05 01:54:37	9	39.0021896362305	-74.0606307983398	7.776	After
d	2011-09-05 03:01:33	9	39.0022811889648	-74.0550765991211	7.822	After
d	2011-09-05 05:47:10	9	39.0055084228516	-74.0442199707031	7.937	After
d	2011-09-05 06:17:15	9	39.0052604675293	-74.0413818359375	7.958	After
d	2011-09-05 08:52:06	2	39.002	-74.028	8.066	After
d	2011-09-05 09:06:57	3	39	-74.026	8.076	After
d	2011-09-05 10:28:04	9	38.9943695068359	-74.0212326049805	8.132	After
d	2011-09-05 12:12:12	9	38.9910888671875	-74.0405807495117	8.205	After
d	2011-09-05 14:10:09	3	38.996	-74.055	8.287	After
d	2011-09-05 15:25:20	9	39.004150390625	-74.0881423950195	8.339	After
d	2011-09-05 15:43:10	1	38.995	-74.063	8.351	After
d	2011-09-05 18:34:58	2	39.011	-74.115	8.471	After
d	2011-09-05 20:14:11	9	39.0046882629395	-74.1334533691406	8.539	After
d	2011-09-05 20:28:01	2	39.007	-74.13	8.549	After
d	2011-09-05 22:37:12	9	39.004020690918	-74.1286010742188	8.639	After
d	2011-09-06 00:00:20	9	39.0035018920898	-74.1237106323242	8.697	After
d	2011-09-06 01:08:07	9	39.0066986083984	-74.1161422729492	8.744	After
d	2011-09-06 03:10:49	9	39.018138885498	-74.1111221313477	8.829	After
d	2011-09-06 03:47:41	9	39.0232391357422	-74.1100921630859	8.854	After
d	2011-09-06 05:36:14	1	39.042	-74.099	8.93	After
d	2011-09-06 06:05:56	9	39.0473098754883	-74.0982284545898	8.95	After
d	2011-09-06 06:46:47	9	39.0534515380859	-74.0933074951172	8.979	After
d	2011-09-06 11:43:36	1	39.08	-74.041	9.185	After
d	2011-09-06 13:25:08	9	39.077709197998	-74.0561981201172	9.255	After
d	2011-09-06 14:38:48	9	39.0738182067871	-74.0635375976563	9.307	After
d	2011-09-06 15:27:46	2	39.069	-74.068	9.341	After
d	2011-09-06 16:29:49	9	39.067138671875	-74.0788116455078	9.384	After
d	2011-09-06 18:28:42	2	39.062	-74.071	9.466	After
d	2011-09-06 20:10:42	1	39.055	-74.09	9.537	After
d	2011-09-06 20:11:04	1	39.055	-74.09	9.537	After
d	2011-09-06 21:09:46	9	39.0363082885742	-74.0913696289063	9.578	After
d	2011-09-06 21:47:02	1	39.036	-74.091	9.604	After
d	2011-09-06 21:49:17	1	39.036	-74.09	9.605	After
d	2011-09-06 23:00:51	1	39.033	-74.093	9.655	After
d	2011-09-07 00:39:33	1	39.028	-74.097	9.724	After
d	2011-09-07 00:55:10	9	39.0300483703613	-74.0934600830078	9.735	After
d	2011-09-07 01:06:13	1	39.034	-74.094	9.742	After
d	2011-09-07 01:55:31	9	39.0295295715332	-74.0915374755859	9.776	After
d	2011-09-07 02:48:54	9	39.0289001464844	-74.0904083251953	9.814	After
d	2011-09-07 04:41:48	9	39.0269203186035	-74.0910034179688	9.892	After
d	2011-09-07 07:03:27	9	39.0241203308105	-74.0960693359375	9.99	After
d	2011-09-07 08:42:09	9	39.0194091796875	-74.097541809082	10.059	After
d	2011-09-07 09:54:07	9	39.0152816772461	-74.097770690918	10.109	After
d	2011-09-07 12:27:56	9	38.987720489502	-74.0989837646484	10.216	After
d	2011-09-07 13:17:00	9	38.9776000976563	-74.10205078125	10.25	After
d	2011-09-07 14:20:58	9	38.9648704528809	-74.1091918945313	10.294	After
d	2011-09-07 14:30:01	1	38.966	-74.101	10.3	After
d	2011-09-07 15:04:03	2	38.957	-74.106	10.324	After
d	2011-09-07 15:05:05	2	38.957	-74.105	10.325	After
d	2011-09-07 16:24:21	9	38.9461097717285	-74.1330032348633	10.38	After
d	2011-09-07 16:33:05	1	38.937	-74.122	10.386	After
d	2011-09-07 16:34:06	1	38.938	-74.122	10.387	After
d	2011-09-07 16:59:03	2	38.951	-74.14	10.404	After
d	2011-09-07 20:33:17	9	38.9470481872559	-74.1836624145508	10.553	After
d	2011-09-07 21:25:19	1	38.956	-74.164	10.589	After
d	2011-09-07 21:44:20	9	38.9546699523926	-74.1841201782227	10.602	After
d	2011-09-07 22:15:13	9	38.9570083618164	-74.1822280883789	10.624	After
d	2011-09-07 23:20:32	9	38.9597015380859	-74.1897430419922	10.669	After
d	2011-09-08 01:36:05	9	38.9491882324219	-74.1862030029297	10.763	After
d	2011-09-08 09:32:42	1	38.965	-74.249	11.094	After
d	2011-09-08 11:05:35	9	38.962818145752	-74.2668991088867	11.158	After
d	2011-09-08 11:52:08	9	38.9549789428711	-74.2668228149414	11.191	After
d	2011-09-08 15:16:20	9	38.9344215393066	-74.24609375	11.333	After
d	2011-09-08 16:45:10	2	38.93	-74.246	11.394	After
d	2011-09-08 18:25:43	1	38.915	-74.239	11.464	After
d	2011-09-08 19:16:08	9	38.9203910827637	-74.2644805908203	11.499	After
d	2011-09-08 19:46:06	9	38.9182510375977	-74.2682876586914	11.52	After
d	2011-09-08 21:45:42	9	38.9154205322266	-74.2831497192383	11.603	After
d	2011-09-09 00:41:22	9	38.9088897705078	-74.3031311035156	11.725	After
d	2011-09-09 05:53:49	9	38.8745918273926	-74.3396682739258	11.942	After
d	2011-09-09 08:04:53	1	38.873	-74.407	12.033	After
d	2011-09-09 10:20:31	9	38.8530006408691	-74.3912963867188	12.127	After
d	2011-09-09 15:19:34	9	38.8193511962891	-74.3450927734375	12.335	After
d	2011-09-09 17:50:43	2	38.811	-74.329	12.44	After
d	2011-09-09 17:59:04	9	38.8071594238281	-74.3380737304688	12.446	After
d	2011-09-09 18:09:25	2	38.806	-74.333	12.453	After
d	2011-09-09 19:11:04	9	38.7994613647461	-74.3433303833008	12.496	After
d	2011-09-10 00:35:49	9	38.7942085266113	-74.3414611816406	12.721	After
d	2011-09-10 01:09:21	9	38.7936782836914	-74.3387603759766	12.744	After
d	2011-09-10 03:24:21	9	38.7875099182129	-74.3193817138672	12.838	After
d	2011-09-10 03:26:19	1	38.787	-74.32	12.84	After
d	2011-09-10 04:11:16	9	38.7845916748047	-74.3137130737305	12.871	After
d	2011-09-10 04:46:48	9	38.7826690673828	-74.3094024658203	12.895	After
d	2011-09-10 05:33:47	9	38.7800712585449	-74.3051986694336	12.928	After
d	2011-09-10 07:39:42	9	38.7753105163574	-74.2996978759766	13.016	After
d	2011-09-10 08:35:35	9	38.7726707458496	-74.2990188598633	13.054	After
d	2011-09-10 11:11:20	9	38.76708984375	-74.2951736450195	13.162	After
d	2011-09-10 11:56:57	9	38.7710800170898	-74.2926635742188	13.194	After
d	2011-09-10 15:54:17	9	38.7668190002441	-74.3107299804688	13.359	After
d	2011-09-10 17:47:21	3	38.758	-74.322	13.437	After
d	2011-09-10 17:59:49	2	38.752	-74.319	13.446	After
d	2011-09-10 20:10:06	2	38.748	-74.368	13.537	After
d	2011-09-11 02:04:08	9	38.7524681091309	-74.4188995361328	13.782	After
d	2011-09-11 06:25:20	9	38.7192993164063	-74.4007263183594	13.964	After
e	2011-08-14 08:55:39	9	38.4161186218262	-74.0969009399414	-13.914	Before
e	2011-08-14 11:47:40	9	38.4108009338379	-74.1103668212891	-13.795	Before
e	2011-08-14 12:15:59	2	38.414	-74.105	-13.775	Before
e	2011-08-14 12:58:35	9	38.4133605957031	-74.1177673339844	-13.746	Before
e	2011-08-14 13:53:37	1	38.42	-74.141	-13.707	Before
e	2011-08-14 16:43:12	9	38.4281311035156	-74.1391067504883	-13.59	Before
e	2011-08-14 17:26:24	9	38.4326286315918	-74.1391067504883	-13.56	Before
e	2011-08-14 21:04:40	9	38.4324188232422	-74.1488418579102	-13.408	Before
e	2011-08-14 22:35:21	9	38.4296112060547	-74.1601791381836	-13.345	Before
e	2011-08-14 23:14:08	9	38.4283981323242	-74.1648864746094	-13.318	Before
e	2011-08-15 02:16:32	9	38.4086990356445	-74.1544799804688	-13.192	Before
e	2011-08-15 07:10:14	9	38.3691482543945	-74.1631698608398	-12.988	Before
e	2011-08-15 07:46:42	9	38.369571685791	-74.1688995361328	-12.962	Before
e	2011-08-15 08:22:46	9	38.3710403442383	-74.1749114990234	-12.937	Before
e	2011-08-15 22:42:04	9	38.3539810180664	-74.1905136108398	-12.34	Before
e	2011-08-15 23:18:11	9	38.3527603149414	-74.1916580200195	-12.315	Before
e	2011-08-16 04:13:56	9	38.3264694213867	-74.2028579711914	-12.11	Before
e	2011-08-16 04:49:36	9	38.322338104248	-74.2005462646484	-12.085	Before
e	2011-08-16 05:53:53	9	38.3129806518555	-74.1947708129883	-12.041	Before
e	2011-08-16 09:43:04	9	38.2937088012695	-74.1922225952148	-11.881	Before
e	2011-08-16 10:13:07	9	38.2965087890625	-74.1924896240234	-11.861	Before
e	2011-08-16 11:26:22	9	38.2990493774414	-74.1973876953125	-11.81	Before
e	2011-08-17 01:52:18	9	38.406078338623	-74.1981887817383	-11.208	Before
e	2011-08-17 08:25:25	1	38.439	-74.198	-10.935	Before
e	2011-08-17 11:40:59	9	38.4283599853516	-74.1911315917969	-10.8	Before
e	2011-08-17 14:13:53	9	38.4023094177246	-74.2054824829102	-10.693	Before
e	2011-08-17 14:50:20	9	38.3971710205078	-74.2135772705078	-10.668	Before
e	2011-08-17 17:51:08	9	38.3943099975586	-74.2455062866211	-10.543	Before
e	2011-08-17 18:24:49	9	38.3890495300293	-74.2477264404297	-10.519	Before
e	2011-08-17 23:51:17	9	38.3694915771484	-74.2091903686523	-10.292	Before
e	2011-08-18 01:18:44	2	38.375	-74.204	-10.232	Before
e	2011-08-18 02:00:41	9	38.3755912780762	-74.2010879516602	-10.203	Before
e	2011-08-18 04:17:44	9	38.3800811767578	-74.1960906982422	-10.107	Before
e	2011-08-18 07:20:48	9	38.3726196289063	-74.1780700683594	-9.98	Before
e	2011-08-18 09:40:11	9	38.3629684448242	-74.1762466430664	-9.883	Before
e	2011-08-18 12:10:55	9	38.3775596618652	-74.2080078125	-9.779	Before
e	2011-08-18 13:35:19	1	38.396	-74.203	-9.72	Before
e	2011-08-18 17:02:31	9	38.3989906311035	-74.2171325683594	-9.576	Before
e	2011-08-18 17:47:09	9	38.4013290405273	-74.2102966308594	-9.545	Before
e	2011-08-18 18:42:19	1	38.397	-74.202	-9.507	Before
e	2011-08-18 19:26:47	1	38.412	-74.184	-9.476	Before
e	2011-08-18 23:33:38	9	38.3917503356934	-74.1905899047852	-9.305	Before
e	2011-08-19 07:08:23	3	38.399	-74.188	-8.989	Before
e	2011-08-19 09:37:52	9	38.3985595703125	-74.1894302368164	-8.885	Before
e	2011-08-19 10:44:24	9	38.3966789245605	-74.1959915161133	-8.839	Before
e	2011-08-19 13:23:10	9	38.3932800292969	-74.2188186645508	-8.729	Before
e	2011-08-19 13:33:59	1	38.397	-74.217	-8.721	Before
e	2011-08-19 14:31:45	9	38.3915481567383	-74.2297592163086	-8.681	Before
e	2011-08-19 18:20:20	9	38.4152183532715	-74.219841003418	-8.522	Before
e	2011-08-19 19:23:30	9	38.4216117858887	-74.2076721191406	-8.478	Before
e	2011-08-19 19:58:32	1	38.419	-74.223	-8.454	Before
e	2011-08-19 21:46:16	9	38.4233818054199	-74.2048721313477	-8.379	Before
e	2011-08-20 02:11:21	9	38.4041404724121	-74.2163772583008	-8.195	Before
e	2011-08-20 02:46:04	9	38.404109954834	-74.2185287475586	-8.171	Before
e	2011-08-20 03:57:04	9	38.4020690917969	-74.2195205688477	-8.122	Before
e	2011-08-20 05:36:49	9	38.3949012756348	-74.2126312255859	-8.052	Before
e	2011-08-20 06:46:40	9	38.3866882324219	-74.2070236206055	-8.004	Before
e	2011-08-20 06:52:24	2	38.388	-74.213	-8	Before
e	2011-08-20 07:51:15	9	38.3778610229492	-74.206413269043	-7.959	Before
e	2011-08-20 08:21:25	9	38.3757400512695	-74.2074203491211	-7.938	Before
e	2011-08-20 08:58:09	9	38.373291015625	-74.2084121704102	-7.913	Before
e	2011-08-20 10:10:15	9	38.3731689453125	-74.2116622924805	-7.863	Before
e	2011-08-20 12:10:52	9	38.3741111755371	-74.2203063964844	-7.779	Before
e	2011-08-20 16:19:30	9	38.3860015869141	-74.2128677368164	-7.606	Before
e	2011-08-21 00:36:23	9	38.3938484191895	-74.1569671630859	-7.261	Before
e	2011-08-21 02:44:52	9	38.3994102478027	-74.1576080322266	-7.172	Before
e	2011-08-21 04:43:12	9	38.406551361084	-74.1709289550781	-7.09	Before
e	2011-08-21 08:00:50	9	38.4159317016602	-74.1826095581055	-6.952	Before
e	2011-08-21 10:44:17	9	38.4289703369141	-74.1850280761719	-6.839	Before
e	2011-08-21 11:28:38	2	38.432	-74.187	-6.808	Before
e	2011-08-21 14:00:40	9	38.4199714660645	-74.1965484619141	-6.703	Before
e	2011-08-21 14:35:10	1	38.396	-74.184	-6.679	Before
e	2011-08-21 17:23:15	9	38.4155387878418	-74.1988983154297	-6.562	Before
e	2011-08-21 17:53:56	9	38.4175796508789	-74.194580078125	-6.541	Before
e	2011-08-21 18:23:56	9	38.4179992675781	-74.1906585693359	-6.52	Before
e	2011-08-21 19:39:06	9	38.4151802062988	-74.196418762207	-6.468	Before
e	2011-08-21 20:17:05	9	38.4140281677246	-74.1993789672852	-6.441	Before
e	2011-08-21 20:47:30	9	38.4136581420898	-74.2008590698242	-6.42	Before
e	2011-08-21 22:29:18	9	38.4071884155273	-74.2145767211914	-6.349	Before
e	2011-08-22 01:26:38	9	38.4034614562988	-74.2257385253906	-6.226	Before
e	2011-08-22 03:41:08	9	38.4223899841309	-74.2007369995117	-6.133	Before
e	2011-08-22 04:12:52	9	38.4253997802734	-74.1904602050781	-6.111	Before
e	2011-08-22 04:43:08	9	38.428539276123	-74.1807327270508	-6.09	Before
e	2011-08-22 06:21:54	1	38.424	-74.156	-6.021	Before
e	2011-08-22 07:32:07	9	38.4341201782227	-74.1192169189453	-5.972	Before
e	2011-08-22 08:04:43	9	38.4316711425781	-74.1074295043945	-5.95	Before
e	2011-08-22 08:41:17	9	38.4286613464355	-74.0940170288086	-5.924	Before
e	2011-08-22 13:23:36	9	38.4100914001465	-74.0944976806641	-5.728	Before
e	2011-08-22 17:38:19	9	38.4248390197754	-74.1837387084961	-5.551	Before
e	2011-08-23 02:43:45	9	38.3802299499512	-74.1959991455078	-5.173	Before
e	2011-08-23 03:47:18	9	38.3752517700195	-74.1927719116211	-5.129	Before
e	2011-08-23 07:25:43	9	38.3732490539551	-74.211067199707	-4.977	Before
e	2011-08-23 09:17:50	9	38.3736114501953	-74.2229537963867	-4.899	Before
e	2011-08-23 12:46:13	9	38.3706283569336	-74.2587814331055	-4.754	Before
e	2011-08-23 13:41:47	1	38.371	-74.238	-4.716	Before
e	2011-08-23 14:06:06	9	38.3696899414063	-74.265869140625	-4.699	Before
e	2011-08-23 17:46:17	1	38.392	-74.276	-4.546	Before
e	2011-08-23 19:29:56	9	38.4009094238281	-74.2480621337891	-4.474	Before
e	2011-08-23 20:35:32	9	38.3990783691406	-74.2428588867188	-4.428	Before
e	2011-08-23 23:00:17	9	38.4005889892578	-74.253288269043	-4.328	Before
e	2011-08-24 01:08:23	9	38.3918914794922	-74.2425918579102	-4.239	Before
e	2011-08-24 02:56:05	9	38.3885498046875	-74.2502975463867	-4.164	Before
e	2011-08-24 03:33:55	9	38.3885307312012	-74.2562637329102	-4.138	Before
e	2011-08-24 04:07:48	9	38.3915214538574	-74.2621231079102	-4.114	Before
e	2011-08-24 05:13:49	9	38.3989906311035	-74.2777862548828	-4.068	Before
e	2011-08-24 06:19:05	1	38.408	-74.277	-4.023	Before
e	2011-08-24 08:50:22	9	38.4273490905762	-74.3002700805664	-3.918	Before
e	2011-08-24 08:58:54	1	38.427	-74.305	-3.912	Before
e	2011-08-24 09:21:22	1	38.431	-74.306	-3.897	Before
e	2011-08-24 10:27:28	9	38.4283409118652	-74.2836532592773	-3.851	Before
e	2011-08-24 16:04:12	9	38.3878898620605	-74.2571792602539	-3.617	Before
e	2011-08-24 18:49:58	9	38.3725891113281	-74.2605895996094	-3.502	Before
e	2011-08-24 19:06:23	2	38.366	-74.272	-3.49	Before
e	2011-08-24 21:35:36	9	38.3630599975586	-74.2384719848633	-3.387	Before
e	2011-08-24 22:57:47	9	38.3570404052734	-74.2331390380859	-3.33	Before
e	2011-08-25 00:06:29	9	38.3563385009766	-74.2344818115234	-3.282	Before
e	2011-08-25 00:41:51	9	38.3555793762207	-74.2373580932617	-3.257	Before
e	2011-08-25 03:31:52	9	38.3669395446777	-74.2366333007813	-3.139	Before
e	2011-08-25 04:48:08	9	38.3787994384766	-74.2356414794922	-3.086	Before
e	2011-08-25 08:49:24	9	38.4362106323242	-74.2208633422852	-2.919	Before
e	2011-08-25 09:21:49	9	38.4423599243164	-74.2156372070313	-2.896	Before
e	2011-08-25 11:06:28	9	38.4503707885742	-74.208122253418	-2.824	Before
e	2011-08-25 13:11:20	9	38.452579498291	-74.1732406616211	-2.737	Before
e	2011-08-25 14:36:24	1	38.443	-74.188	-2.678	Before
e	2011-08-25 14:48:37	9	38.4460411071777	-74.1723175048828	-2.669	Before
e	2011-08-25 15:33:47	9	38.4482688903809	-74.1746673583984	-2.638	Before
e	2011-08-25 16:16:24	1	38.426	-74.162	-2.608	Before
e	2011-08-25 18:11:55	9	38.4417610168457	-74.1863784790039	-2.528	Before
e	2011-08-25 19:54:39	1	38.439	-74.187	-2.457	Before
e	2011-08-26 03:17:20	9	38.442798614502	-74.1924591064453	-2.149	Before
e	2011-08-26 04:05:04	9	38.4493713378906	-74.1928787231445	-2.116	Before
e	2011-08-26 09:00:17	2	38.471	-74.188	-1.911	Approach
e	2011-08-26 09:28:13	9	38.4712600708008	-74.1842803955078	-1.892	Approach
e	2011-08-26 09:48:59	2	38.473	-74.19	-1.877	Approach
e	2011-08-26 10:04:17	9	38.4703903198242	-74.1801528930664	-1.867	Approach
e	2011-08-26 10:43:32	9	38.4666900634766	-74.1725692749023	-1.839	Approach
e	2011-08-26 11:31:48	9	38.4615097045898	-74.1715698242188	-1.806	Approach
e	2011-08-26 12:43:16	9	38.4519805908203	-74.1673812866211	-1.756	Approach
e	2011-08-26 15:05:56	9	38.4368095397949	-74.1695022583008	-1.657	Approach
e	2011-08-26 17:15:26	2	38.454	-74.199	-1.567	Approach
e	2011-08-26 18:36:08	9	38.4734382629395	-74.202751159668	-1.511	Approach
e	2011-08-26 19:12:08	9	38.4743309020996	-74.1997528076172	-1.486	Approach
e	2011-08-26 20:24:00	1	38.489	-74.192	-1.436	Approach
e	2011-08-27 07:07:01	2	38.474	-74.172	-0.99	Approach
e	2011-08-27 07:27:40	9	38.4759902954102	-74.1727981567383	-0.975	Approach
e	2011-08-27 08:49:13	1	38.476	-74.175	-0.919	Approach
e	2011-08-27 09:13:36	9	38.4892616271973	-74.1855926513672	-0.902	Approach
e	2011-08-27 13:53:37	1	38.483	-74.157	-0.707	Approach
e	2011-08-27 19:54:08	9	38.4977912902832	-74.1715698242188	-0.457	During
e	2011-08-27 20:26:47	9	38.5017395019531	-74.1650085449219	-0.434	During
e	2011-08-27 21:36:28	9	38.5048599243164	-74.1581878662109	-0.386	During
e	2011-08-27 22:14:59	9	38.5052185058594	-74.1553421020508	-0.359	During
e	2011-08-28 01:27:08	9	38.5254516601563	-74.1588363647461	-0.226	During
e	2011-08-28 05:47:24	9	38.5939292907715	-74.154182434082	-0.045	During
e	2011-08-28 06:52:23	9	38.6180686950684	-74.1419372558594	0	During
e	2011-08-28 10:25:37	9	38.6789283752441	-74.0786209106445	0.148	During
e	2011-08-28 16:22:08	9	38.6541595458984	-74.0275726318359	0.396	During
e	2011-08-28 19:50:06	9	38.6133193969727	-74.0131530761719	0.54	Departure
e	2011-08-28 22:30:52	9	38.5731582641602	-74.0369415283203	0.652	Departure
e	2011-08-29 00:57:39	1	38.56	-74.055	0.754	Departure
e	2011-08-29 02:30:27	9	38.5488204956055	-74.076057434082	0.818	Departure
e	2011-08-29 06:19:38	9	38.5216598510742	-74.1110763549805	0.977	Departure
e	2011-08-29 08:23:40	1	38.497	-74.1	1.063	Departure
e	2011-08-29 09:28:53	9	38.504711151123	-74.1224975585938	1.109	Departure
e	2011-08-29 10:03:38	9	38.5035591125488	-74.1183624267578	1.133	Departure
e	2011-08-29 10:40:04	9	38.4985389709473	-74.1178817749023	1.158	Departure
e	2011-08-29 13:14:51	2	38.491	-74.109	1.266	Departure
e	2011-08-29 14:26:58	9	38.4800910949707	-74.1176528930664	1.316	Departure
e	2011-08-29 15:10:41	9	38.4738082885742	-74.1212463378906	1.346	Departure
e	2011-08-29 17:09:07	9	38.4600486755371	-74.1241989135742	1.428	Departure
e	2011-08-29 18:17:26	2	38.445	-74.142	1.476	Departure
e	2011-08-29 23:06:46	1	38.413	-74.201	1.677	Departure
e	2011-08-30 03:17:43	9	38.3614387512207	-74.2804489135742	1.851	Departure
e	2011-08-30 03:56:58	9	38.3487281799316	-74.2821197509766	1.878	Departure
e	2011-08-30 05:01:42	9	38.3269882202148	-74.2757263183594	1.923	Departure
e	2011-08-30 05:41:58	9	38.3100318908691	-74.2703323364258	1.951	Departure
e	2011-08-30 08:32:00	9	38.235221862793	-74.2514114379883	2.069	After
e	2011-08-30 09:53:55	9	38.2064094543457	-74.2415924072266	2.126	After
e	2011-08-30 14:23:32	1	38.233	-74.239	2.313	After
e	2011-08-30 16:13:57	9	38.2578010559082	-74.2432403564453	2.39	After
e	2011-08-30 17:32:04	9	38.2688903808594	-74.2403030395508	2.444	After
e	2011-08-30 19:42:41	2	38.288	-74.242	2.535	After
e	2011-08-30 20:43:34	9	38.3001594543457	-74.2402877807617	2.577	After
e	2011-08-31 03:34:48	1	38.386	-74.21	2.863	After
e	2011-08-31 05:38:25	9	38.3838005065918	-74.2106018066406	2.949	After
e	2011-08-31 06:44:05	9	38.3838806152344	-74.2126235961914	2.994	After
e	2011-08-31 07:27:46	9	38.3819618225098	-74.215446472168	3.025	After
e	2011-08-31 07:57:56	9	38.381290435791	-74.2181930541992	3.046	After
e	2011-08-31 15:50:51	2	38.372	-74.269	3.374	After
e	2011-08-31 16:32:30	2	38.381	-74.251	3.403	After
e	2011-08-31 17:58:00	9	38.3615989685059	-74.2477035522461	3.462	After
e	2011-08-31 19:32:31	1	38.354	-74.228	3.528	After
e	2011-09-01 00:04:40	9	38.3710289001465	-74.2262420654297	3.717	After
e	2011-09-01 01:27:15	2	38.37	-74.224	3.774	After
e	2011-09-01 02:17:25	9	38.3662605285645	-74.2176666259766	3.809	After
e	2011-09-01 05:09:00	9	38.3426208496094	-74.2181930541992	3.928	After
e	2011-09-01 08:01:04	9	38.3105010986328	-74.2342529296875	4.048	After
e	2011-09-01 10:49:42	2	38.3	-74.274	4.165	After
e	2011-09-01 11:10:37	9	38.3052597045898	-74.2907791137695	4.179	After
e	2011-09-01 11:52:34	3	38.309	-74.295	4.208	After
e	2011-09-01 12:20:24	9	38.3078117370605	-74.3038864135742	4.228	After
e	2011-09-01 15:31:23	2	38.365	-74.283	4.36	After
e	2011-09-01 15:51:21	9	38.3651885986328	-74.2721862792969	4.374	After
e	2011-09-01 16:28:46	9	38.3627510070801	-74.2626419067383	4.4	After
e	2011-09-01 17:16:19	9	38.3592681884766	-74.2544479370117	4.433	After
e	2011-09-01 19:38:28	9	38.3540115356445	-74.2423477172852	4.532	After
e	2011-09-01 20:08:37	9	38.3550987243652	-74.239990234375	4.553	After
e	2011-09-01 20:38:40	9	38.3532791137695	-74.2346267700195	4.574	After
e	2011-09-01 22:04:12	1	38.353	-74.252	4.633	After
e	2011-09-01 23:20:40	9	38.3586692810059	-74.2455596923828	4.686	After
e	2011-09-02 00:33:48	9	38.3621406555176	-74.2595977783203	4.737	After
e	2011-09-02 02:26:27	9	38.3620414733887	-74.2853469848633	4.815	After
e	2011-09-02 03:30:32	9	38.3630905151367	-74.2988128662109	4.86	After
e	2011-09-02 05:01:04	9	38.3687400817871	-74.3035583496094	4.923	After
e	2011-09-02 06:12:51	9	38.3747215270996	-74.2991485595703	4.973	After
e	2011-09-02 08:05:05	2	38.384	-74.278	5.05	After
e	2011-09-02 08:21:47	9	38.3884201049805	-74.2766189575195	5.062	After
e	2011-09-02 08:39:45	1	38.386	-74.279	5.075	After
e	2011-09-02 10:27:16	9	38.3939895629883	-74.2457122802734	5.149	After
e	2011-09-02 13:02:35	9	38.3834991455078	-74.2217102050781	5.257	After
e	2011-09-02 13:09:38	1	38.38	-74.213	5.262	After
e	2011-09-02 14:30:10	9	38.3772506713867	-74.2125778198242	5.318	After
e	2011-09-02 19:34:11	9	38.3660583496094	-74.2239837646484	5.529	After
e	2011-09-02 21:40:05	2	38.356	-74.241	5.616	After
e	2011-09-02 21:42:58	9	38.3553581237793	-74.2389831542969	5.618	After
e	2011-09-02 23:12:46	9	38.3559112548828	-74.2443771362305	5.681	After
e	2011-09-03 02:25:15	9	38.3946418762207	-74.2865371704102	5.814	After
e	2011-09-03 03:38:15	9	38.4130516052246	-74.2858963012695	5.865	After
e	2011-09-03 07:48:48	2	38.421	-74.227	6.039	After
e	2011-09-03 11:02:12	9	38.3948783874512	-74.2061233520508	6.173	After
e	2011-09-03 12:13:05	3	38.394	-74.202	6.223	After
e	2011-09-03 12:18:40	9	38.3941307067871	-74.2021331787109	6.227	After
e	2011-09-03 12:45:51	3	38.395	-74.202	6.245	After
e	2011-09-03 12:48:43	9	38.3938484191895	-74.2034378051758	6.247	After
e	2011-09-03 13:09:11	2	38.396	-74.202	6.262	After
e	2011-09-03 14:51:58	1	38.393	-74.215	6.333	After
e	2011-09-03 17:23:59	9	38.4172592163086	-74.2379608154297	6.439	After
e	2011-09-03 17:54:49	9	38.4244689941406	-74.2343826293945	6.46	After
e	2011-09-03 20:28:15	9	38.463249206543	-74.1855010986328	6.567	After
e	2011-09-04 01:46:22	1	38.505	-74.093	6.787	After
e	2011-09-04 06:10:43	9	38.4907302856445	-74.0483016967773	6.971	After
e	2011-09-04 07:47:36	9	38.4809684753418	-74.0425262451172	7.038	After
e	2011-09-04 08:59:43	2	38.469	-74.041	7.088	After
e	2011-09-04 09:22:50	9	38.4670486450195	-74.0433883666992	7.104	After
e	2011-09-04 09:39:13	1	38.465	-74.044	7.116	After
e	2011-09-04 14:28:59	3	38.476	-74.104	7.317	After
e	2011-09-04 15:40:14	9	38.4882698059082	-74.1311187744141	7.367	After
e	2011-09-04 16:50:16	9	38.4930305480957	-74.1449203491211	7.415	After
e	2011-09-04 17:20:16	9	38.4917488098145	-74.1461791992188	7.436	After
e	2011-09-04 18:37:56	9	38.4891700744629	-74.1429977416992	7.49	After
e	2011-09-04 19:27:21	9	38.4852104187012	-74.1417694091797	7.524	After
e	2011-09-04 20:51:55	2	38.48	-74.126	7.583	After
e	2011-09-05 04:58:12	9	38.4105606079102	-74.1546478271484	7.921	After
e	2011-09-05 05:29:41	9	38.4115409851074	-74.1576538085938	7.943	After
e	2011-09-05 10:04:19	9	38.4244499206543	-74.1683120727539	8.133	After
e	2011-09-05 10:49:49	2	38.425	-74.176	8.165	After
e	2011-09-05 11:48:08	2	38.427	-74.165	8.205	After
e	2011-09-05 14:09:35	2	38.427	-74.166	8.304	After
e	2011-09-05 15:31:14	9	38.4454689025879	-74.1593322753906	8.36	After
e	2011-09-05 16:58:16	1	38.448	-74.146	8.421	After
e	2011-09-05 17:59:39	9	38.4413681030273	-74.1514205932617	8.463	After
e	2011-09-05 19:24:07	9	38.4388198852539	-74.1566619873047	8.522	After
e	2011-09-06 10:15:34	9	38.4809684753418	-74.1408920288086	9.141	After
e	2011-09-06 11:38:49	1	38.472	-74.131	9.199	After
e	2011-09-06 12:50:48	9	38.474250793457	-74.1237182617188	9.249	After
e	2011-09-06 17:04:06	3	38.456	-74.161	9.425	After
e	2011-09-06 17:05:32	3	38.456	-74.161	9.426	After
e	2011-09-06 18:43:33	9	38.4310684204102	-74.159049987793	9.494	After
e	2011-09-06 19:35:39	9	38.4224586486816	-74.1500930786133	9.53	After
e	2011-09-06 21:45:02	2	38.427	-74.143	9.62	After
e	2011-09-07 02:33:47	9	38.4300689697266	-74.1959075927734	9.82	After
e	2011-09-07 03:40:00	9	38.4371490478516	-74.1962585449219	9.866	After
e	2011-09-07 04:31:12	9	38.4438705444336	-74.1950302124023	9.902	After
e	2011-09-07 08:26:10	1	38.443	-74.176	10.065	After
e	2011-09-07 09:53:04	9	38.4497299194336	-74.1566619873047	10.125	After
e	2011-09-07 11:31:31	1	38.431	-74.157	10.194	After
e	2011-09-07 14:33:24	9	38.3991088867188	-74.1346969604492	10.32	After
e	2011-09-07 16:12:38	9	38.3827896118164	-74.1337509155273	10.389	After
e	2011-09-07 20:03:43	9	38.4138603210449	-74.1549072265625	10.55	After
e	2011-09-07 22:50:12	9	38.4325408935547	-74.1235427856445	10.665	After
e	2011-09-08 00:43:34	9	38.4260101318359	-74.1033706665039	10.744	After
e	2011-09-08 01:53:38	9	38.4173889160156	-74.0908508300781	10.793	After
e	2011-09-08 02:24:01	1	38.412	-74.08	10.814	After
e	2011-09-08 04:37:32	9	38.3923187255859	-74.0838012695313	10.906	After
e	2011-09-08 05:09:07	9	38.388370513916	-74.0876083374023	10.928	After
e	2011-09-08 09:33:59	2	38.387	-74.129	11.112	After
e	2011-09-08 10:04:43	9	38.3886413574219	-74.1250686645508	11.134	After
e	2011-09-08 13:08:35	9	38.4039916992188	-74.1175308227539	11.261	After
e	2011-09-08 19:20:44	2	38.423	-74.117	11.52	After
e	2011-09-08 19:51:25	9	38.4173889160156	-74.1316375732422	11.541	After
e	2011-09-09 02:29:36	9	38.3436813354492	-74.1693572998047	11.818	After
e	2011-09-09 05:57:51	9	38.3298416137695	-74.2220916748047	11.962	After
e	2011-09-09 08:05:00	9	38.3278694152832	-74.2713165283203	12.05	After
e	2011-09-09 08:41:15	9	38.329231262207	-74.2835311889648	12.076	After
e	2011-09-10 00:21:21	9	38.3530387878418	-74.1017990112305	12.728	After
e	2011-09-10 08:00:33	1	38.342	-74.089	13.047	After
e	2011-09-10 08:37:44	9	38.3429183959961	-74.0882797241211	13.073	After
e	2011-09-10 12:37:31	1	38.363	-74.092	13.24	After
e	2011-09-10 15:18:17	9	38.3812294006348	-74.1259078979492	13.351	After
e	2011-09-10 15:48:40	9	38.3757705688477	-74.1284637451172	13.372	After
e	2011-09-10 16:30:19	1	38.395	-74.12	13.401	After
e	2011-09-10 16:59:06	9	38.3723907470703	-74.1300582885742	13.421	After
e	2011-09-10 17:42:00	9	38.3749504089355	-74.1308822631836	13.451	After
e	2011-09-10 18:16:32	9	38.37744140625	-74.1302185058594	13.475	After
e	2011-09-10 18:57:04	9	38.3807983398438	-74.1306076049805	13.503	After
e	2011-09-10 19:25:37	2	38.38	-74.137	13.523	After
e	2011-09-10 20:58:52	9	38.3738212585449	-74.1369781494141	13.588	After
e	2011-09-10 21:34:39	9	38.37255859375	-74.1361618041992	13.613	After
e	2011-09-10 22:06:18	9	38.3719100952148	-74.1338577270508	13.635	After
e	2011-09-11 00:42:33	9	38.3767700195313	-74.14306640625	13.743	After
e	2011-09-11 06:08:37	9	38.3727684020996	-74.1213684082031	13.97	After
e	2011-09-11 06:25:15	2	38.375	-74.124	13.981	After
f	2011-08-14 08:35:21	9	38.1665496826172	-74.3671493530273	-13.929	Before
f	2011-08-14 09:26:48	1	38.164	-74.377	-13.893	Before
f	2011-08-14 09:36:13	2	38.163	-74.372	-13.887	Before
f	2011-08-14 09:43:33	9	38.1650810241699	-74.3783264160156	-13.882	Before
f	2011-08-14 18:13:38	9	38.2200813293457	-74.2997970581055	-13.528	Before
f	2011-08-15 01:14:56	9	38.2435302734375	-74.2309875488281	-13.235	Before
f	2011-08-15 01:17:12	2	38.245	-74.232	-13.233	Before
f	2011-08-15 02:18:43	3	38.239	-74.227	-13.191	Before
f	2011-08-15 04:00:16	9	38.2269592285156	-74.2140121459961	-13.12	Before
f	2011-08-15 05:13:50	9	38.2180290222168	-74.2140502929688	-13.069	Before
f	2011-08-15 06:42:44	9	38.2051391601563	-74.2191467285156	-13.007	Before
f	2011-08-15 07:13:30	9	38.2035713195801	-74.2212295532227	-12.986	Before
f	2011-08-15 07:40:01	1	38.208	-74.246	-12.968	Before
f	2011-08-15 08:17:33	9	38.2011795043945	-74.2283401489258	-12.941	Before
f	2011-08-15 08:53:08	9	38.2012481689453	-74.230827331543	-12.917	Before
f	2011-08-15 10:17:06	9	38.206859588623	-74.2350769042969	-12.858	Before
f	2011-08-15 11:00:57	1	38.193	-74.23	-12.828	Before
f	2011-08-15 13:19:41	9	38.2306594848633	-74.2592315673828	-12.732	Before
f	2011-08-15 13:51:38	9	38.2336006164551	-74.2631225585938	-12.709	Before
f	2011-08-15 14:55:47	9	38.2349510192871	-74.2653503417969	-12.665	Before
f	2011-08-15 20:37:28	1	38.204	-74.273	-12.428	Before
f	2011-08-16 04:42:28	9	38.1528701782227	-74.3195877075195	-12.091	Before
f	2011-08-16 05:23:09	9	38.146068572998	-74.3228378295898	-12.063	Before
f	2011-08-16 05:53:13	9	38.1406707763672	-74.3247528076172	-12.042	Before
f	2011-08-16 07:10:17	9	38.1305618286133	-74.3329315185547	-11.988	Before
f	2011-08-16 08:04:21	9	38.1265602111816	-74.340950012207	-11.951	Before
f	2011-08-16 10:44:36	9	38.1280212402344	-74.3539810180664	-11.839	Before
f	2011-08-16 13:15:21	1	38.128	-74.388	-11.735	Before
f	2011-08-16 13:44:00	9	38.138069152832	-74.3440017700195	-11.715	Before
f	2011-08-16 14:33:58	9	38.1349906921387	-74.3392181396484	-11.68	Before
f	2011-08-16 22:44:35	9	38.0792808532715	-74.345100402832	-11.339	Before
f	2011-08-16 23:22:10	9	38.0751419067383	-74.3537826538086	-11.313	Before
f	2011-08-17 00:26:09	9	38.070629119873	-74.3679733276367	-11.269	Before
f	2011-08-17 04:51:04	9	38.0574989318848	-74.3961868286133	-11.085	Before
f	2011-08-17 06:04:45	9	38.0486717224121	-74.3949890136719	-11.034	Before
f	2011-08-17 06:42:22	9	38.0436782836914	-74.3968505859375	-11.008	Before
f	2011-08-17 07:13:10	9	38.0403213500977	-74.3982391357422	-10.986	Before
f	2011-08-17 07:27:03	3	38.037	-74.399	-10.977	Before
f	2011-08-17 07:43:19	9	38.0360984802246	-74.4004974365234	-10.965	Before
f	2011-08-17 08:30:56	3	38.03	-74.405	-10.932	Before
f	2011-08-17 08:52:39	3	38.024	-74.402	-10.917	Before
f	2011-08-17 09:08:28	2	38.026	-74.405	-10.906	Before
f	2011-08-17 09:13:40	9	38.0251312255859	-74.4107971191406	-10.903	Before
f	2011-08-17 12:00:56	9	38.0192909240723	-74.4103164672852	-10.786	Before
f	2011-08-17 12:32:00	9	38.0176391601563	-74.4135284423828	-10.765	Before
f	2011-08-17 13:12:04	9	38.016918182373	-74.4128875732422	-10.737	Before
f	2011-08-17 15:34:47	9	38.0095100402832	-74.4238586425781	-10.638	Before
f	2011-08-17 17:05:00	9	38.0034484863281	-74.4321365356445	-10.575	Before
f	2011-08-17 18:43:28	9	37.9973411560059	-74.4427795410156	-10.507	Before
f	2011-08-17 19:49:05	2	38	-74.438	-10.461	Before
f	2011-08-17 20:22:20	9	37.9955902099609	-74.44921875	-10.438	Before
f	2011-08-17 20:52:20	9	37.9962005615234	-74.4532165527344	-10.417	Before
f	2011-08-17 21:22:20	9	37.9991989135742	-74.4523010253906	-10.397	Before
f	2011-08-17 22:39:52	9	38.005931854248	-74.4566879272461	-10.343	Before
f	2011-08-17 23:13:04	9	38.0093116760254	-74.457878112793	-10.32	Before
f	2011-08-18 01:20:56	1	38.017	-74.464	-10.231	Before
f	2011-08-18 01:34:57	9	38.0229415893555	-74.4668579101563	-10.221	Before
f	2011-08-18 01:41:37	2	38.02	-74.464	-10.216	Before
f	2011-08-18 02:05:14	9	38.0250091552734	-74.466796875	-10.2	Before
f	2011-08-18 02:35:58	9	38.0265884399414	-74.46533203125	-10.179	Before
f	2011-08-18 04:24:12	9	38.0260200500488	-74.4544067382813	-10.104	Before
f	2011-08-18 04:54:16	9	38.0242195129395	-74.4512100219727	-10.083	Before
f	2011-08-18 05:24:32	9	38.022029876709	-74.4484100341797	-10.062	Before
f	2011-08-18 06:34:20	9	38.0156402587891	-74.4442596435547	-10.013	Before
f	2011-08-18 07:10:42	9	38.0130310058594	-74.4438171386719	-9.988	Before
f	2011-08-18 07:16:15	2	38.01	-74.439	-9.984	Before
f	2011-08-18 08:03:58	2	38.01	-74.441	-9.951	Before
f	2011-08-18 11:19:34	1	38.019	-74.446	-9.815	Before
f	2011-08-18 12:49:23	9	38.0061302185059	-74.4458923339844	-9.753	Before
f	2011-08-18 13:42:20	1	37.99	-74.449	-9.716	Before
f	2011-08-18 15:19:43	9	38.0236892700195	-74.4479598999023	-9.648	Before
f	2011-08-18 16:24:37	9	38.0322494506836	-74.4495010375977	-9.603	Before
f	2011-08-18 17:01:26	9	38.0378494262695	-74.4474563598633	-9.578	Before
f	2011-08-19 02:36:15	3	38.092	-74.453	-9.179	Before
f	2011-08-19 02:59:22	9	38.0922889709473	-74.4520416259766	-9.162	Before
f	2011-08-19 06:14:47	9	38.0878410339355	-74.4262771606445	-9.027	Before
f	2011-08-19 06:48:56	2	38.084	-74.422	-9.003	Before
f	2011-08-19 07:23:00	9	38.081169128418	-74.4173278808594	-8.979	Before
f	2011-08-19 08:44:35	9	38.0747489929199	-74.4151992797852	-8.923	Before
f	2011-08-19 09:20:28	9	38.0725593566895	-74.4173202514648	-8.898	Before
f	2011-08-19 10:49:12	9	38.0714416503906	-74.4207534790039	-8.836	Before
f	2011-08-19 12:33:56	9	38.0780792236328	-74.4297866821289	-8.763	Before
f	2011-08-19 16:26:34	9	38.1060485839844	-74.4522933959961	-8.602	Before
f	2011-08-19 17:02:12	9	38.1109008789063	-74.4504089355469	-8.577	Before
f	2011-08-19 18:23:11	9	38.1187591552734	-74.4448471069336	-8.521	Before
f	2011-08-19 20:53:08	9	38.1275482177734	-74.4389190673828	-8.417	Before
f	2011-08-19 22:43:47	9	38.1338310241699	-74.4309692382813	-8.34	Before
f	2011-08-20 00:41:28	1	38.145	-74.423	-8.258	Before
f	2011-08-20 01:59:34	9	38.1524696350098	-74.4420776367188	-8.204	Before
f	2011-08-20 02:18:36	2	38.152	-74.435	-8.191	Before
f	2011-08-20 03:03:26	9	38.1575698852539	-74.4412307739258	-8.16	Before
f	2011-08-20 04:03:32	9	38.163330078125	-74.4413070678711	-8.118	Before
f	2011-08-20 04:33:32	9	38.1654815673828	-74.4395904541016	-8.097	Before
f	2011-08-20 05:36:31	9	38.1682281494141	-74.4336624145508	-8.053	Before
f	2011-08-20 06:45:42	1	38.168	-74.43	-8.005	Before
f	2011-08-20 07:03:10	2	38.169	-74.431	-7.993	Before
f	2011-08-20 07:55:31	9	38.1699600219727	-74.4201583862305	-7.957	Before
f	2011-08-20 08:19:30	2	38.172	-74.424	-7.94	Before
f	2011-08-20 14:40:21	1	38.186	-74.388	-7.676	Before
f	2011-08-20 19:07:24	9	38.2114906311035	-74.3598327636719	-7.49	Before
f	2011-08-20 20:22:23	9	38.2087898254395	-74.3487777709961	-7.438	Before
f	2011-08-20 20:53:12	9	38.2043113708496	-74.3507690429688	-7.417	Before
f	2011-08-20 21:24:00	9	38.2036514282227	-74.351676940918	-7.395	Before
f	2011-08-21 00:22:04	9	38.2036781311035	-74.35986328125	-7.272	Before
f	2011-08-21 03:08:49	9	38.2125587463379	-74.365608215332	-7.156	Before
f	2011-08-21 03:41:58	9	38.2152404785156	-74.3662261962891	-7.133	Before
f	2011-08-21 04:26:04	9	38.2196998596191	-74.3665618896484	-7.102	Before
f	2011-08-21 05:57:04	9	38.2277793884277	-74.3648376464844	-7.039	Before
f	2011-08-21 10:45:26	9	38.2436599731445	-74.338249206543	-6.839	Before
f	2011-08-21 14:43:38	9	38.2793006896973	-74.3370971679688	-6.673	Before
f	2011-08-21 15:47:42	9	38.2896995544434	-74.3308868408203	-6.629	Before
f	2011-08-21 17:55:22	2	38.312	-74.315	-6.54	Before
f	2011-08-22 00:59:58	9	38.3435897827148	-74.2904205322266	-6.245	Before
f	2011-08-22 12:29:56	2	38.379	-74.158	-5.766	Before
f	2011-08-22 13:33:43	9	38.3862915039063	-74.1818771362305	-5.722	Before
f	2011-08-22 14:10:07	9	38.3841514587402	-74.1838226318359	-5.697	Before
f	2011-08-22 15:44:52	9	38.3840217590332	-74.2007064819336	-5.631	Before
f	2011-08-22 16:55:42	9	38.3920211791992	-74.2258377075195	-5.582	Before
f	2011-08-22 17:36:19	9	38.3986282348633	-74.2373199462891	-5.553	Before
f	2011-08-23 00:19:59	9	38.431510925293	-74.2163467407227	-5.273	Before
f	2011-08-23 01:31:40	2	38.423	-74.218	-5.223	Before
f	2011-08-23 02:45:50	9	38.4216194152832	-74.2063522338867	-5.172	Before
f	2011-08-23 03:56:36	9	38.4195594787598	-74.2039108276367	-5.123	Before
f	2011-08-23 05:10:27	9	38.4170913696289	-74.2046813964844	-5.071	Before
f	2011-08-23 08:11:28	1	38.411	-74.2	-4.946	Before
f	2011-08-23 11:28:37	9	38.4032897949219	-74.2084426879883	-4.809	Before
f	2011-08-23 12:06:09	9	38.4042701721191	-74.2108383178711	-4.783	Before
f	2011-08-23 13:37:40	1	38.408	-74.198	-4.719	Before
f	2011-08-23 15:19:37	1	38.405	-74.199	-4.648	Before
f	2011-08-23 20:41:44	2	38.434	-74.182	-4.425	Before
f	2011-08-23 21:46:54	9	38.4331283569336	-74.1991500854492	-4.379	Before
f	2011-08-23 22:36:34	9	38.4277687072754	-74.1953277587891	-4.345	Before
f	2011-08-23 23:08:27	9	38.4240798950195	-74.1932907104492	-4.323	Before
f	2011-08-23 23:49:13	9	38.4203910827637	-74.1908569335938	-4.295	Before
f	2011-08-24 01:54:47	2	38.405	-74.191	-4.207	Before
[truncated: 3,574 more rows]
