# Supplementary material for: Riders on the storm: loggerhead sea turtles detect and respond to a major hurricane in the Northwest Atlantic Ocean
Source: Mov Ecol. 2020 Jul 27;8:32. doi: 10.1186/s40462-020-00218-6 (PMC7385951; doi:10.1186/s40462-020-00218-6)
Supplement: Supplementary file 3 — Additional file 3. Location source for tagged turtles and previously observed proportions of tagged turtles in the Mid-Atlantic Bight by month. [file 40462_2020_218_MOESM3_ESM.zip › Croweetal2020_Ridersonthestorm_tempdep.csv]

ID	END_DATE	TEMP_DBAR	TEMP_VALS	TIME2DAY0	phase
b	2011-08-15 16:00:00	2,7,10,13,14,15,19,24,27,51	24.0800,23.6284,22.5476,19.5797,19.4507,17.6280,13.2568,10.0953,9.0146,7.9500	-12.711	Before
b	2011-08-15 20:00:00	2,11,15,18,19,21,22,24,37,52	24.8700,23.4955,19.2727,13.8907,12.8474,11.2246,11.2246,9.9826,8.3100,8.3100	-12.545	Before
b	2011-08-18 00:00:00	2,10,14,15,16,17,18,20,24,48	25.1700,23.2514,18.6231,16.9065,16.1828,14.0117,13.8771,11.3694,9.5181,8.3400	-10.378	Before
b	2011-08-18 04:00:00	2,3,4,5,6,6,6,6,6,6	25.7000,25.6918,25.6759,25.5412,25.3600,25.3600,25.3600,25.3600,25.3600,25.3600	-10.211	Before
b	2011-08-19 04:00:00	2,4,5,6,7,8,9,9,9,9	25.3800,25.3692,25.3657,25.3586,25.3550,25.3461,25.3400,25.3400,25.3400,25.3400	-9.211	Before
b	2011-08-21 04:00:00	2,3,4,5,6,6,6,6,6,6	25.6200,25.5543,25.4448,25.4300,25.4300,25.4300,25.4300,25.4300,25.4300,25.4300	-7.211	Before
b	2011-08-22 20:00:00	2,10,12,14,18,19,21,22,25,50	24.7500,24.1052,23.1058,19.9946,16.3354,14.1269,13.7400,12.0958,10.5805,8.6300	-5.545	Before
b	2011-08-23 04:00:00	2,3,4,5,6,6,6,6,6,6	25.4500,25.4500,25.4487,25.4189,25.3400,25.3400,25.3400,25.3400,25.3400,25.3400	-5.211	Before
b	2011-08-23 20:00:00	2,10,14,18,19,22,24,27,33,50	24.5500,24.1054,22.6762,19.3096,17.0705,15.2602,11.6554,10.2262,9.0988,8.6700	-4.545	Before
b	2011-08-25 00:00:00	2,11,15,16,18,21,23,25,34,46	25.1500,24.6194,21.1708,18.9657,16.5616,14.2238,13.6932,10.9741,8.9513,8.5700	-3.378	Before
b	2011-08-25 12:00:00	2,8,12,15,16,17,18,25,34,50	24.6124,24.8100,23.6406,20.5443,18.4690,18.0902,15.4386,10.3988,8.9165,8.3400	-2.878	Before
b	2011-08-26 20:00:00	2,8,13,17,21,24,25,32,48,51	24.6800,23.9672,22.2014,18.5078,13.6154,12.3518,10.0028,8.5934,8.9174,8.4800	-1.545	Approach
b	2011-08-27 00:00:00	2,3,4,4,4,4,4,4,4,4	25.1400,25.0649,25.0300,25.0300,25.0300,25.0300,25.0300,25.0300,25.0300,25.0300	-1.378	Approach
b	2011-08-27 04:00:00	2,3,4,5,6,7,7,7,7,7	24.9800,24.9612,24.8930,24.8141,24.6167,24.5100,24.5100,24.5100,24.5100,24.5100	-1.211	Approach
b	2011-08-27 08:00:00	2,3,4,5,6,6,6,6,6,6	24.7700,24.7700,24.7580,24.6852,24.6100,24.6100,24.6100,24.6100,24.6100,24.6100	-1.045	Approach
b	2011-08-28 00:00:00	2,13,14,15,16,18,21,25,51,55	24.0700,23.8821,22.0968,21.2982,18.7769,16.4436,10.3675,9.0207,8.4100,8.5823	-0.378	During
b	2011-08-29 16:00:00	2,17,26,30,32,33,34,35,37,47	16.8900,16.7511,15.7616,14.1992,12.1507,10.6230,9.7377,9.2950,8.8176,8.2100	1.289	Departure
b	2011-08-31 08:00:00	2,3,4,5,6,6,6,6,6,6	18.4500,18.2337,17.9124,17.8100,17.8100,17.8100,17.8100,17.8100,17.8100,17.8100	2.955	After
b	2011-08-31 16:00:00	2,18,19,20,26,28,31,34,39,50	18.3700,17.1969,16.9456,16.2473,15.2605,14.5343,11.6854,9.8979,9.3859,9.0600	3.289	After
b	2011-09-02 16:00:00	2,5,7,9,27,31,32,33,37,47	18.9200,18.5614,17.2368,16.8882,15.6730,13.7607,12.5058,12.3165,9.6572,8.9600	5.289	After
b	2011-09-03 16:00:00	2,9,25,27,29,30,31,32,35,57	18.4000,18.1732,16.0564,14.9885,14.7239,12.7583,11.8700,11.7944,9.5737,8.9500	6.289	After
b	2011-09-04 04:00:00	2,3,4,5,7,7,7,7,7,7	19.2300,19.2124,19.0160,18.6800,18.6800,18.6800,18.6800,18.6800,18.6800,18.6800	6.789	After
b	2011-09-04 12:00:00	2,6,8,16,23,27,31,35,37,50	19.5800,19.0532,18.2371,16.8219,16.2537,15.3654,13.5369,10.2933,9.7355,9.2500	7.122	After
b	2011-09-05 16:00:00	2,20,27,28,30,31,32,33,35,49	19.6400,18.0749,15.9309,14.7624,13.6261,13.5403,12.7363,10.8496,9.8848,8.9200	8.289	After
b	2011-09-05 20:00:00	2,3,23,26,27,28,29,32,36,44	20.5600,20.5156,16.8493,15.8049,14.9383,14.8939,13.8051,11.4498,9.7944,9.4500	8.455	After
b	2011-09-06 20:00:00	2,21,28,30,31,33,34,37,38,49	20.6200,18.0014,16.5753,15.3478,15.2543,13.0449,11.3498,10.6251,9.9353,8.9300	9.455	After
b	2011-09-07 12:00:00	2,9,12,24,25,27,30,31,33,45	21.0800,20.5299,19.3266,16.9888,15.9459,15.4073,13.3445,11.4078,10.5139,9.6200	10.122	After
b	2011-09-07 16:00:00	2,10,13,25,28,29,30,32,35,50	21.2100,19.9010,18.7824,16.2596,14.6293,13.6892,11.9161,10.3810,9.8217,9.3100	10.289	After
b	2011-09-10 04:00:00	2,3,4,5,6,7,8,8,8,8	22.2100,22.2100,22.1317,22.0242,21.8995,21.5960,21.3500,21.3500,21.3500,21.3500	12.789	After
b	2011-09-11 00:00:00	2,5,10,14,16,17,23,29,30,34	22.6700,22.0138,21.7075,19.8525,18.4088,17.3500,15.1888,14.4275,14.0163,13.9200	13.622	After
c	2011-08-16 08:00:00	2,11,14,17,19,20,21,22,23,24	25.9300,25.7523,23.9455,21.9757,16.1110,15.1187,12.5121,12.3344,11.3421,11.1200	-12.015	Before
c	2011-08-16 12:00:00	2,13,16,17,19,20,21,23,34,49	25.7700,23.9023,17.1186,16.8543,13.4536,13.2598,11.3216,10.1411,8.6257,8.1500	-11.848	Before
c	2011-08-17 08:00:00	2,3,5,6,6	25.8700,25.8400,25.8400,25.8476,25.8502	-11.015	Before
c	2011-08-17 20:00:00	2,8,13,14,18,19,20,22,30,42	25.1262,25.7400,24.6658,23.5917,13.8902,13.3617,11.7590,10.8894,9.2867,8.6900	-10.515	Before
c	2011-08-18 00:00:00	2,13,15,16,17,20,22,24,28,46	25.9100,24.5892,23.0748,20.7855,19.4119,13.4773,11.4698,10.2195,9.1277,8.3000	-10.348	Before
c	2011-08-18 08:00:00	2,3,4,5,7	25.9000,25.8580,25.8529,25.8500,25.8500	-10.015	Before
c	2011-08-18 12:00:00	2,13,16,17,18,19,20,23,26,45	25.8000,24.0645,19.8047,17.6135,14.3179,13.8270,11.8987,11.0047,9.0238,8.2700	-9.848	Before
c	2011-08-19 00:00:00	2,12,15,17,18,21,22,24,26,45	24.6400,23.4642,21.3280,17.8835,17.6848,13.9754,13.9091,11.0608,9.7029,8.0800	-9.348	Before
c	2011-08-19 08:00:00	2,4,5,6,8,9,10,11,12,13	25.7358,25.7358,25.7468,25.7700,25.7700,25.7445,25.6581,25.5171,25.3466,25.1900	-9.015	Before
c	2011-08-20 04:00:00	2,6,7,8,9,10,11,12,13,13	25.9300,25.9210,25.8938,25.7695,25.6814,25.5661,25.4938,25.3085,24.5559,23.6700	-8.181	Before
c	2011-08-21 20:00:00	2,6,12,13,14,16,19,22,33,51	26.3800,26.0899,23.3885,21.0316,19.9801,15.9190,12.2205,10.5162,8.5219,8.2500	-6.515	Before
c	2011-08-22 12:00:00	2,9,11,15,17,18,19,23,30,50	25.7000,24.2749,22.6609,15.8616,13.5780,12.8225,11.5519,9.5259,8.6502,8.5300	-5.848	Before
c	2011-08-24 16:00:00	2,7,13,14,15,16,18,21,33,47	24.1500,24.0295,22.5536,21.4844,19.4212,16.1080,12.2074,11.0327,9.1954,9.0900	-3.681	Before
c	2011-08-25 12:00:00	2,6,13,16,17,18,19,23,24,48	23.7000,23.5771,21.8261,18.3240,16.3426,15.6206,13.5778,11.1048,9.8453,8.3400	-2.848	Before
c	2011-08-26 12:00:00	2,7,12,13,14,16,18,22,33,50	23.9200,23.8574,22.8721,21.8868,20.1664,15.4431,12.0805,10.1099,8.6397,8.2800	-1.848	Approach
c	2011-08-26 16:00:00	2,9,11,14,16,19,25,36,46,51	23.7000,22.8020,21.9040,17.0641,14.6745,12.7112,10.1999,8.7692,8.8909,8.4800	-1.681	Approach
c	2011-08-27 00:00:00	2,5,15,18,21,22,24,26,36,48	25.2000,23.8147,22.3794,19.5588,13.3501,13.2166,11.1136,10.3292,8.7604,8.5100	-1.348	Approach
c	2011-08-27 04:00:00	2,3,4,5,6,8,8,8,8,8	24.8300,24.4654,24.3659,24.2177,24.1800,24.1800,24.1800,24.1800,24.1800,24.1800	-1.181	Approach
c	2011-08-30 00:00:00	2,13,20,24,25,26,27,28,30,49	19.0300,18.6196,17.4602,15.7673,14.8850,13.5101,11.4581,10.0115,9.0470,8.7700	1.652	Departure
c	2011-08-30 12:00:00	2,10,22,25,26,29,31,38,49,53	18.8700,18.7017,16.4714,15.2301,14.4937,9.9911,9.2547,8.7603,8.8024,8.3500	2.152	After
c	2011-08-31 08:00:00	2,3,4,5,6,7,8,9,9	19.2400,19.2254,19.2234,19.2192,19.1786,18.8422,18.7808,18.7361,18.7200	2.985	After
c	2011-08-31 12:00:00	2,13,23,25,28,31,36,37,45,50	19.2600,18.6073,13.5309,11.7801,9.9878,9.5423,9.5838,9.2212,9.4180,8.9000	3.152	After
c	2011-08-31 16:00:00	2,5,8,16,19,21,24,30,45,50	18.4853,18.6400,18.2532,16.0581,13.7470,11.6196,10.3722,9.4922,9.3858,8.9700	3.319	After
c	2011-08-31 20:00:00	2,10,15,17,20,21,24,25,31,47	18.6000,18.1824,17.6605,16.4363,15.4303,14.6901,9.8123,9.3283,9.1100,9.1100	3.485	After
c	2011-09-01 12:00:00	2,6,8,13,16,19,20,22,25,38	19.0800,18.7402,17.9661,17.3714,16.5218,15.0774,13.8219,13.1894,10.7067,9.6400	4.152	After
c	2011-09-03 12:00:00	2,5,7,9,16,19,22,25,30,45	19.9800,19.7802,18.0120,17.3926,16.9630,15.7043,12.6873,11.2787,10.4895,9.9900	6.152	After
c	2011-09-04 08:00:00	2,3,5,6,6	19.9014,19.9100,19.9100,19.8800,19.8800	6.985	After
c	2011-09-05 12:00:00	2,10,26,29,30,31,32,34,42,57	20.4000,18.5082,16.3345,15.0537,13.5732,13.5262,11.9165,10.0717,8.9672,8.6500	8.152	After
c	2011-09-05 16:00:00	2,9,15,27,28,30,32,34,39,58	20.1300,19.5929,17.8920,15.7771,15.3407,13.6734,10.7752,9.4212,9.0183,8.9400	8.319	After
c	2011-09-06 00:00:00	2,6,14,24,27,30,31,33,44,58	20.1900,19.6137,17.2181,15.8395,14.4722,11.6359,11.3647,9.6358,8.8900,8.9239	8.652	After
c	2011-09-06 16:00:00	2,9,15,26,29,32,34,39,53,59	20.1600,19.8883,17.7149,15.8471,14.3415,11.7153,10.6512,9.1909,9.2815,8.8400	9.319	After
c	2011-09-07 04:00:00	2,3,4,5,6,7,7,7,7,7	21.2100,21.0855,20.8285,20.7973,20.7748,20.7700,20.7700,20.7700,20.7700,20.7700	9.819	After
c	2011-09-07 08:00:00	2,3,4,5,6,7,8,9,11,12	21.2300,21.2234,21.1902,21.1321,21.0208,20.6888,20.5129,20.2788,19.6995,19.5700	9.985	After
c	2011-09-08 08:00:00	2,3,4,5,6,6,6,6,6,6	21.9500,21.9149,21.8808,21.8800,21.8800,21.8800,21.8800,21.8800,21.8800,21.8800	10.985	After
c	2011-09-08 12:00:00	2,5,7,17,23,25,26,27,31,50	21.8300,21.5343,20.3270,17.7644,16.7542,14.8692,12.9842,11.7276,10.2246,9.5100	11.152	After
c	2011-09-09 00:00:00	2,4,5,6,7,8,9,10,11,11	22.4700,22.4347,22.3656,22.2613,22.1922,22.1010,21.5821,21.1147,21.0279,21.0000	11.652	After
c	2011-09-10 08:00:00	2,3,3	22.4500,22.4545,22.4600	12.985	After
c	2011-09-11 00:00:00	2,3,4,5,6,7,8,8,8,8	23.1900,23.1739,23.1133,23.1026,23.1019,23.0200,23.0200,23.0200,23.0200,23.0200	13.652	After
c	2011-09-11 08:00:00	2,3,4,4,4,4,4,4,4,4	22.5600,22.2815,22.2300,22.2300,22.2300,22.2300,22.2300,22.2300,22.2300,22.2300	13.985	After
d	2011-08-14 12:00:00	2,10,13,14,16,20,21,28,29,39	26.1300,25.0515,19.9325,17.0160,14.7375,13.0210,12.0641,11.6539,10.9400,11.2894	-13.804	Before
d	2011-08-15 04:00:00	2,3,4,6,7,8	25.8900,25.8900,25.8800,25.8800,25.8814,25.8857	-13.137	Before
d	2011-08-16 04:00:00	2,3,4,5,6,7,8,8	25.6100,25.6035,25.5492,25.5366,25.5047,25.4653,25.4440,25.4300	-12.137	Before
d	2011-08-16 12:00:00	2,7,9,13,16,17,19,23,31,43	25.3300,25.3300,24.2057,23.5612,19.1541,16.8607,14.4473,12.0938,10.8647,10.3400	-11.804	Before
d	2011-08-16 16:00:00	2,13,14,15,16,18,21,24,30,43	24.6742,24.9100,23.5097,20.6796,19.9868,16.6998,13.6929,11.8356,10.7449,10.1700	-11.637	Before
d	2011-08-17 12:00:00	2,9,10,14,15,17,18,21,22,33	25.1700,24.9136,24.1572,17.7729,17.3242,14.7089,13.7474,13.1448,12.3500,12.3500	-10.804	Before
d	2011-08-18 12:00:00	2,7,13,15,16,17,21,25,26,37	25.3600,25.1194,21.8106,19.3440,16.3360,14.8470,11.7939,11.3728,10.3200,10.7862	-9.804	Before
d	2011-08-19 00:00:00	2,10,12,13,14,16,17,21,26,34	25.3500,25.2905,24.3537,23.0154,20.0414,16.4280,15.0153,12.2793,11.1194,10.4800	-9.304	Before
d	2011-08-19 16:00:00	2,11,12,18,19,20,21,24,31,43	23.9900,23.9900,23.3449,14.9718,14.5014,13.4396,13.3858,11.8134,10.7516,10.5500	-8.637	Before
d	2011-08-20 20:00:00	2,3,13,14,15,17,20,26,28,36	26.5700,24.9002,22.1526,20.9079,17.7504,14.8359,13.2875,12.5740,11.4963,11.3900	-7.47	Before
d	2011-08-23 04:00:00	2,9,12,14,15,19,23,24,35,36	24.7957,24.8500,23.5056,19.4587,15.7921,12.6008,12.1120,11.2700,11.2700,11.7996	-5.137	Before
d	2011-08-23 12:00:00	2,8,11,13,15,16,18,20,25,36	24.2400,23.8435,21.5071,17.5706,14.7386,13.5209,12.2323,11.4110,10.4623,10.0800	-4.804	Before
d	2011-08-25 20:00:00	2,10,11,12,14,16,17,19,21,36	23.8200,23.3214,20.7730,19.4157,15.8840,14.0973,12.1860,10.9949,10.2332,9.9700	-2.47	Before
d	2011-08-27 04:00:00	2,3,3,3,3,3,3,3,3,3	25.0100,24.5500,24.5500,24.5500,24.5500,24.5500,24.5500,24.5500,24.5500,24.5500	-1.137	Approach
d	2011-08-28 08:00:00	2,7,12,14,15,17,18,20,21,32	21.6100,21.3116,21.4774,20.8888,19.2639,19.0069,18.2940,15.4588,13.5438,13.3200	0.03	During
d	2011-08-28 16:00:00	2,16,19,20,26,29,30,31,32,35	19.7000,18.9447,17.9404,17.8408,13.0268,12.5703,11.8150,11.8150,11.4913,11.4000	0.363	During
d	2011-08-29 04:00:00	2,11,15,17,19,20,21,22,23,32	19.0180,19.0500,18.5774,17.3198,14.7086,14.6765,12.9223,12.4177,11.0400,11.0961	0.863	Departure
d	2011-08-30 08:00:00	2,3,4,5,5,5,5,5,5,5	19.1300,18.8264,18.5672,18.5300,18.5300,18.5300,18.5300,18.5300,18.5300,18.5300	2.03	After
d	2011-08-30 12:00:00	2,11,19,20,24,26,27,30,34,40	18.7000,18.2404,17.2589,16.4331,15.1867,13.4106,11.6111,11.1203,10.9100,11.1826	2.196	After
d	2011-08-30 20:00:00	2,10,24,27,28,29,30,31,36,46	18.2600,17.2577,16.3788,15.4150,14.0503,13.3564,11.6371,11.2439,10.5500,10.6040	2.53	After
d	2011-08-31 08:00:00	2,3,3	18.5200,18.3618,18.2800	3.03	After
d	2011-09-01 00:00:00	2,5,10,11,15,16,20,21,23,23	19.7700,18.9211,18.7570,18.2973,18.2973,17.6876,16.9701,15.7413,15.0800,15.0800	3.696	After
d	2011-09-01 08:00:00	2,3,4,5,6	20.1200,19.7181,18.8592,18.8400,18.8400	4.03	After
d	2011-09-01 12:00:00	2,16,18,21,22,23,25,26,30,34	20.0600,18.7536,18.0888,16.0868,14.5099,13.6905,13.5668,13.0257,12.3300,12.6315	4.196	After
d	2011-09-02 04:00:00	2,5,6,8,9,10,11,15,17,17	22.0000,20.9212,20.4916,20.2009,19.9974,19.8973,19.8714,19.5420,18.8960,18.7700	4.863	After
d	2011-09-02 12:00:00	2,4,8,14,17,20,23,26,31,39	21.5500,21.4312,19.5997,19.3324,18.5602,16.9663,13.9369,12.1450,11.6500,11.7193	5.196	After
d	2011-09-03 00:00:00	2,3,6,14,18,21,25,27,28,37	21.0139,21.4800,21.4800,19.6060,17.3241,13.8188,12.4497,12.2555,11.7700,11.8768	5.696	After
d	2011-09-03 12:00:00	2,4,7,17,19,21,22,26,31,38	21.8600,21.3515,19.7862,18.1811,17.4333,15.6786,14.4224,12.3885,11.8900,11.8900	6.196	After
d	2011-09-04 00:00:00	2,8,11,17,19,20,22,25,32,36	22.0900,20.8493,18.9780,18.0220,17.0965,15.3473,13.8320,12.6319,11.9200,11.9912	6.696	After
d	2011-09-04 04:00:00	2,4,5,5	21.7000,21.7000,21.6294,21.5500	6.863	After
d	2011-09-04 20:00:00	2,9,15,19,21,22,23,24,26,39	22.0800,19.4586,19.0887,17.8520,16.6470,15.2729,15.0298,13.6240,12.3767,11.5100	7.53	After
d	2011-09-06 08:00:00	2,3,4,5,6,6	21.7100,21.6657,21.6657,21.6646,21.6603,21.6500	9.03	After
d	2011-09-06 20:00:00	2,11,16,18,19,20,22,24,28,37	20.9500,20.4563,19.3915,18.1331,16.2358,15.1710,13.2738,12.0250,11.2700,11.8314	9.53	After
d	2011-09-07 12:00:00	2,4,8,11,13,14,15,19,20,21	21.1600,21.0812,21.0497,20.9433,20.1395,19.8440,19.4106,18.0829,17.2949,17.2200	10.196	After
d	2011-09-07 16:00:00	2,12,18,19,20,22,25,31,36,39	21.4200,20.4350,18.3753,17.9077,16.3853,14.3157,12.2063,11.4999,11.4700,11.9377	10.363	After
d	2011-09-07 20:00:00	2,3,6,8,12,15,18,19,20,22	21.8700,21.5826,21.2951,21.1450,21.0764,20.1197,19.4633,18.9743,18.2021,17.5800	10.53	After
d	2011-09-08 04:00:00	2,3,3	22.0700,21.9657,21.9200	10.863	After
d	2011-09-08 12:00:00	2,10,17,18,20,22,23,25,27,33	21.8100,20.8011,18.5020,17.6833,17.0713,15.1609,14.3753,13.8956,13.5648,13.5400	11.196	After
d	2011-09-09 00:00:00	2,4,6,13,14,17,19,20,21,22	21.8900,21.7933,21.5716,20.4513,20.1652,18.9320,18.2670,18.1905,17.8600,17.8600	11.696	After
d	2011-09-10 16:00:00	2,9,14,17,18,19,22,24,28,39	22.0800,21.8013,19.6151,19.0054,18.1779,18.0821,15.4865,14.6678,13.9797,13.3700	13.363	After
d	2011-09-10 20:00:00	2,3,4,5,10,11,12,13,14,15	22.9400,22.5238,22.2943,22.2335,22.0558,21.9950,21.7205,21.4910,20.9803,20.6900	13.53	After
e	2011-08-14 12:00:00	2,10,12,13,14,15,16,21,25,61	26.6000,25.9394,20.4711,19.6087,17.1681,17.0947,15.4432,11.1126,9.3143,8.2500	-13.786	Before
e	2011-08-14 16:00:00	2,11,12,13,14,16,20,21,28,59	26.0400,24.1627,21.7188,21.7188,18.3184,16.3703,14.1566,12.2793,9.4280,8.3300	-13.62	Before
e	2011-08-16 08:00:00	2,5,9,10,11,12,13,14,15,15	26.2362,26.2600,26.2123,26.1646,26.0216,25.3243,24.1084,22.4218,20.8602,20.3000	-11.953	Before
e	2011-08-16 12:00:00	2,9,12,14,15,16,20,28,35,60	26.1000,25.8128,23.4075,19.4765,19.4047,17.6456,13.1401,8.9936,8.2756,8.1500	-11.786	Before
e	2011-08-16 20:00:00	2,11,13,14,15,16,17,18,25,57	25.7000,24.4575,21.3600,18.7525,18.1400,16.3550,16.1450,13.9575,8.8825,8.2000	-11.453	Before
e	2011-08-17 00:00:00	2,9,12,15,16,17,21,22,26,52	26.0100,25.7993,23.8677,17.8095,17.5285,15.0526,12.3659,10.8557,9.1348,8.4500	-11.286	Before
e	2011-08-17 04:00:00	2,3,4,5,5,5,5,5,5,5	26.0000,26.0180,26.0413,26.0500,26.0500,26.0500,26.0500,26.0500,26.0500,26.0500	-11.12	Before
e	2011-08-17 20:00:00	2,9,12,13,14,15,18,20,25,53	25.9300,25.3007,22.0844,20.0917,19.3400,16.7355,13.3094,11.3167,8.7122,8.4500	-10.453	Before
e	2011-08-18 00:00:00	2,3,4,5,5,5,5,5,5,5	26.3400,26.1894,26.1618,26.1400,26.1400,26.1400,26.1400,26.1400,26.1400,26.1400	-10.286	Before
e	2011-08-18 04:00:00	2,3,4,5,6,6	26.3600,26.2857,26.1492,26.0173,25.9413,25.9400	-10.12	Before
e	2011-08-18 08:00:00	2,3,4,5,6,7,7	26.2300,26.2288,26.2059,26.1560,26.0058,25.9400,25.9400	-9.953	Before
e	2011-08-20 08:00:00	2,4,5,5,5,5,5,5,5,5	26.3400,26.3400,26.3200,26.3200,26.3200,26.3200,26.3200,26.3200,26.3200,26.3200	-7.953	Before
e	2011-08-20 20:00:00	2,10,14,15,16,20,21,24,28,56	26.1600,24.6992,18.8384,18.4864,16.4272,14.4912,12.6960,10.9008,9.2464,8.5600	-7.453	Before
e	2011-08-22 16:00:00	2,9,12,18,23,24,25,32,39,61	25.7900,25.0244,23.1800,16.4288,13.7666,12.7400,12.6182,9.0686,8.3900,8.3900	-5.62	Before
e	2011-08-23 12:00:00	2,10,11,13,14,15,19,24,35,57	25.8600,25.5754,24.8816,22.0174,19.2955,19.2243,12.8021,10.3649,8.2657,8.0700	-4.786	Before
e	2011-08-24 00:00:00	2,12,14,16,17,18,20,21,26,51	26.0400,24.6472,23.1311,18.9175,18.4238,15.7970,14.8273,12.3415,9.4325,8.4100	-4.286	Before
e	2011-08-24 20:00:00	2,13,14,15,16,17,19,25,32,55	25.8100,23.3108,21.0404,20.8996,17.6612,16.9748,13.3844,9.7236,8.5444,8.2100	-3.453	Before
e	2011-08-25 08:00:00	2,3,5,6,7,7	25.8259,25.8300,25.8300,25.7678,25.7559,25.7500	-2.953	Before
e	2011-08-25 20:00:00	2,8,12,17,18,19,20,21,26,52	25.3300,24.9894,23.7121,15.0439,14.9076,13.3068,13.1706,11.8252,9.2196,8.3000	-2.453	Before
e	2011-08-26 04:00:00	2,3,4,5,6,7,8,8	25.7900,25.7828,25.7276,25.6958,25.6611,25.6475,25.6404,25.6400	-2.12	Before
e	2011-08-26 16:00:00	2,10,12,14,15,16,24,27,34,53	25.1600,23.7540,22.0261,17.8419,17.1813,15.7244,10.6763,9.5413,8.4063,8.2200	-1.62	Approach
e	2011-08-28 00:00:00	2,12,15,17,18,19,22,25,29,52	24.3700,24.3056,23.5494,18.9959,15.8423,14.3298,11.7393,9.8568,8.8431,8.2800	-0.286	During
e	2011-08-28 04:00:00	2,3,4,5,6,7,8,8,8,8	24.1300,24.1585,24.1585,24.1511,24.1585,24.1585,24.2000,24.2000,24.2000,24.2000	-0.12	During
e	2011-08-31 00:00:00	2,13,20,25,26,27,28,32,38,55	19.6600,18.4562,17.0411,14.9291,13.8942,13.6091,11.8667,9.4696,9.1000,9.2584	2.714	After
e	2011-08-31 04:00:00	2,6,15,17,21,25,26,28,30,52	19.6500,19.5674,18.4322,17.5860,16.9771,14.3042,12.4776,10.2175,9.4435,9.3300	2.88	After
e	2011-08-31 08:00:00	2,3,12,17,22,25,27,29,35,56	19.2200,18.6386,18.3427,17.2223,13.6602,10.6372,9.6013,9.2208,8.8085,8.6500	3.047	After
e	2011-09-01 00:00:00	2,7,17,23,25,27,28,31,40,59	19.4400,18.5519,17.8778,15.5773,12.8060,11.8430,10.9121,9.7886,8.8149,8.7400	3.714	After
e	2011-09-02 08:00:00	2,3,4,5,6,7,8,9,10,10	20.0000,19.8809,19.3914,19.1174,18.8944,18.6940,18.1762,18.1535,18.1459,18.1100	5.047	After
e	2011-09-02 16:00:00	2,6,22,23,24,27,28,29,32,59	19.8300,18.3560,15.7710,14.9460,14.9020,11.2390,10.9860,9.8640,9.2590,8.8300	5.38	After
e	2011-09-02 20:00:00	2,4,6,8,18,25,27,29,34,60	20.1700,19.7621,18.6971,18.1193,16.9183,15.4567,14.3917,11.8085,9.4971,8.8400	5.547	After
e	2011-09-03 16:00:00	2,8,9,17,24,28,29,31,36,56	19.7500,18.6551,17.9251,17.1398,15.7131,13.8440,12.1960,10.1167,8.9444,8.6900	6.38	After
e	2011-09-04 12:00:00	2,7,10,20,23,24,25,26,28,57	20.5400,19.9550,18.3722,16.3993,14.8624,12.7978,12.7519,10.5037,9.7811,9.0700	7.214	After
e	2011-09-04 16:00:00	2,9,10,20,26,28,29,31,34,59	20.3600,19.4823,18.8713,16.6048,13.1274,12.8163,11.5498,10.2499,9.6389,9.2500	7.38	After
e	2011-09-05 04:00:00	2,3,3,3,3,3,3,3,3,3	20.8900,20.8900,20.8900,20.8900,20.8900,20.8900,20.8900,20.8900,20.8900,20.8900	7.88	After
e	2011-09-06 16:00:00	2,11,15,25,28,30,31,34,39,54	20.6300,19.1898,17.7611,16.0580,14.7550,12.8233,11.3031,9.9087,9.2800,9.2000	9.38	After
e	2011-09-08 12:00:00	2,5,20,27,30,31,33,34,36,60	21.6300,21.6300,17.5567,16.3676,14.6725,12.9394,11.8009,10.5106,9.7137,8.9800	11.214	After
e	2011-09-08 16:00:00	2,12,25,27,28,29,30,31,32,58	21.5600,18.7836,16.7013,15.7674,13.5337,13.3822,11.4640,11.4135,9.9748,8.9400	11.38	After
e	2011-09-10 12:00:00	2,10,14,17,28,32,35,36,40,64	21.8400,20.7290,19.2860,19.2349,16.7703,15.0719,13.2713,11.7645,9.9639,9.0700	13.214	After
f	2011-08-14 12:00:00	2,4,12,14,16,17,19,26,31,47	26.2700,25.6245,25.4094,24.4949,20.2097,17.3947,13.6114,9.8103,8.9676,8.3400	-13.787	Before
f	2011-08-15 04:00:00	2,3,4,6,6	25.9900,25.9482,25.9400,25.9400,25.9418	-13.12	Before
f	2011-08-15 08:00:00	2,3,5,6,7,9,9,9,9,9	25.9900,25.9600,25.9600,25.9672,25.9713,25.9713,25.9713,25.9713,25.9713,25.9713	-12.954	Before
f	2011-08-16 00:00:00	2,13,17,18,19,20,21,26,29,43	25.5000,24.1280,18.5574,17.8466,14.7390,14.6067,12.5901,9.8626,8.9700,8.9700	-12.287	Before
f	2011-08-16 04:00:00	2,3,4,5,6,6	26.3400,26.3010,26.2837,26.2771,26.2700,26.2700	-12.12	Before
f	2011-08-16 12:00:00	2,12,14,15,17,20,23,27,30,45	25.9000,24.7389,22.3647,20.5970,15.9006,12.2959,10.7362,10.3203,9.1765,8.5700	-11.787	Before
f	2011-08-16 16:00:00	2,8,11,14,15,18,20,26,33,46	25.1700,24.9703,24.1217,20.9268,18.4474,13.9380,12.4404,9.9610,8.7130,8.5300	-11.62	Before
f	2011-08-17 00:00:00	2,13,15,17,18,19,22,29,30,49	25.3600,24.2853,21.7029,17.6127,16.8588,14.2764,11.7581,10.1220,9.3200,9.3200	-11.287	Before
f	2011-08-17 04:00:00	2,3,4,5,5,5,5,5,5,5	26.1500,26.0959,26.0819,26.0800,26.0800,26.0800,26.0800,26.0800,26.0800,26.0800	-11.12	Before
f	2011-08-17 20:00:00	2,14,15,16,17,20,24,26,34,52	25.8700,25.0224,22.5959,21.6984,18.2414,14.2028,12.0422,10.1475,9.3663,9.2500	-10.454	Before
f	2011-08-18 04:00:00	2,3,4,5,6,7,7,7,7,7	26.3300,26.2553,26.2002,26.1704,26.1474,26.1400,26.1400,26.1400,26.1400,26.1400	-10.12	Before
f	2011-08-18 12:00:00	2,13,15,17,18,19,21,27,35,51	26.1400,23.6653,21.9364,18.8176,18.8176,16.2920,13.5631,9.9866,9.1900,9.3086	-9.787	Before
f	2011-08-18 20:00:00	2,9,13,14,15,20,24,29,37,48	25.9700,25.4183,23.7288,21.4359,20.6256,13.0400,10.3506,9.2644,8.7300,8.7817	-9.454	Before
f	2011-08-19 00:00:00	2,10,14,15,16,18,20,26,34,41	25.6500,25.1835,23.2176,20.8686,20.2188,16.8868,14.7377,10.5560,9.1066,8.9900	-9.287	Before
f	2011-08-19 12:00:00	2,3,10,13,14,17,20,25,32,40	26.1800,25.4109,24.7292,23.7678,22.8763,18.0868,14.3111,10.4655,9.0321,8.7000	-8.787	Before
f	2011-08-20 04:00:00	2,3,5,6,7,8,10,11,12,12	26.3800,26.3200,26.3200,26.3230,26.3442,26.3536,26.3536,26.3525,26.3482,26.3482	-8.12	Before
f	2011-08-21 12:00:00	2,9,13,14,19,20,21,23,26,43	25.3000,24.7950,23.3117,21.2130,15.8320,13.9068,13.6544,11.4925,10.2617,9.5200	-6.787	Before
f	2011-08-22 04:00:00	2,3,4,5,5,5,5,5,5,5	26.4300,26.4225,26.4200,26.4200,26.4200,26.4200,26.4200,26.4200,26.4200,26.4200	-6.12	Before
f	2011-08-23 04:00:00	2,3,5,6,6,6,6,6,6,6	25.9000,25.8700,25.8700,25.8807,25.8807,25.8807,25.8807,25.8807,25.8807,25.8807	-5.12	Before
f	2011-08-26 16:00:00	2,8,11,13,16,19,25,43,50,54	22.7200,21.2742,18.3279,17.5777,14.4269,12.8174,11.1124,9.3392,9.8166,9.0800	-1.62	Approach
f	2011-08-27 16:00:00	2,9,18,22,23,24,25,35,40,43	22.4100,21.0381,14.2324,13.1698,12.0669,12.3225,11.2734,9.7401,10.1705,8.9600	-0.62	Approach
f	2011-08-27 20:00:00	2,13,14,15,16,20,21,22,35,44	23.9700,21.6279,18.7940,18.6905,17.3706,16.2966,14.1744,13.3074,11.0300,11.4829	-0.454	During
f	2011-08-29 12:00:00	2,8,10,11,17,18,19,23,36,44	19.2361,19.9400,18.3273,18.1580,18.6391,18.1224,15.7434,13.6139,11.3062,11.0300	1.213	Departure
f	2011-09-08 16:00:00	2,3,5,24,34,35,36,40,42,51	20.9200,19.7173,19.2514,16.8290,14.1101,14.7369,12.7126,12.8142,14.0424,12.4500	11.38	After
f	2011-09-09 16:00:00	2,3,4,11,15,18,33,41,43,49	21.1500,20.8095,19.6391,18.3091,16.9259,16.7663,13.6807,12.8402,11.5846,10.5100	12.38	After
f	2011-09-10 04:00:00	2,4,5,6,7,8,9,10,12,13	22.6800,22.6414,22.4889,22.2940,22.1801,21.5973,21.2943,20.7500,20.7500,20.7867	12.88	After
f	2011-09-11 00:00:00	2,6,11,15,18,20,27,29,33,45	22.3500,20.3882,19.7818,18.3312,18.2361,16.7498,14.8831,13.3968,11.9463,10.4600	13.713	After
g	2011-08-14 08:00:00	2,3,4,5,5,5,5,5,5,5	26.5200,26.4792,26.4462,26.4400,26.4400,26.4400,26.4400,26.4400,26.4400,26.4400	-13.915	Before
g	2011-08-16 04:00:00	2,3,4,4,4,4,4,4,4,4	26.0500,25.9715,25.9200,25.9200,25.9200,25.9200,25.9200,25.9200,25.9200,25.9200	-12.081	Before
g	2011-08-17 08:00:00	2,3,4,4,4,4,4,4,4,4	26.0000,25.9538,25.9200,25.9200,25.9200,25.9200,25.9200,25.9200,25.9200,25.9200	-10.915	Before
g	2011-08-17 12:00:00	2,10,12,13,14,15,17,21,34,56	25.9500,25.1919,23.9169,21.6770,21.1428,17.3522,14.5265,11.7525,8.9785,8.7200	-10.748	Before
g	2011-08-18 12:00:00	2,12,14,16,18,19,20,24,32,50	26.1200,24.6385,22.3358,18.7658,13.8571,13.3037,11.7686,9.5195,8.5378,8.2700	-9.748	Before
g	2011-08-19 00:00:00	2,10,13,14,17,18,20,24,34,45	25.9000,24.9292,22.9171,20.5697,17.9928,15.7865,14.1980,9.1325,8.2500,8.4441	-9.248	Before
g	2011-08-19 08:00:00	2,3,4,5,5,5,5,5,5,5	25.8800,25.8166,25.8100,25.8100,25.8100,25.8100,25.8100,25.8100,25.8100,25.8100	-8.915	Before
g	2011-08-19 16:00:00	2,9,12,14,15,16,18,24,30,57	25.5700,24.8119,21.5037,18.8675,16.7138,16.0935,13.1989,9.4083,8.3400,8.3917	-8.581	Before
g	2011-08-20 20:00:00	2,12,16,19,20,21,22,26,28,62	26.3500,24.5690,19.9276,14.8364,14.8364,13.0734,13.0014,9.6193,8.9896,8.3600	-7.415	Before
g	2011-08-21 16:00:00	2,11,12,13,14,15,17,24,34,50	25.8400,24.5125,22.7779,22.3000,19.9282,19.4503,15.6979,10.7065,8.3347,8.1400	-6.581	Before
g	2011-08-22 00:00:00	2,8,12,14,18,19,22,30,32,56	26.2600,25.6840,23.8480,21.8680,20.4640,16.9360,14.4700,11.2840,9.3760,8.2600	-6.248	Before
g	2011-08-23 20:00:00	2,10,12,15,16,19,20,24,32,52	25.9500,25.0985,23.1648,18.3573,17.6654,12.6450,12.5918,9.8066,8.4761,8.2100	-4.415	Before
g	2011-08-24 00:00:00	2,12,13,14,16,18,19,20,22,51	25.4300,23.5888,21.7476,21.4696,17.0403,13.8442,13.8442,11.0476,9.5538,8.0600	-4.248	Before
g	2011-08-24 08:00:00	2,3,4,5,7,7	24.7600,24.7600,24.7114,24.6900,24.6900,24.6930	-3.915	Before
g	2011-08-24 16:00:00	2,11,13,17,18,19,20,21,24,53	24.8300,24.4960,23.7111,18.2669,15.8454,15.5281,12.2549,12.1881,9.4994,8.1300	-3.581	Before
g	2011-08-24 20:00:00	2,6,9,12,13,14,16,17,22,51	24.2500,23.9940,22.8580,20.1700,18.2180,17.4660,14.3940,11.7540,9.1780,8.2500	-3.415	Before
g	2011-08-25 16:00:00	2,8,10,12,13,15,18,21,35,51	23.6000,23.4135,22.6210,19.0157,17.6171,15.9699,11.5254,9.4586,8.2309,8.0600	-2.581	Before
g	2011-08-25 20:00:00	2,7,9,12,15,16,19,20,33,51	24.0000,23.6177,22.6141,17.3731,14.1871,13.8685,9.8701,9.4400,8.1815,8.0700	-2.415	Before
g	2011-08-26 04:00:00	2,3,5,6,7,7	23.9700,23.9500,23.9500,23.9586,23.9630,23.9656	-2.081	Before
g	2011-08-27 20:00:00	2,11,13,15,16,19,20,21,29,54	25.2000,24.9977,24.3401,21.2885,18.0514,12.8922,12.6899,10.6498,8.9975,8.3400	-0.415	During
g	2011-08-28 12:00:00	2,3,4,5,6,8,8	19.7700,19.9430,20.0998,20.1955,20.2300,20.2300,20.1610	0.252	During
g	2011-08-29 12:00:00	2,12,17,21,26,27,28,30,31,55	18.4400,18.1251,17.4363,15.9702,11.5618,11.3355,9.9087,9.5250,8.8657,8.6000	1.252	Departure
g	2011-08-29 16:00:00	2,13,22,23,25,28,30,31,39,56	17.9500,17.7993,16.3957,15.9906,14.4363,10.3010,9.0387,8.8220,8.5300,8.5300	1.419	Departure
g	2011-08-30 04:00:00	2,15,19,22,24,25,28,29,32,45	18.4200,17.9611,17.3684,16.5367,15.2270,15.1505,12.2634,10.6190,9.3762,8.8600	1.919	Departure
g	2011-08-30 08:00:00	2,4,5,6,6,6,6,6,6,6	18.3900,18.3900,18.3922,18.4000,18.4000,18.4000,18.4000,18.4000,18.4000,18.4000	2.085	After
g	2011-08-31 16:00:00	2,18,21,22,25,26,28,35,42,46	18.9400,17.0046,15.7656,14.3934,11.8232,10.3794,9.5397,9.0174,9.2530,8.7000	3.419	After
g	2011-09-01 04:00:00	2,16,18,20,21,22,23,25,32,41	19.2200,16.7949,16.1958,14.9976,13.3238,12.9529,10.7466,10.0429,9.7100,9.8907	3.919	After
g	2011-09-01 08:00:00	2,3,4,4	19.6200,18.5322,18.4947,18.4100	4.085	After
g	2011-09-01 20:00:00	2,4,13,16,19,21,25,26,31,49	19.6200,18.9995,18.4183,17.7978,15.0201,13.8184,13.1683,12.0454,10.1148,9.7700	4.585	After
g	2011-09-02 00:00:00	2,19,20,21,22,25,26,28,33,44	20.0000,17.3312,16.1080,16.0302,14.4511,12.2716,10.9261,9.7918,8.9578,8.8800	4.752	After
g	2011-09-02 16:00:00	2,5,15,20,24,25,26,27,30,44	19.2700,18.3609,17.4219,15.4638,13.2360,12.0173,11.8974,10.7685,9.6296,9.2800	5.419	After
g	2011-09-02 20:00:00	2,7,14,25,28,32,40,43,44,48	19.6800,17.5563,16.2290,12.7883,11.3486,10.4297,9.4700,9.4700,10.2664,10.1439	5.585	After
g	2011-09-04 16:00:00	2,11,16,18,19,26,28,29,35,61	20.2100,19.6380,17.7556,16.3724,16.3308,13.2732,12.9092,12.1292,10.6212,9.8100	7.419	After
g	2011-09-05 00:00:00	2,13,18,23,25,26,28,33,38,67	20.8600,19.9130,17.2316,15.7141,14.5845,13.1126,11.5951,9.7581,9.4500,9.6668	7.752	After
g	2011-09-05 20:00:00	2,8,21,28,36,40,45,51,57,67	21.4300,19.3397,17.6475,14.5728,14.3516,12.0179,10.3700,10.3700,11.7083,12.4050	8.585	After
g	2011-09-06 08:00:00	2,3,5,6,7,8,9,10,11,12	21.2000,21.2000,21.1515,21.1758,21.1758,21.0889,21.0647,20.8909,20.5425,20.1900	9.085	After
g	2011-09-06 16:00:00	2,12,25,29,32,36,42,44,53,60	21.1000,19.3787,18.6369,17.9617,16.5447,15.5367,12.5505,12.0370,11.5900,11.8087	9.419	After
g	2011-09-07 20:00:00	2,7,14,20,25,29,32,33,36,47	22.5300,21.7901,19.7712,16.9121,15.4449,13.1752,12.4980,11.7581,10.5292,9.9900	10.585	After
g	2011-09-09 20:00:00	2,9,12,14,19,20,21,25,28,40	23.0900,21.0536,21.1500,21.8971,21.3789,20.9090,19.0171,13.7754,11.3171,11.0400	12.585	After
g	2011-09-10 08:00:00	2,3,4,5,5	22.6600,22.6629,22.6849,22.6988,22.7100	13.085	After
g	2011-09-10 12:00:00	2,6,12,22,24,25,26,27,29,46	22.5600,22.1789,19.6540,16.8075,15.2234,13.7704,12.9367,11.5313,10.8763,10.6500	13.252	After
h	2011-08-15 16:00:00	2,7,17,20,21,22,23,27,34,49	23.5800,22.5633,16.2768,16.7207,13.6849,14.7589,12.6825,10.7063,11.7230,9.2600	-12.634	Before
h	2011-08-15 20:00:00	2,5,10,11,13,16,21,24,27,48	26.1900,26.0510,23.3918,22.0188,21.6191,16.3008,13.9892,13.3636,11.0520,8.8100	-12.468	Before
h	2011-08-17 08:00:00	2,3,6,7,9,10,11,12,13,14	25.8604,25.8784,25.8807,25.8900,25.8900,25.8375,25.7238,25.6499,25.6000,25.6000	-10.968	Before
h	2011-08-19 04:00:00	2,3,3,3,3,3,3,3,3,3	26.3000,26.3100,26.3100,26.3100,26.3100,26.3100,26.3100,26.3100,26.3100,26.3100	-9.134	Before
h	2011-08-20 20:00:00	2,4,9,10,16,17,20,25,26,36	24.8000,23.1909,23.5401,21.3997,19.6692,17.3466,15.0241,14.6142,12.1095,9.6200	-7.468	Before
h	2011-08-21 16:00:00	2,5,10,14,18,19,20,22,29,43	24.3000,23.9998,21.7033,17.0502,15.8794,13.9881,14.1682,12.4571,10.7610,9.2900	-6.634	Before
h	2011-08-23 04:00:00	2,3,4,4,4,4,4,4,4,4	25.7700,25.7483,25.7400,25.7400,25.7400,25.7400,25.7400,25.7400,25.7400,25.7400	-5.134	Before
h	2011-08-23 12:00:00	2,8,16,18,19,20,22,39,42,46	25.4600,24.1029,14.8652,14.6853,14.0967,12.5598,11.7260,9.1100,9.1100,10.3199	-4.801	Before
h	2011-08-24 00:00:00	2,3,4,5,7,8,8,8,8,8	25.9200,25.9200,25.8869,25.8800,25.8800,25.8941,25.8941,25.8941,25.8941,25.8941	-4.301	Before
h	2011-08-25 20:00:00	2,9,14,19,22,23,29,30,33,54	23.4200,21.6486,18.8026,14.3595,13.7352,11.5136,10.8312,9.9164,9.3501,8.9000	-2.468	Before
h	2011-08-26 04:00:00	2,4,4,4,4,4,4,4,4,4	24.1300,24.1300,24.1300,24.1300,24.1300,24.1300,24.1300,24.1300,24.1300,24.1300	-2.134	Before
h	2011-08-26 16:00:00	2,8,14,16,17,22,23,30,31,47	22.5100,20.8674,15.9537,15.6753,13.9910,12.0700,10.5527,9.8428,8.7431,8.5900	-1.634	Approach
h	2011-08-27 04:00:00	2,3,4	24.7600,24.8800,24.8800	-1.134	Approach
h	2011-08-27 16:00:00	2,10,12,15,20,21,23,24,32,42	23.5000,22.2683,20.9327,17.2672,13.9430,11.9100,11.7319,10.7524,9.0607,8.6600	-0.634	Approach
h	2011-08-27 20:00:00	2,10,13,14,15,16,19,23,32,42	24.1106,24.1700,23.2939,19.2695,18.3933,16.1213,14.5472,11.0574,9.3200,9.7209	-0.468	During
h	2011-08-28 00:00:00	2,3,4,5,6,7,8,9,10,10	24.0000,24.0000,24.0284,24.0427,24.0910,24.1240,24.1284,24.1301,24.1366,24.1400	-0.301	During
h	2011-08-28 12:00:00	2,13,15,17,19,21,24,25,27,36	21.8500,21.3808,20.8748,19.8628,16.4680,14.9868,15.3180,14.9868,13.3308,12.6500	0.199	During
h	2011-08-29 00:00:00	2,13,17,21,22,23,25,29,39,49	19.2900,18.9601,17.7847,15.3207,13.5886,13.5473,10.6296,10.6296,8.9800,8.9800	0.699	Departure
h	2011-08-30 12:00:00	2,14,19,20,21,24,26,29,35,45	20.0900,19.1748,16.7026,15.0509,14.1883,13.7780,11.5478,10.2222,9.5700,9.5700	2.199	After
h	2011-08-31 00:00:00	2,12,16,20,21,23,24,26,29,39	20.3000,19.8032,18.7889,14.6903,14.4108,12.2166,12.1752,11.0367,10.5089,9.9500	2.699	After
h	2011-08-31 16:00:00	2,4,10,14,19,21,24,25,27,40	19.5700,19.0392,18.8076,18.0935,15.4784,13.6642,11.8789,11.8500,10.7113,9.9200	3.366	After
h	2011-09-01 00:00:00	2,9,12,14,16,17,18,26,34,43	19.1600,18.6284,17.7454,16.9976,15.4839,15.4118,14.3126,10.8888,10.1500,10.3572	3.699	After
h	2011-09-01 20:00:00	2,4,6,16,22,23,25,26,29,42	19.2300,19.2300,18.4827,17.0731,13.9986,12.9202,12.3620,11.2458,10.3565,9.7700	4.532	After
h	2011-09-02 16:00:00	2,6,15,16,17,20,21,27,34,40	19.5300,19.3382,17.6120,16.7010,16.7010,13.2485,12.6060,10.6113,9.9400,10.1606	5.366	After
h	2011-09-03 00:00:00	2,6,8,13,17,21,23,26,31,40	20.4400,20.1940,18.7488,17.6213,15.1715,11.6762,10.9895,10.4257,10.1900,10.1900	5.699	After
h	2011-09-03 12:00:00	2,6,12,15,19,20,22,26,27,39	20.0200,19.7682,18.2472,16.1912,14.2190,14.1351,12.2364,11.2923,10.3063,9.5300	6.199	After
h	2011-09-03 20:00:00	2,15,17,18,22,23,26,29,36,42	19.9000,17.8775,17.0475,15.7024,14.2046,12.9358,12.6782,11.1804,10.3600,10.4649	6.532	After
h	2011-09-05 08:00:00	2,3,4	20.5300,20.5400,20.5400	8.032	After
h	2011-09-05 16:00:00	2,12,23,24,26,28,32,33,34,43	19.8900,17.3218,14.8531,14.2000,13.5469,11.2443,10.3366,10.7240,8.8200,8.8975	8.366	After
h	2011-09-06 00:00:00	2,3,4,4,4,4,4,4,4,4	21.0900,21.1062,21.1100,21.1100,21.1100,21.1100,21.1100,21.1100,21.1100,21.1100	8.699	After
h	2011-09-06 08:00:00	2,3,5,6,6	20.7500,20.7500,20.7500,20.7500,20.7500	9.032	After
h	2011-09-07 16:00:00	2,12,16,18,19,20,28,34,44,46	20.7400,18.7045,17.2290,15.2473,15.0319,13.6426,11.0578,10.0885,9.9700,10.5085	10.366	After
h	2011-09-09 20:00:00	2,7,12,13,18,20,21,23,31,38	22.4200,21.8585,19.8216,19.0509,17.4545,15.8140,15.5498,12.2688,11.4100,11.6192	12.532	After
h	2011-09-10 12:00:00	2,7,11,17,22,23,24,28,34,43	22.5800,21.5838,19.6602,17.7252,14.2673,14.2215,13.2826,11.7941,11.1300,11.2102	13.199	After
h	2011-09-10 16:00:00	2,7,8,13,14,21,25,30,34,43	22.2400,21.4157,20.6378,19.5000,18.8150,17.0039,13.4977,11.4891,10.6300,10.6300	13.366	After
i	2011-08-14 08:00:00	2,3,5,7,9,10,11,12,13,14	26.2800,26.2487,26.2487,26.2696,26.2696,26.1652,25.8494,25.1107,23.9649,23.6700	-13.891	Before
i	2011-08-15 08:00:00	2,3,4,6,7,8,9,10,11,11	25.6400,25.6400,25.6264,25.6264,25.4958,25.3034,25.0559,24.9600,24.9600,24.9600	-12.891	Before
i	2011-08-15 16:00:00	2,8,11,15,18,20,22,23,26,31	25.2200,24.4032,22.3539,16.4733,12.9242,11.9886,11.8698,11.1125,10.5333,10.3700	-12.557	Before
i	2011-08-17 12:00:00	2,7,8,9,10,11,14,15,21,34	25.5187,25.7100,24.8971,23.8928,21.1990,20.9439,16.6401,14.5201,10.5670,9.7700	-10.724	Before
i	2011-08-17 20:00:00	2,5,10,11,12,13,16,17,21,34	26.4200,26.0434,23.6429,21.9170,21.5561,19.0300,16.8177,14.2916,10.7300,10.7300	-10.391	Before
i	2011-08-18 04:00:00	2,8,10,11,12,13,15,21,23,25	26.2200,25.7986,24.7902,22.8488,19.3722,18.7100,15.4743,11.3958,11.1700,12.2837	-10.057	Before
i	2011-08-20 00:00:00	2,7,9,11,13,15,17,19,21,28	25.9100,25.6602,23.3343,22.1012,19.6660,16.3567,15.4981,12.5635,10.9712,10.3000	-8.224	Before
i	2011-08-21 20:00:00	2,7,10,11,14,15,17,26,32,35	25.8800,25.2002,20.7815,20.4725,17.5061,15.1422,14.1226,10.9090,10.4300,11.2025	-6.391	Before
i	2011-08-22 04:00:00	2,3,4,5,6,7,8,9,11,11	25.9700,25.9582,25.9469,25.8579,25.8415,25.7739,25.5563,25.5500,25.5500,25.5500	-6.057	Before
i	2011-08-24 12:00:00	2,7,8,9,13,14,17,20,28,39	25.1700,24.6990,23.7127,21.6372,17.2506,15.2929,14.1889,11.8926,10.4500,10.4500	-3.724	Before
i	2011-08-25 00:00:00	2,7,8,9,10,11,14,16,23,33	25.2300,24.8738,23.5382,20.3328,19.1753,16.6673,14.9162,12.8238,10.6720,10.3900	-3.224	Before
i	2011-08-25 04:00:00	2,3,4,5,6,7,8,9,10,10	25.1000,25.1000,25.0953,25.0953,25.0953,25.0304,24.9655,24.8959,24.6787,23.9200	-3.057	Before
i	2011-08-26 08:00:00	2,3,4,5,6,7,8,8	24.2400,24.2519,24.2547,24.2610,24.2638,24.2720,24.2880,24.3200	-1.891	Approach
i	2011-08-29 12:00:00	2,8,10,14,15,18,19,23,27,38	19.9000,19.7804,18.7634,18.2549,17.6667,13.5990,12.7415,10.5880,9.9300,10.0397	1.276	Departure
i	2011-08-29 16:00:00	2,5,13,14,16,19,21,31,37,39	19.7900,19.4751,17.6646,17.1234,13.2267,10.9143,10.4125,9.9500,9.9500,10.3338	1.443	Departure
i	2011-08-29 20:00:00	2,6,9,10,13,15,16,18,24,29	20.5400,20.3434,19.7634,19.2228,16.7161,15.8708,14.2488,11.9781,10.7788,10.7100	1.609	Departure
i	2011-08-30 12:00:00	2,8,12,15,16,17,20,26,32,38	20.5306,20.7500,19.5872,17.0421,15.6270,13.3452,11.2390,9.9445,9.7800,10.2517	2.276	After
i	2011-09-01 04:00:00	2,3,4,6,7,8,9,9	20.9756,20.9843,20.9900,20.9900,20.9880,20.9756,20.9700,20.9700	3.943	After
i	2011-09-02 12:00:00	2,16,18,19,20,21,22,25,32,40	20.6100,18.5695,17.2157,15.3715,15.2930,13.3702,12.3304,11.4475,10.8000,10.8687	5.276	After
i	2011-09-03 00:00:00	2,10,14,16,18,19,20,23,29,34	20.6600,19.6351,16.2459,14.7715,13.8905,13.7827,13.0365,12.5151,12.4072,11.6700	5.776	After
i	2011-09-03 08:00:00	2,3,5,6,7,8,9,10,10,10	20.7370,20.7500,20.7500,20.7297,20.6949,20.5953,20.4800,20.4800,20.4800,20.4800	6.109	After
i	2011-09-05 12:00:00	2,9,15,20,23,26,27,31,32,33	21.3100,18.9343,17.8079,15.4834,13.4354,12.8313,11.5103,11.0700,11.3465,12.3500	8.276	After
i	2011-09-06 08:00:00	2,3,4,5,6,7,8,9,10,10	21.2200,21.2200,21.2114,21.1768,21.1133,21.1055,21.0985,21.0893,21.0400,21.0400	9.109	After
i	2011-09-06 16:00:00	2,11,12,15,19,21,22,27,32,43	20.7200,19.8455,19.0575,18.1541,16.1552,15.0981,13.9738,11.8211,11.2541,11.1100	9.443	After
i	2011-09-07 08:00:00	2,3,4,5,6,7,8,9,9,9	22.2300,22.2236,22.2194,22.2030,22.0572,21.7641,21.7000,21.7000,21.7000,21.7000	10.109	After
i	2011-09-07 12:00:00	2,6,7,11,12,13,19,22,25,28	22.1800,21.7380,20.4894,19.3181,18.1468,18.1026,14.6771,14.0251,11.7709,11.1300	10.276	After
i	2011-09-08 08:00:00	2,4,4,4,4,4,4,4,4,4	22.8800,22.8800,22.8800,22.8800,22.8800,22.8800,22.8800,22.8800,22.8800,22.8800	11.109	After
i	2011-09-09 00:00:00	2,12,14,17,18,19,20,27,31,36	23.2800,21.3018,19.8565,18.5343,18.5343,17.1300,17.0480,13.5117,13.0300,13.1017	11.776	After
i	2011-09-10 20:00:00	2,9,12,13,14,21,29,33,40,43	22.8400,20.8217,18.7706,18.7269,18.0396,16.5449,13.1192,12.3991,12.4755,11.9300	13.609	After
